# Supplementary material for: Stereoselective synthesis of α-(dichloromethyl)-amines, α-(chloromethyl)amines, and α-chloro-aziridines
Source: Royal Society of Chemistry journal article supplement (doi:10.1039/c4ra00471j), 2014-01-01

# Stereoselective Synthesis of $\alpha$ -(Dichloromethyl)amines, $\alpha$ -(Chloromethyl)amines, and $\alpha$ -Chloroaziridines

Desheng Li, Ya Li\*, Zhiqiu Chen, Huaqi Shang, Hongsen Li, Xinfeng Ren

Department of Chemistry and Chemical Engineering, Shanghai University of Engineering Science,  
333 Longteng Road, Shanghai 201620, China

E-mail: [ya.li@sues.edu.cn](mailto:ya.li@sues.edu.cn)

## Contents

|                                                                                        |     |
|----------------------------------------------------------------------------------------|-----|
| General procedures.....                                                                | S2  |
| Determination of the configuration of compound <b>5c</b> .....                         | S3  |
| <sup>1</sup> H NMR Spectra of the crude products <b>3</b> .....                        | S5  |
| <sup>1</sup> H NMR Spectra of the crude products <b>5</b> .....                        | S11 |
| <sup>1</sup> H NMR of the crude product <b>3a</b> via radical mono-dechlorination..... | S14 |
| LC-MS spectra of the crude products <b>3</b> .....                                     | S15 |
| NMR Spectra for all new products.....                                                  | S23 |

## General Procedures.

All commercial reagents and solvents were used directly as purchased without further purification. THF was distilled from sodium/benzophenone. N,N-Dimethylformamide was distilled from CaH<sub>2</sub>. Flash chromatography was performed on silica gel with petroleum ether (PE)/EtOAc as the eluent. Melting points were uncorrected. Optical rotations were measured with a sodium lamp. <sup>1</sup>H NMR spectra were recorded at 400 MHz. Decoupled <sup>13</sup>C NMR spectra were recorded at 100 MHz at the given temperatures. Chemical shifts ( $\delta$ ) are reported in parts per million and referenced to the residual solvent peak, and *J* values are given in hertz (Hz).

## Determination of the configuration of compound 5c

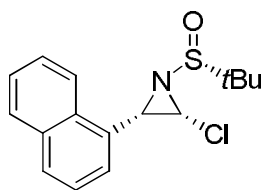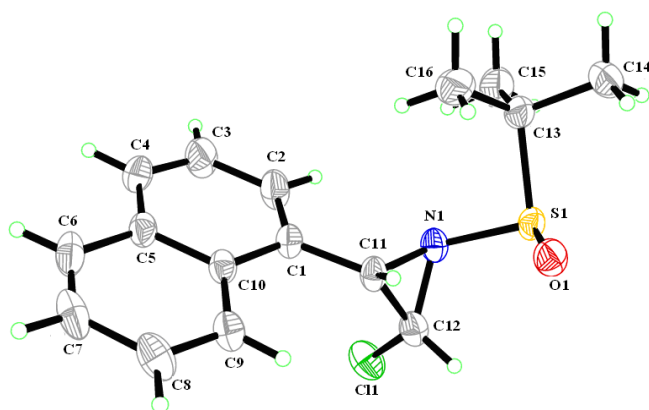

## Packing view of compound 5c

The Cl $\cdots$ O distance is 3.183Å

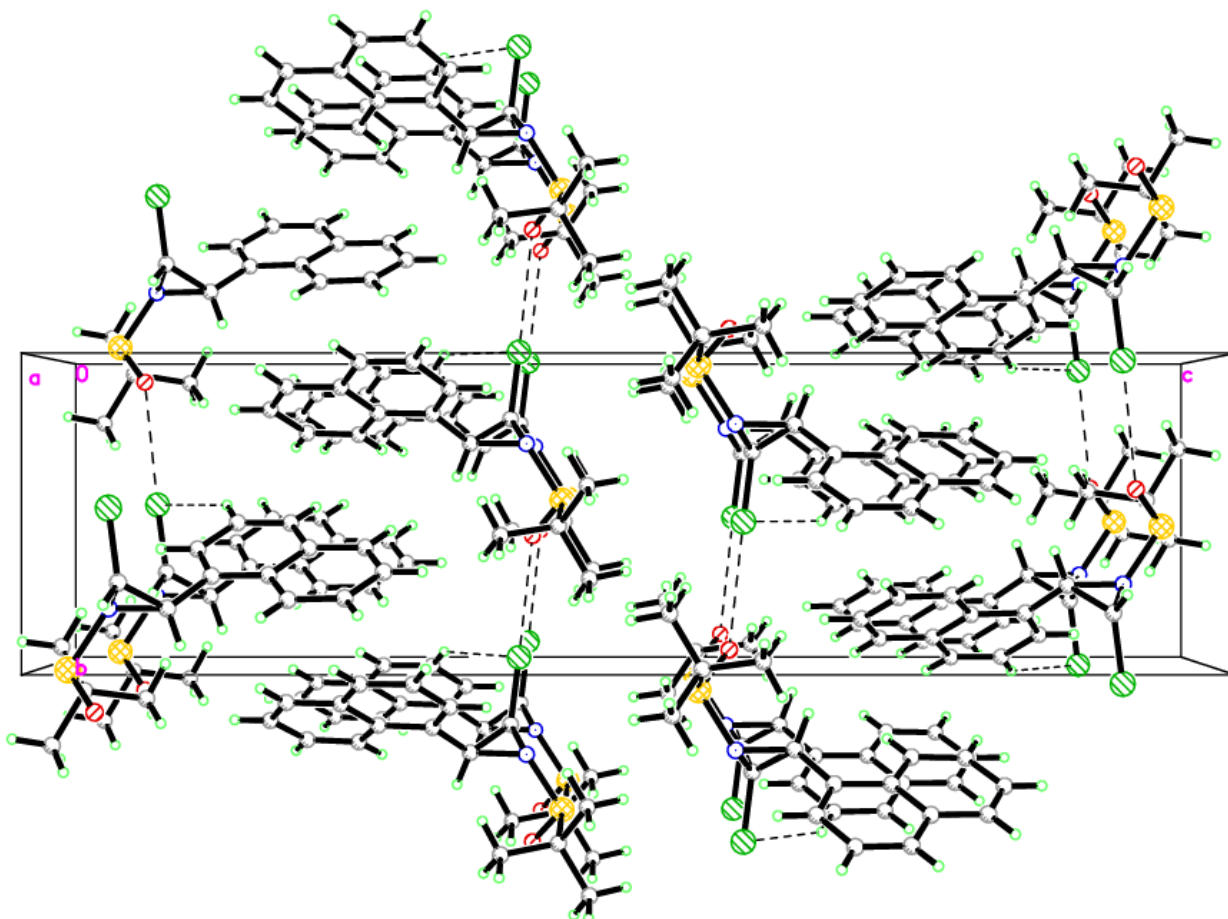

# <sup>1</sup>H NMR Spectra of the crude products 3

## <sup>1</sup>H NMR of crude product 3a

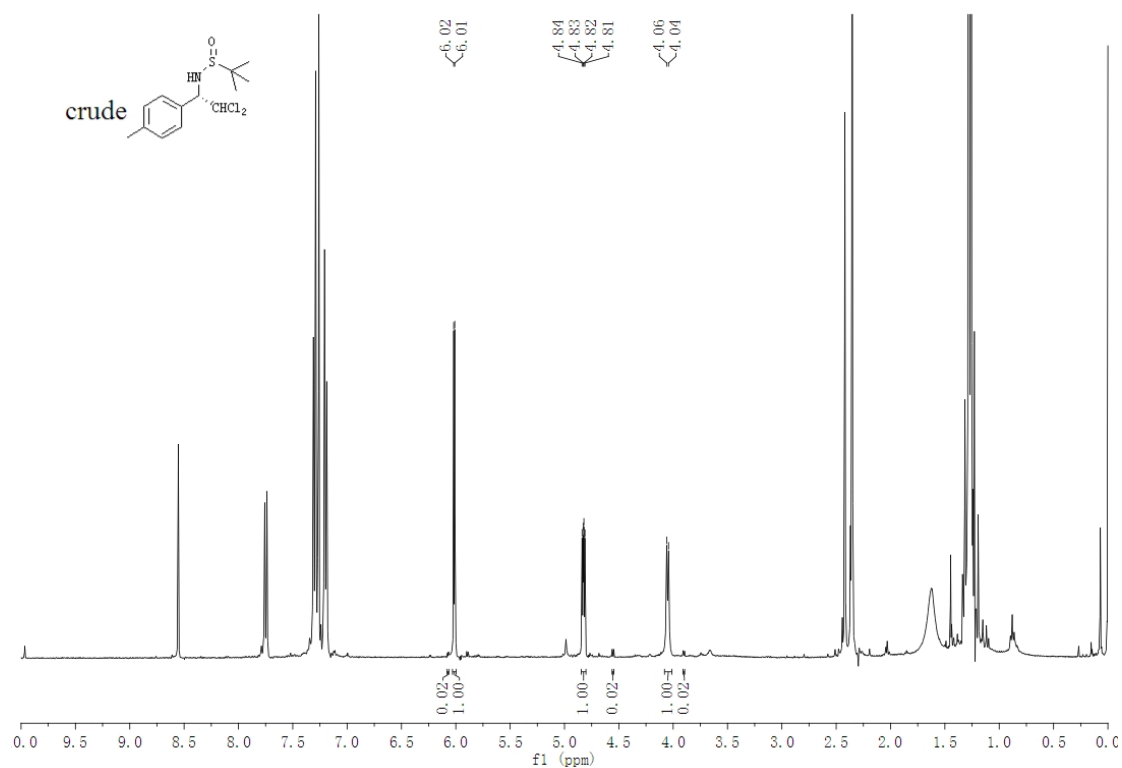

## <sup>1</sup>H NMR of crude product 3b

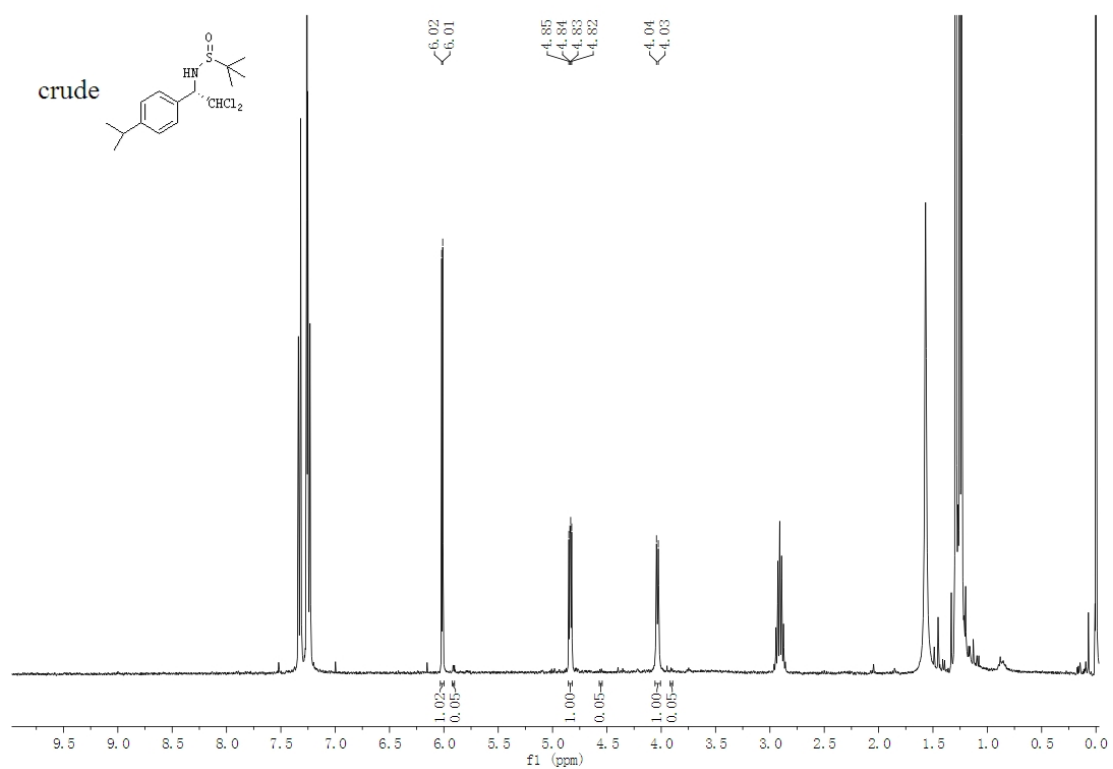

### <sup>1</sup>H NMR of crude product **3c**

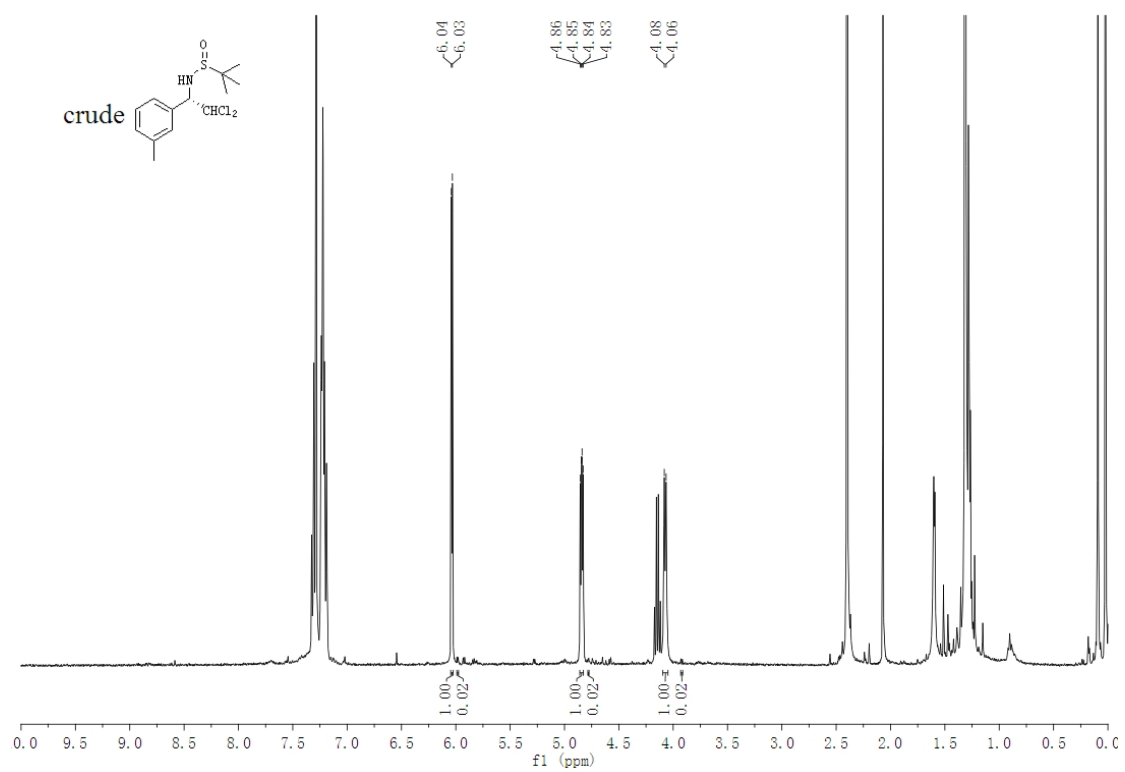

### <sup>1</sup>H NMR of crude product **3d**

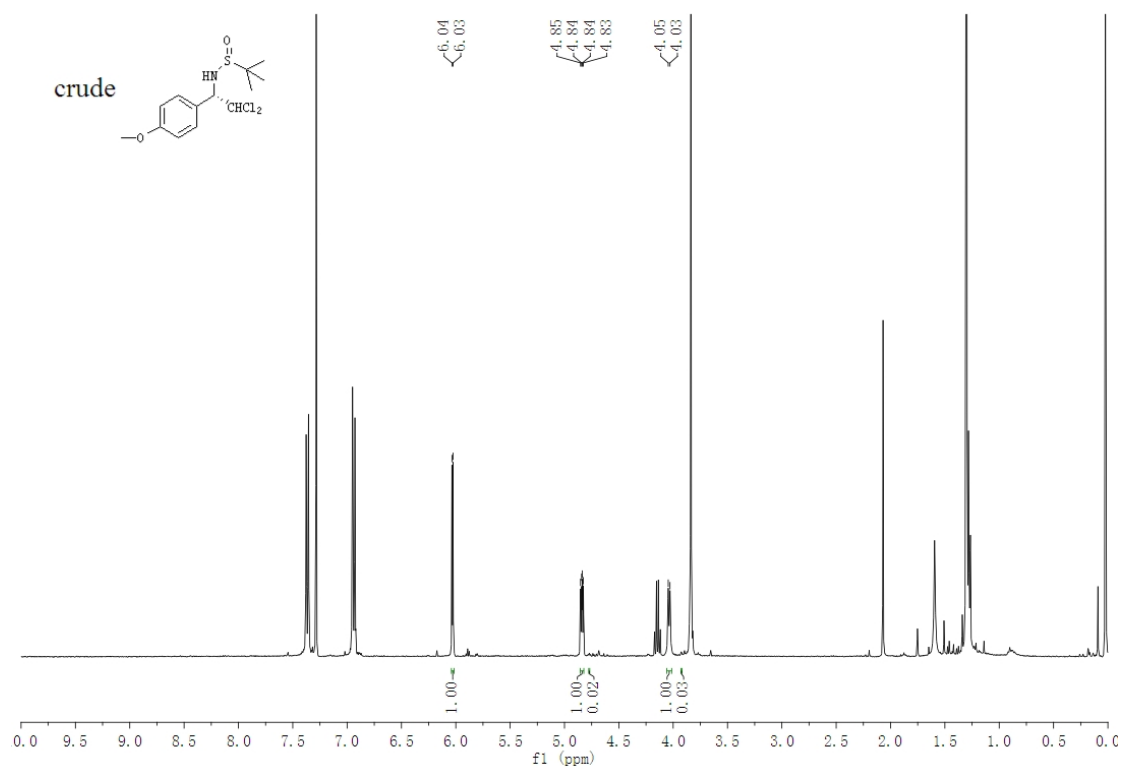

### <sup>1</sup>H NMR of crude product 3e

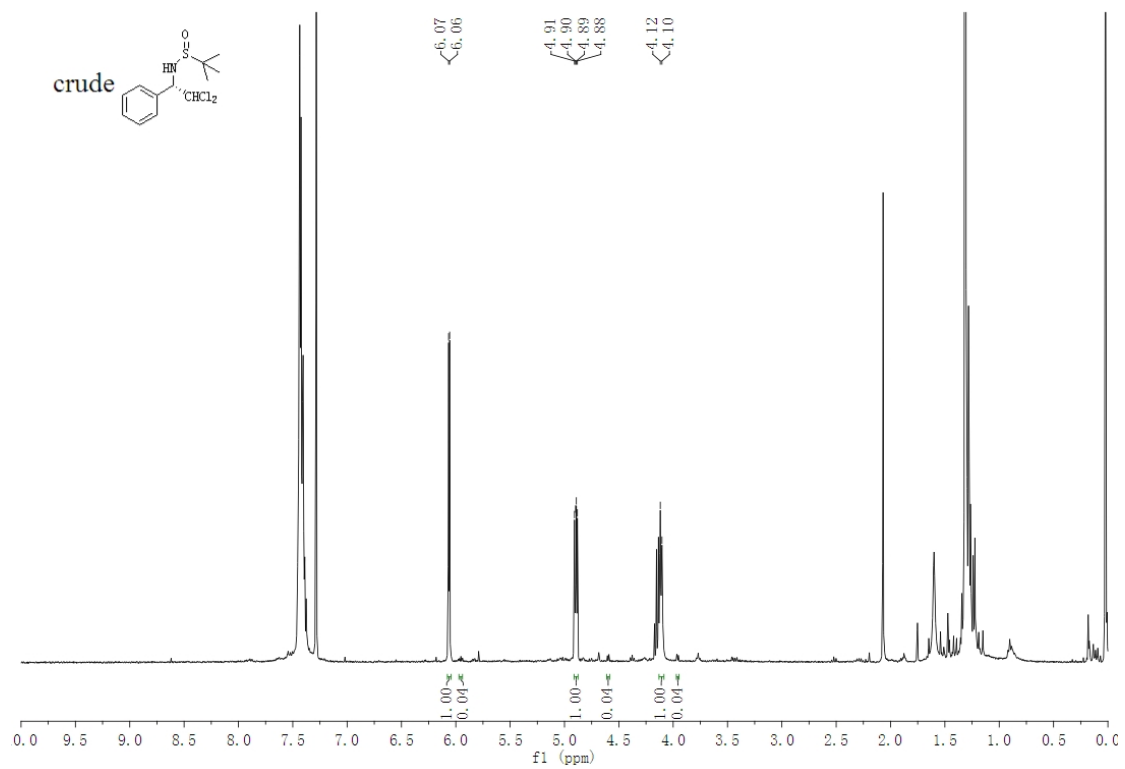

### <sup>1</sup>H NMR of crude product 3f

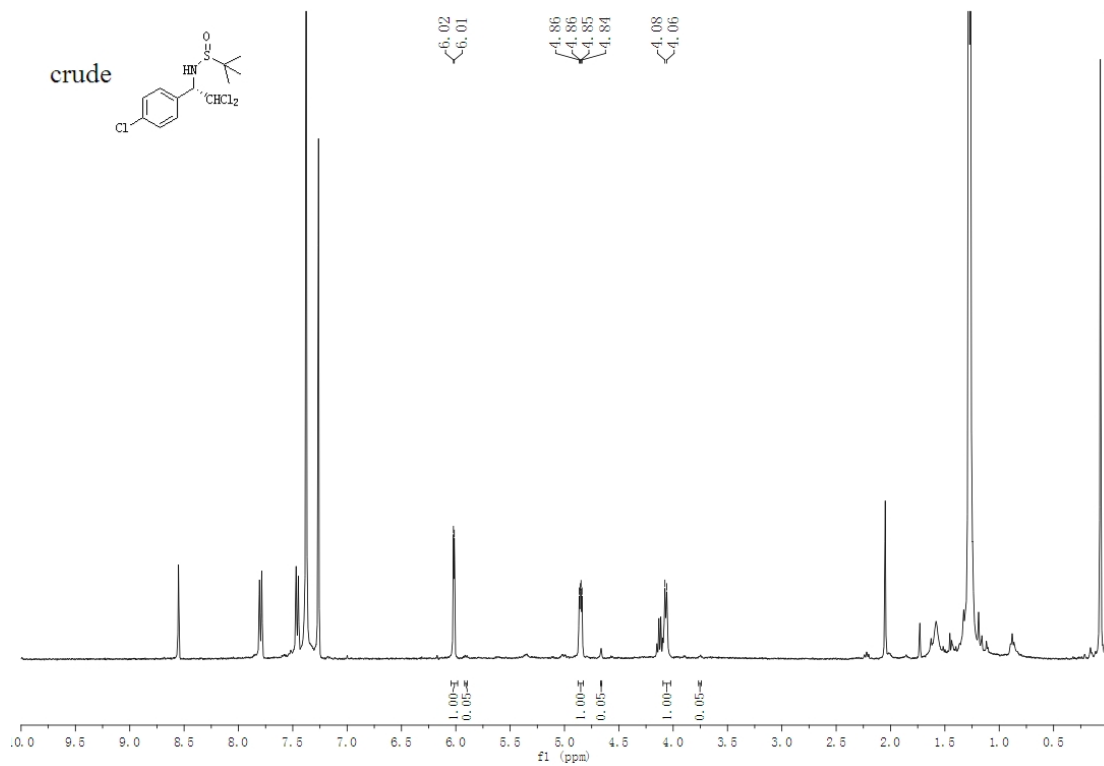

### <sup>1</sup>H NMR of crude product **3g**

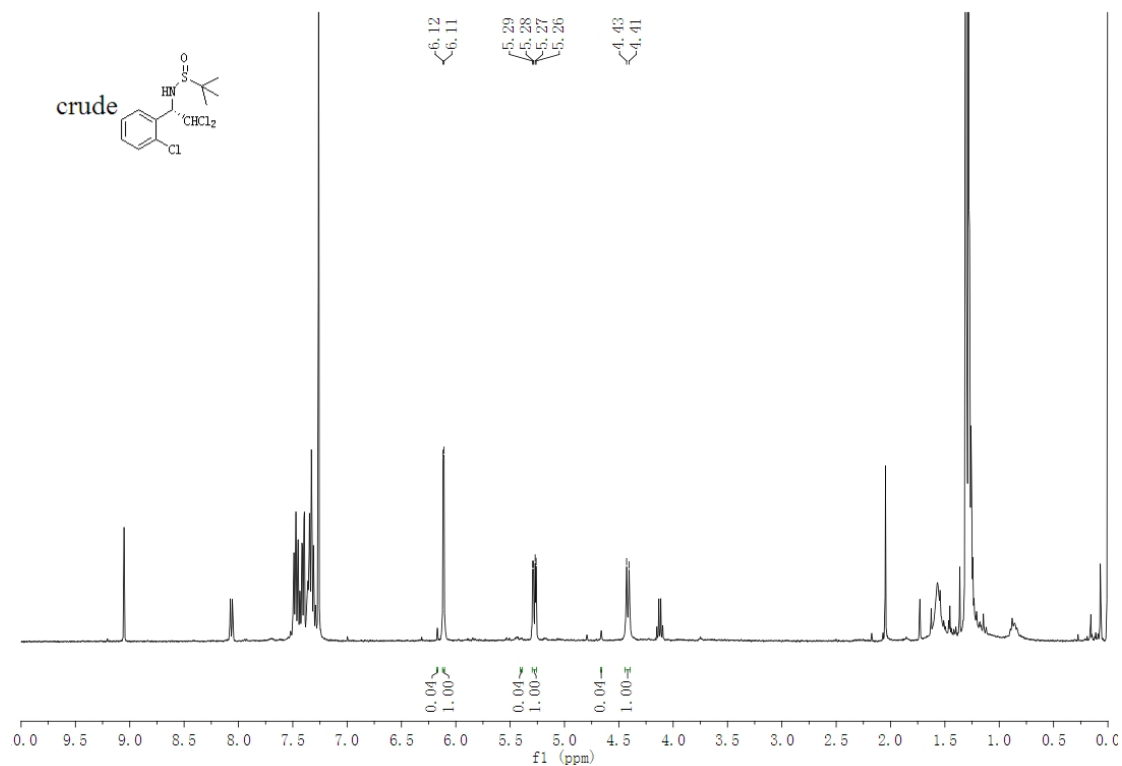

### <sup>1</sup>H NMR of crude product **3h**

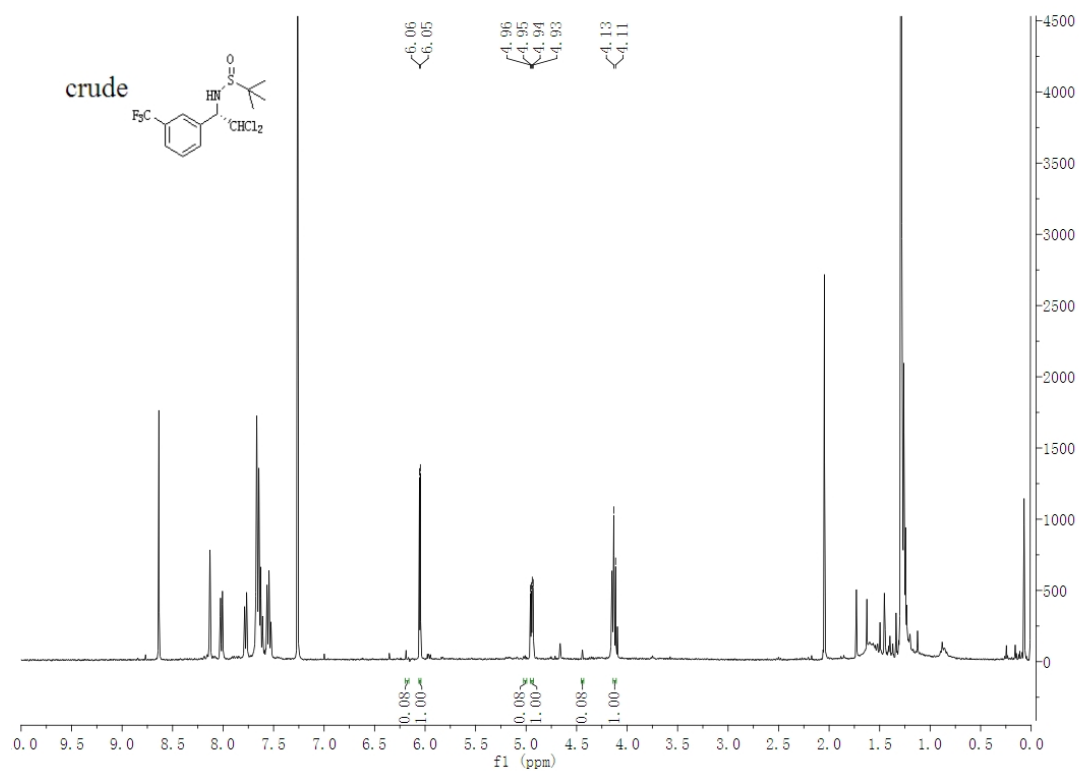



### <sup>1</sup>H NMR of crude product 3i

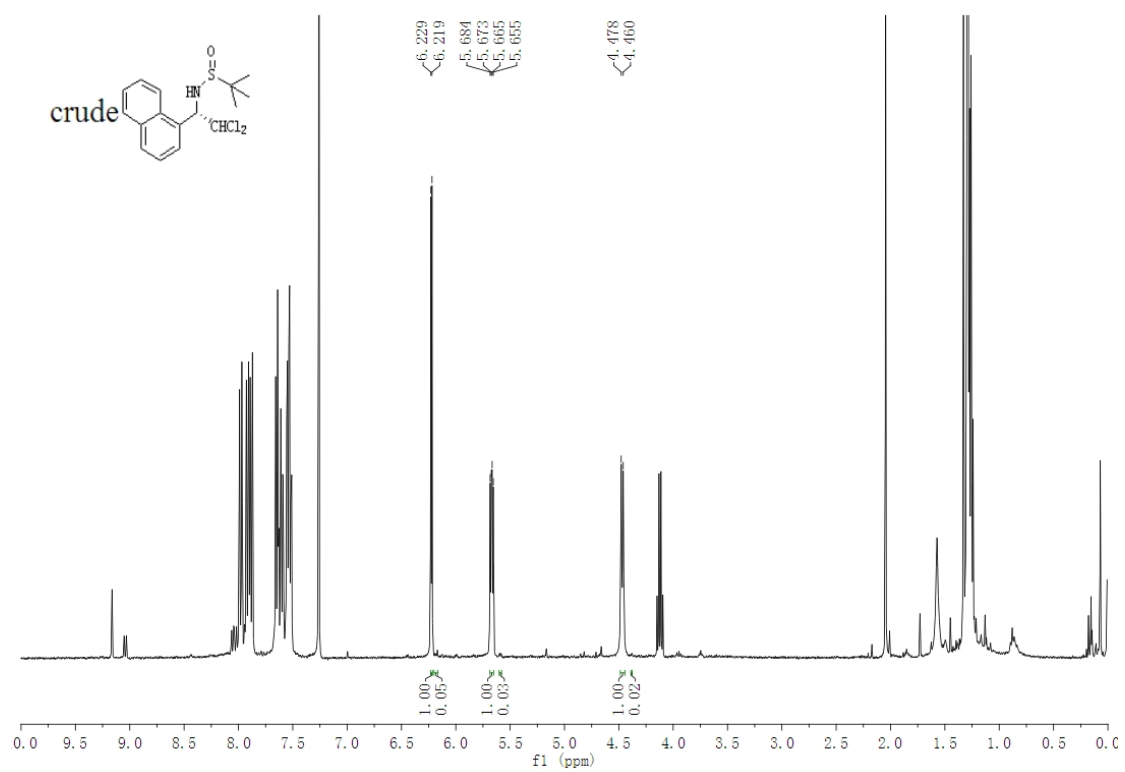

### <sup>1</sup>H NMR of crude product 3j

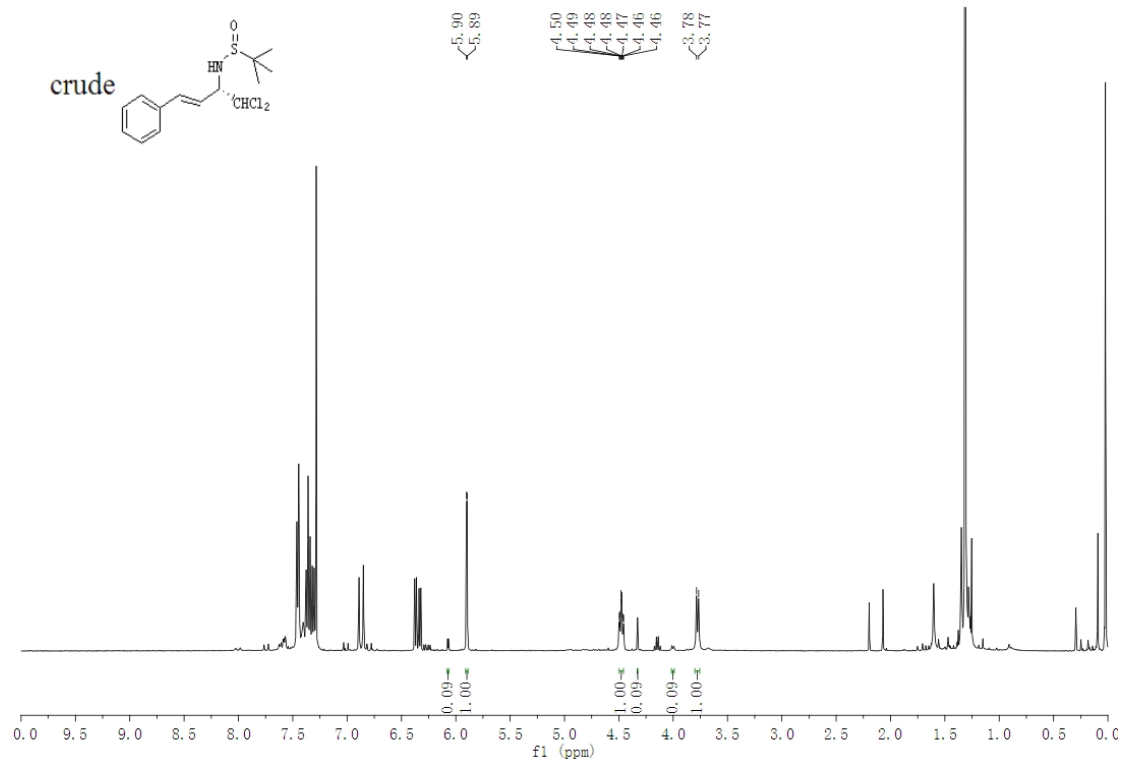

<sup>1</sup>H NMR of crude product **3k**

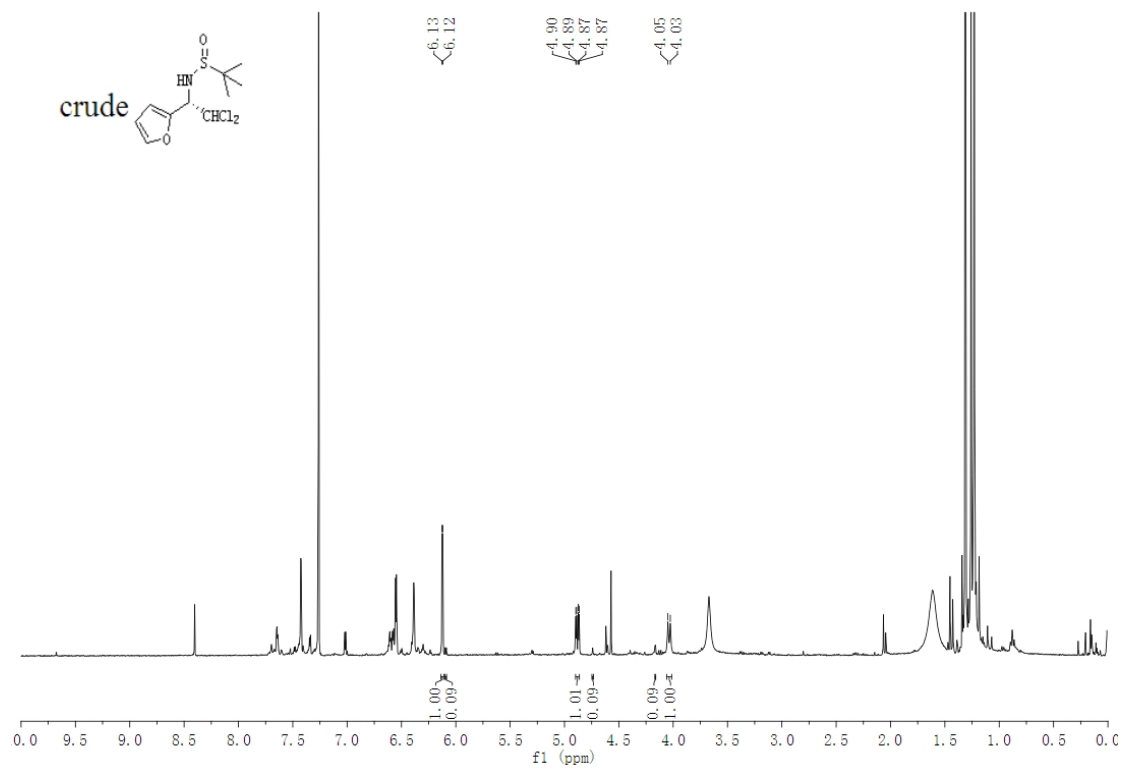

# <sup>1</sup>H NMR Spectra of the crude products **5**

## <sup>1</sup>H NMR of crude product **5a**

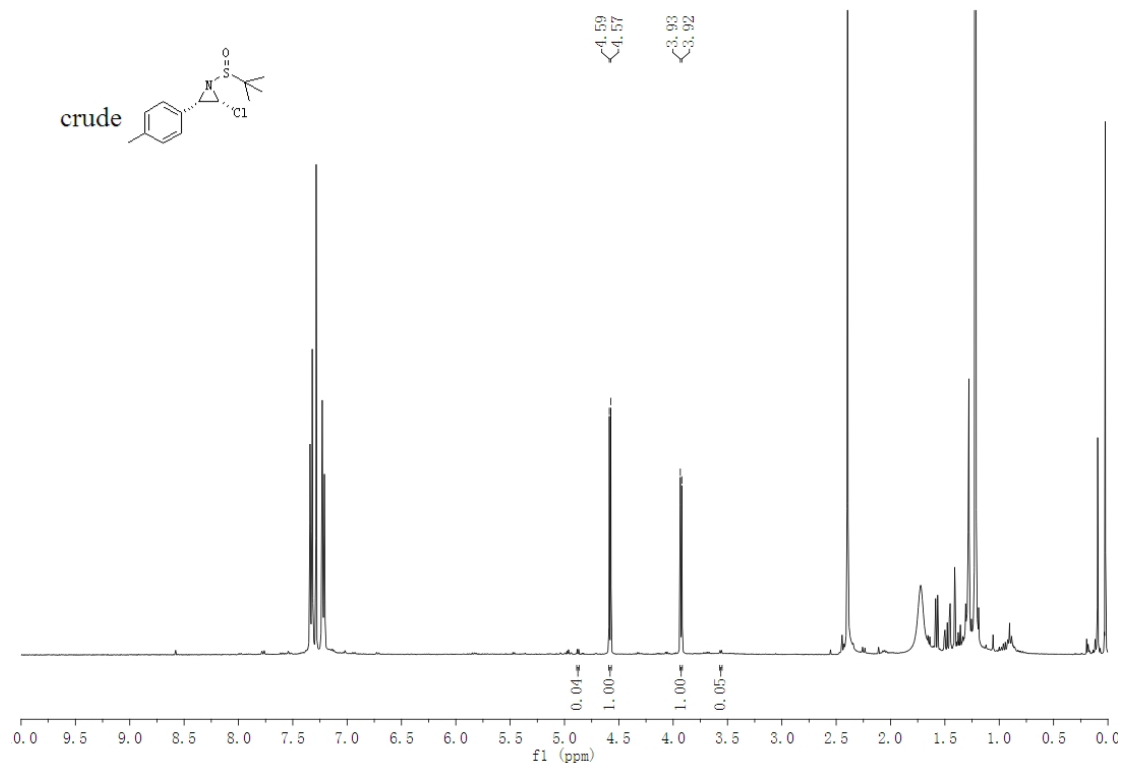

## <sup>1</sup>H NMR of crude product **5b**

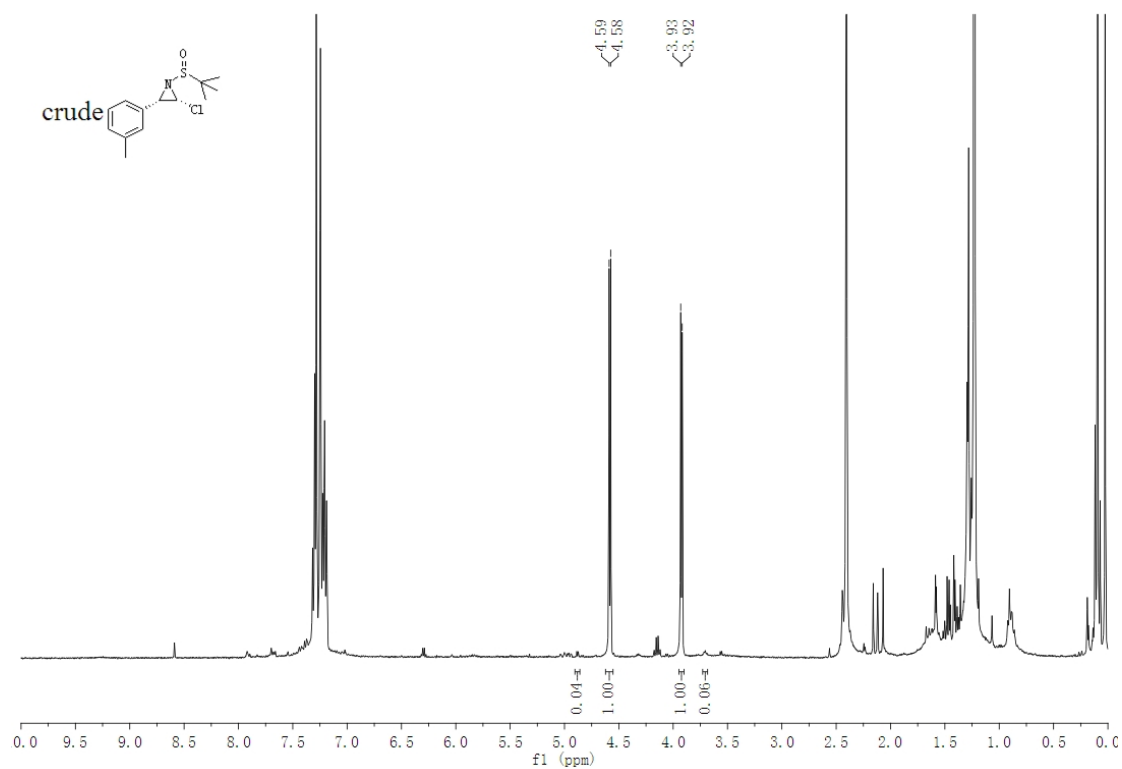

### <sup>1</sup>H NMR of crude product **5c**

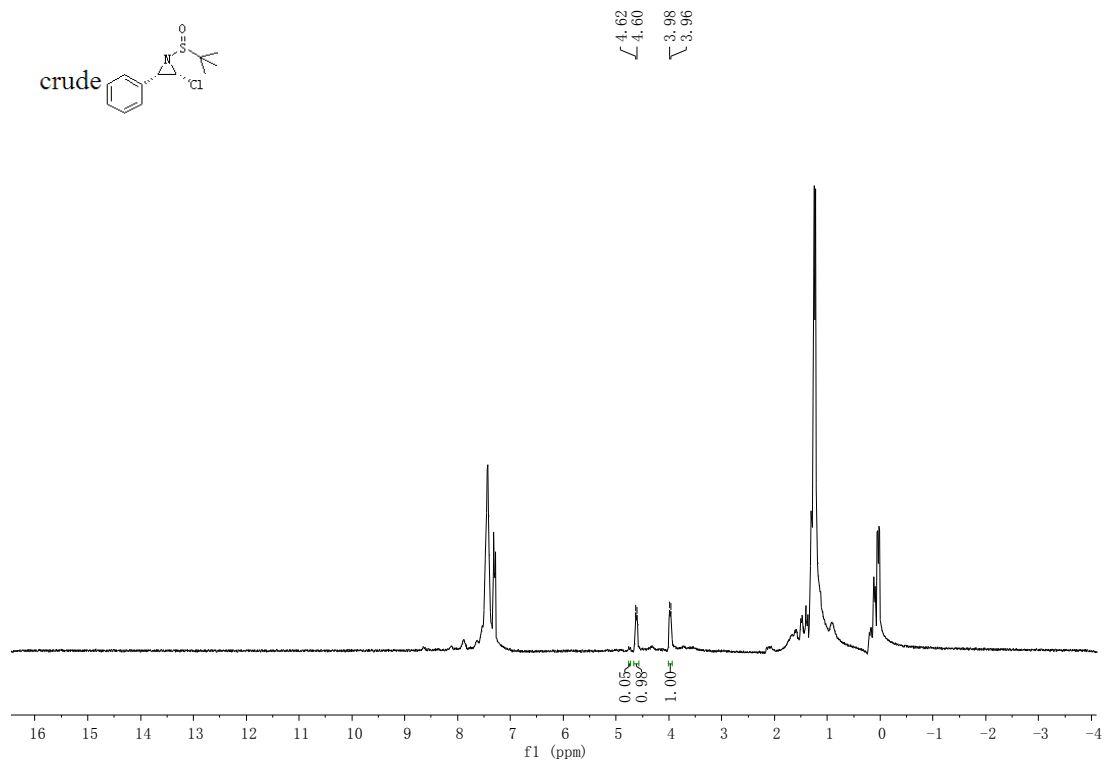

### <sup>1</sup>H NMR of crude product **5d**

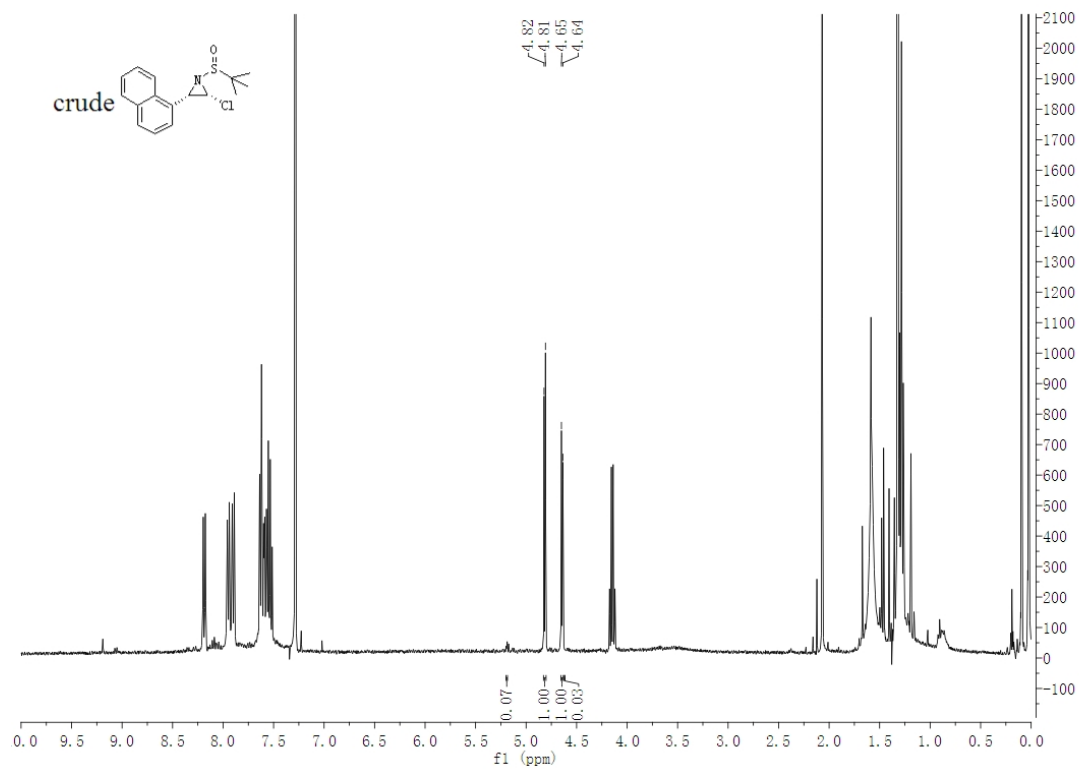

### <sup>1</sup>H NMR of crude product **5e**

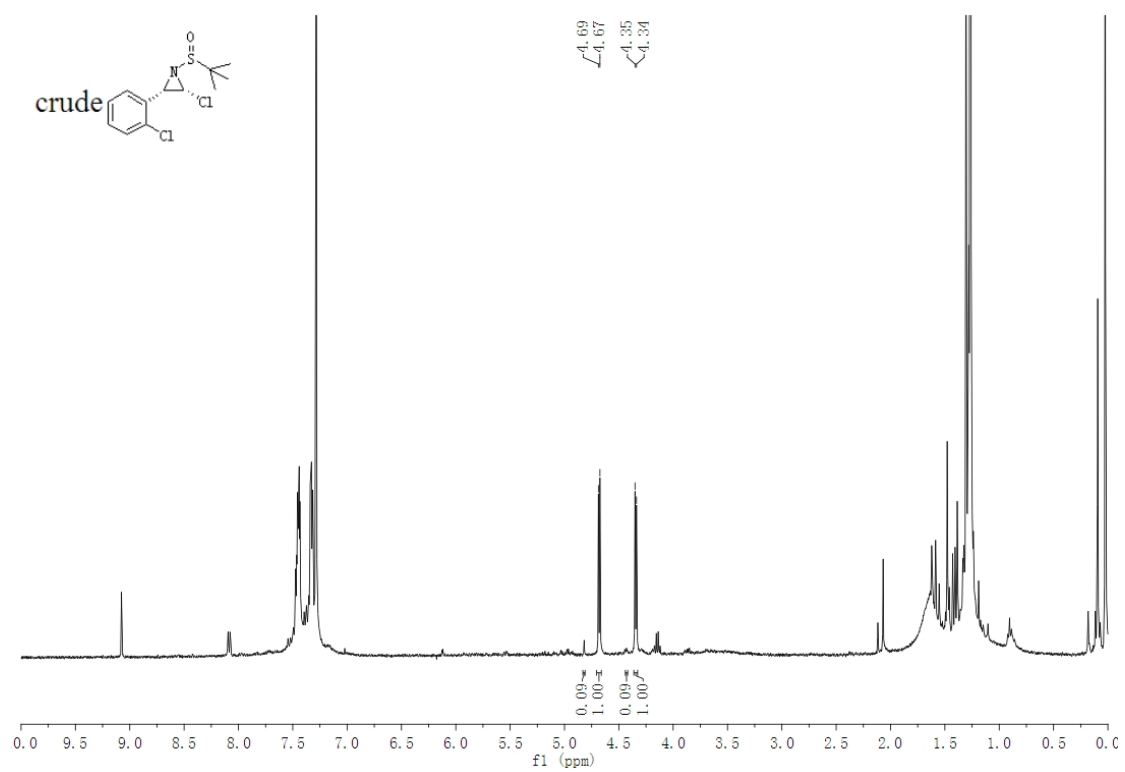

### <sup>1</sup>H NMR of crude product **5f**

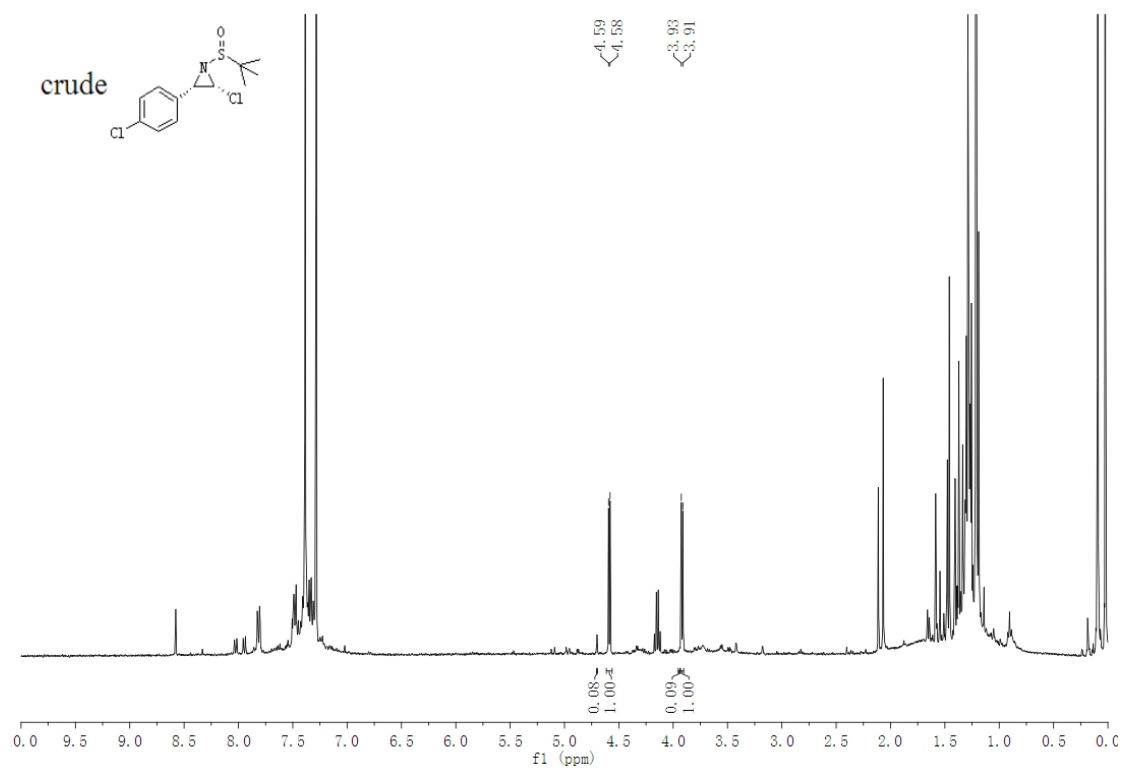

# <sup>1</sup>H NMR of crude product 3a via radical mono-dechlorination of compound 6a

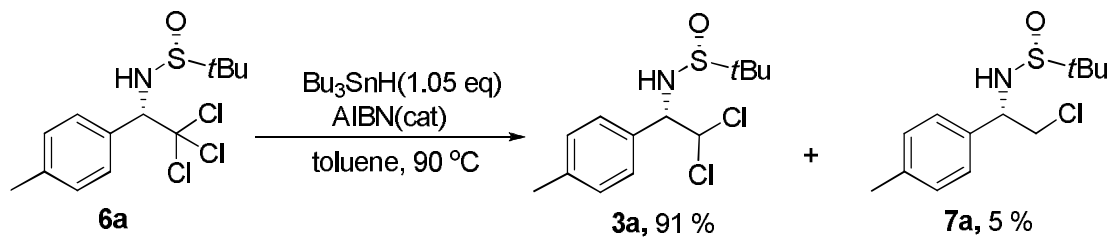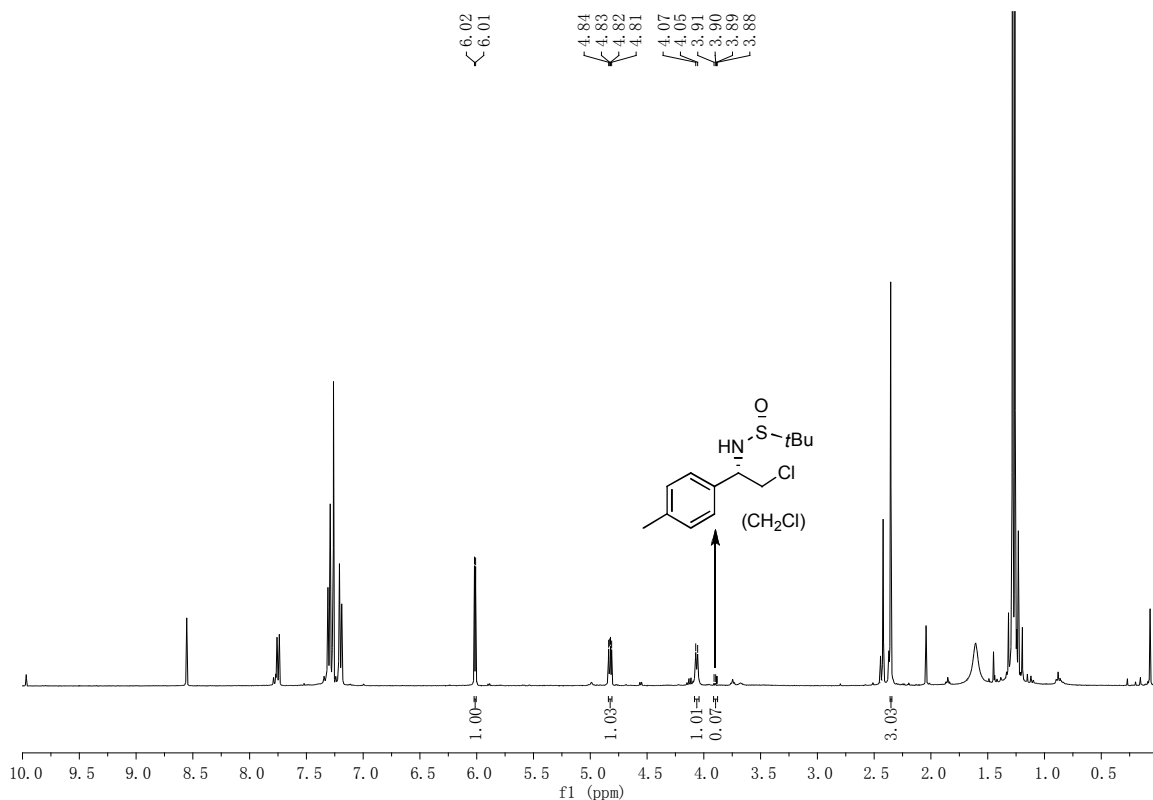

## LC-MS spectra of the crude products 3

**3a**,  $rt = 9.38$  min; the other diastereomer,  $rt = 9.10$  min

$dr = 59.7 : 0.9 = 98 : 2$

**1a)** HPLC  
spectroscopy

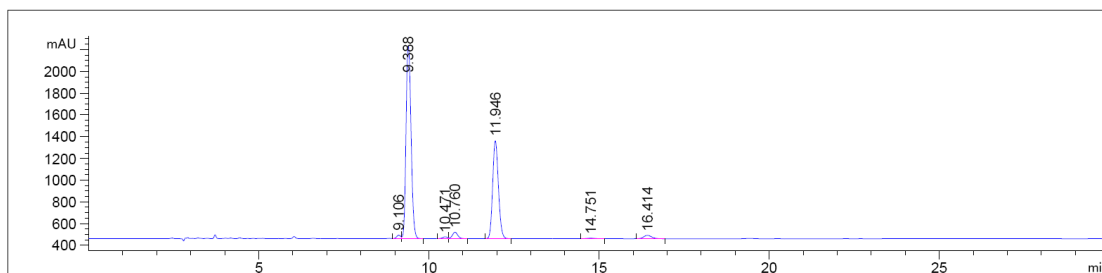

**1b)** Total ion  
current  
chromatogram

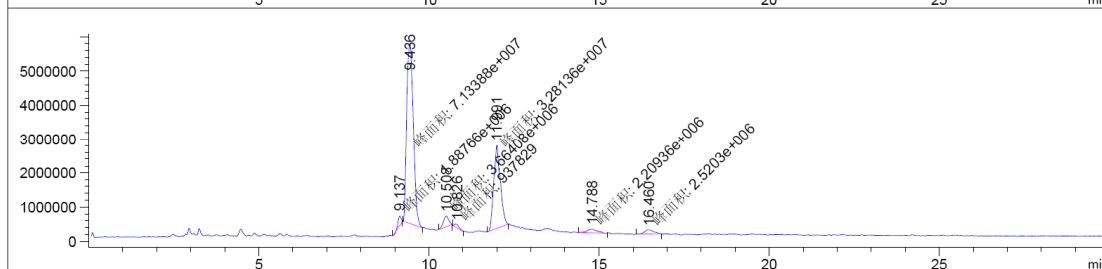

**1c)** Selected ion

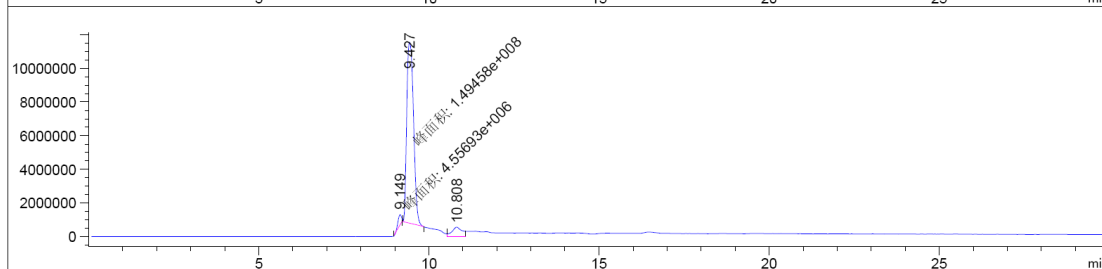

**3c**,  $rt = 9.27$  min; the other diastereomer,  $rt = 8.91$  min

$dr = 98.8 : 1.11 = 98 : 2$

**1a)** HPLC  
spectroscopy

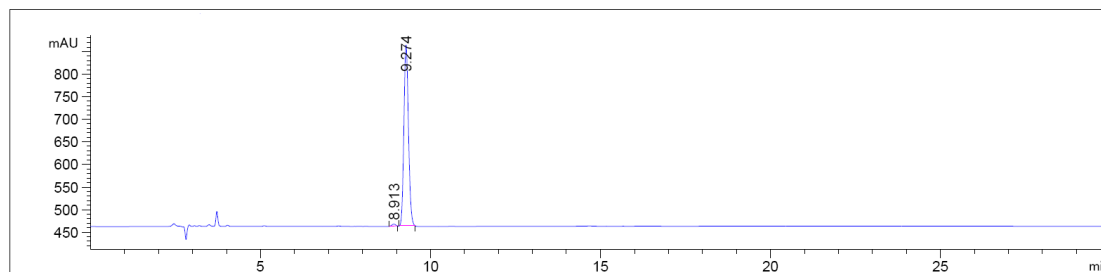

**1b)** Total ion  
current  
chromatogram

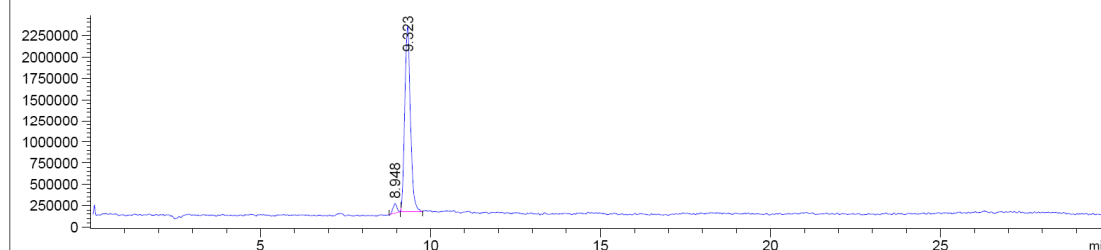

**1c)** Selected ion

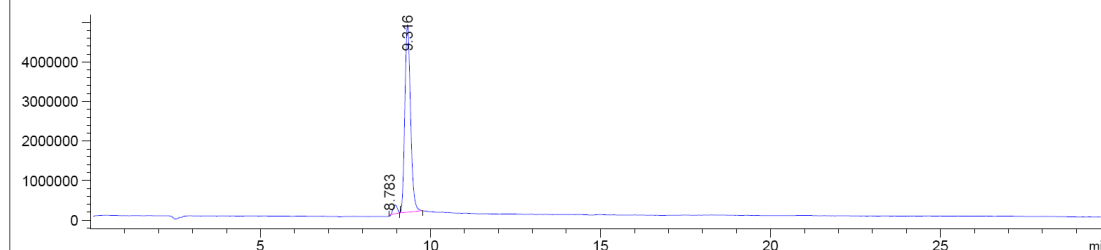



**3d**,  $rt = 6.00$  min; the other diastereomer,  $rt = 5.67$  min

$dr = 9591 : 212 = 98 : 2$

**1a)** HPLC  
spectroscopy

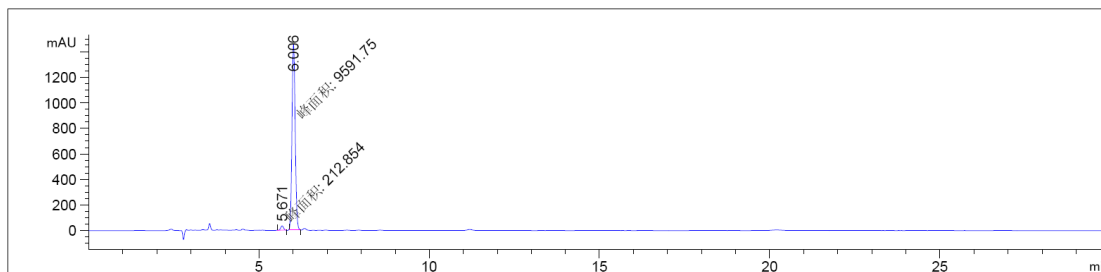

**1b)** Total ion  
current  
chromatogram

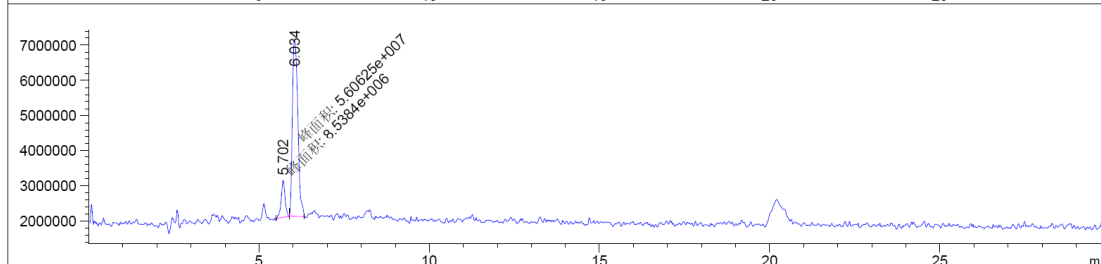

**1c)** Selected ion

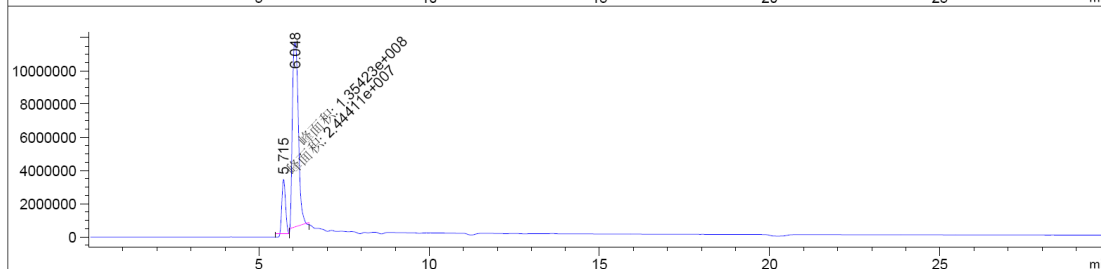

**3e**,  $rt = 7.27$  min; the other diastereomer,  $rt = 7.02$  min  
 $dr = 98.06 : 1.06 = 98 : 2$

**1a)** HPLC  
spectroscopy

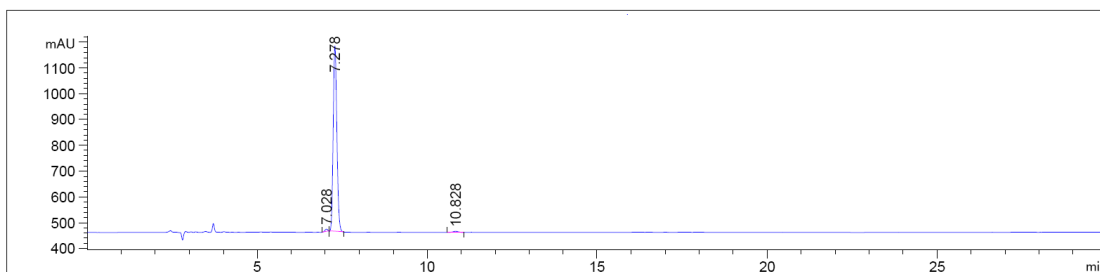

**1b)** Total ion  
current  
chromatogram

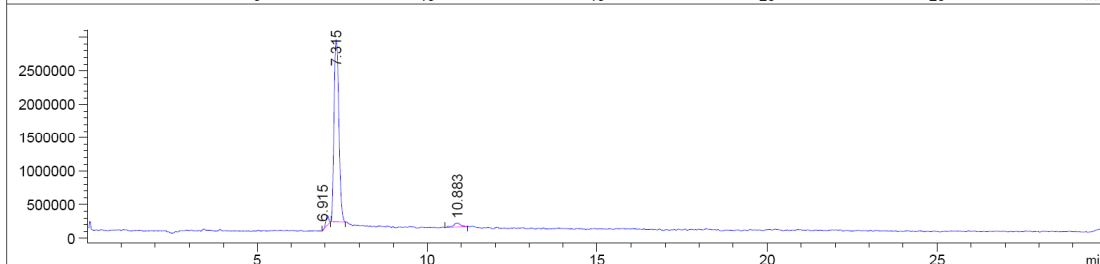

**1c)** Selected ion

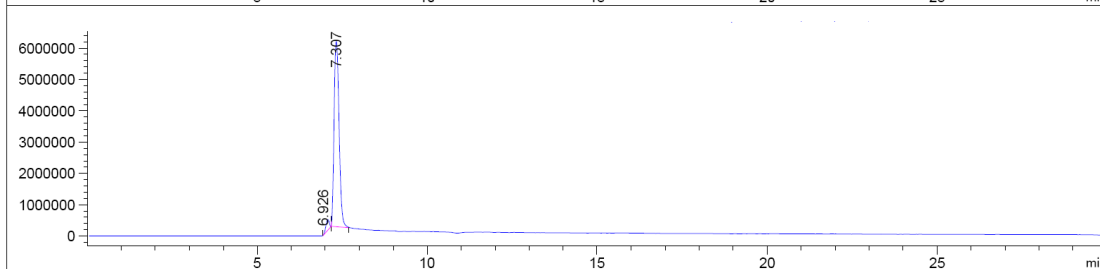

**3f**,  $rt = 7.60$  min; the other diastereomer,  $rt = 7.87$  min  
 $dr = 6118 : 59.8 = 98 : 2$

**1a)** HPLC  
spectroscopy

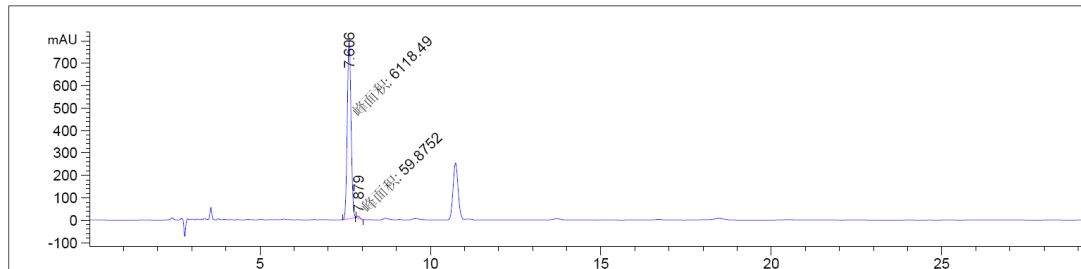

**1b)** Total ion  
current  
chromatogram

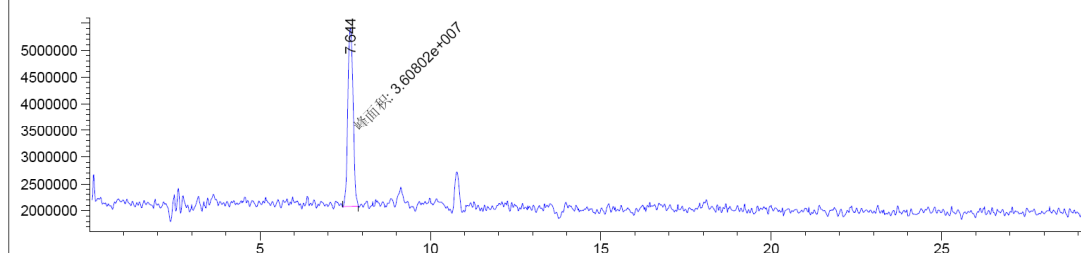

**1c)** Selected ion

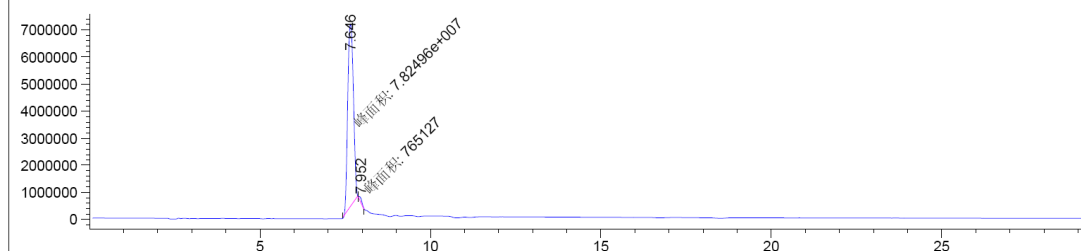

**3g**,  $rt = 8.07$  min; the other diastereomer,  $rt = 7.19$  min  
 $dr = 5766 : 74 = 98 : 2$

**1a)** HPLC  
spectroscopy

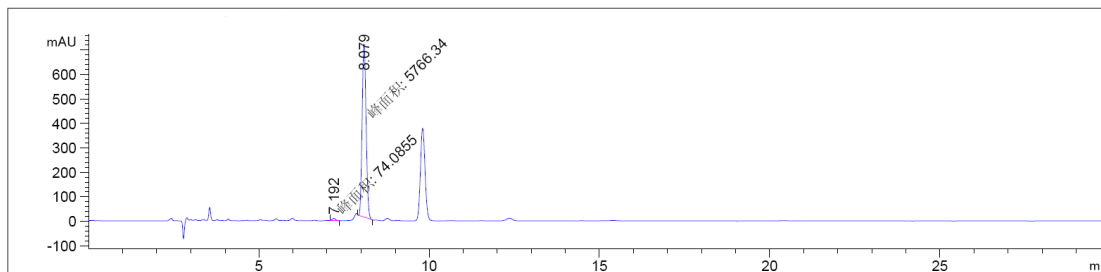

**1b)** Total ion  
current  
chromatogram

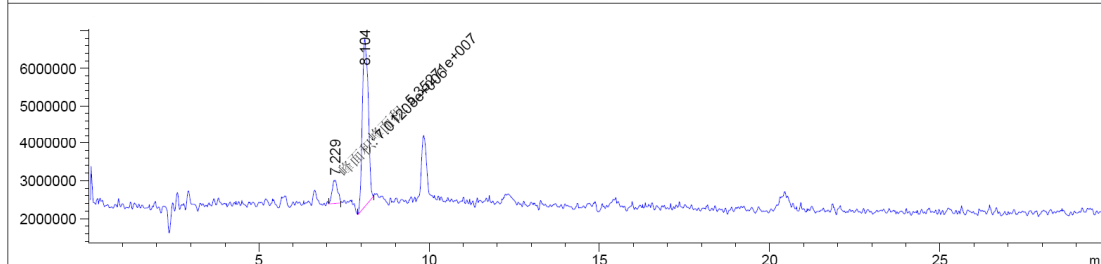

**1c)** Selected ion

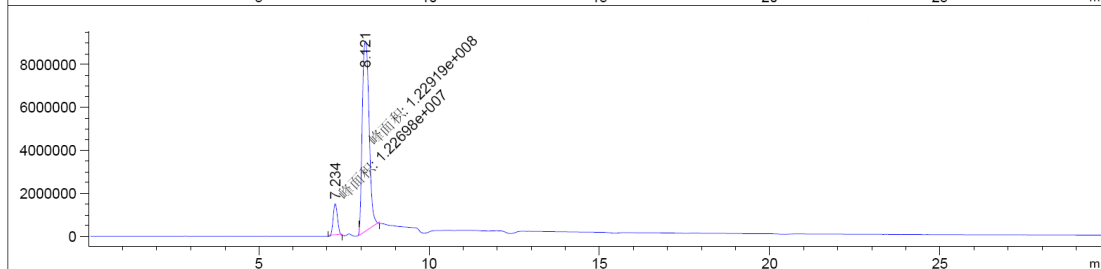

**3h**,  $rt = 10.85$  min; the other diastereomer,  $rt = 10.44$  min

$dr = 24.8 : 0.29 = 98 : 2$

**1a) HPLC**  
spectroscopy

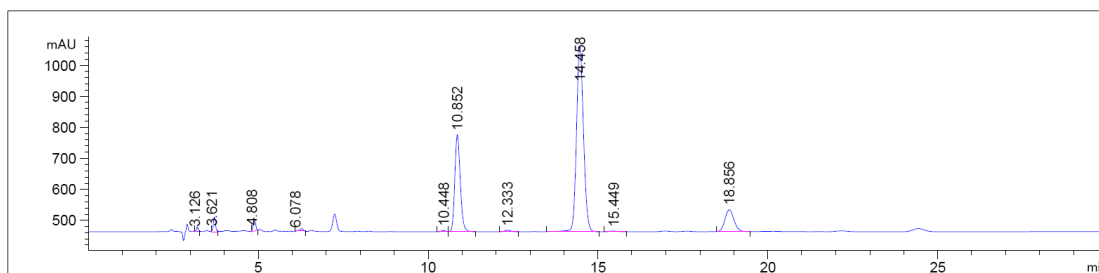

**1b) Total ion**  
current  
chromatogram

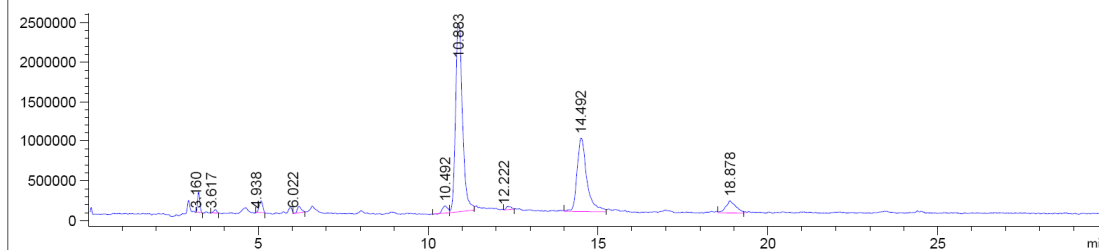

**1c) Selected ion**

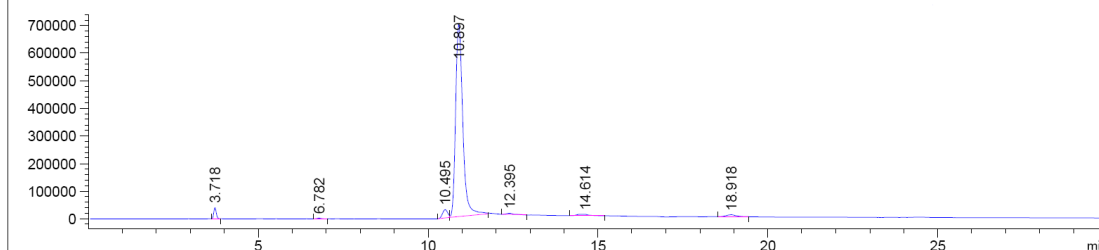

**3i**,  $rt = 8.59$  min; the other diastereomer,  $rt = 8.07$  min

$dr = 28231 : 571 = 98 : 2$

**1a) HPLC**  
spectroscopy

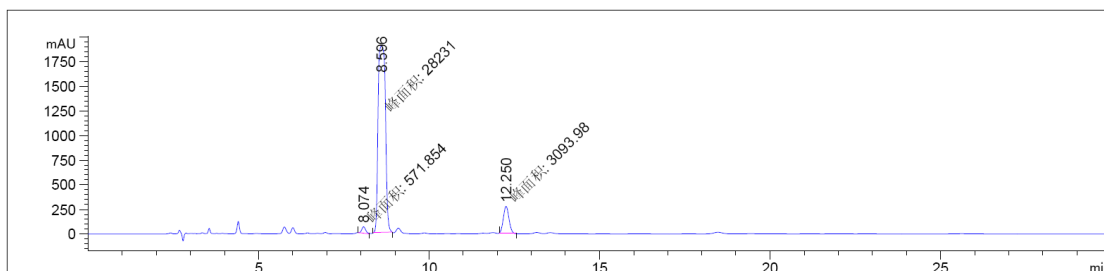

**1b) Total ion**  
current  
chromatogram

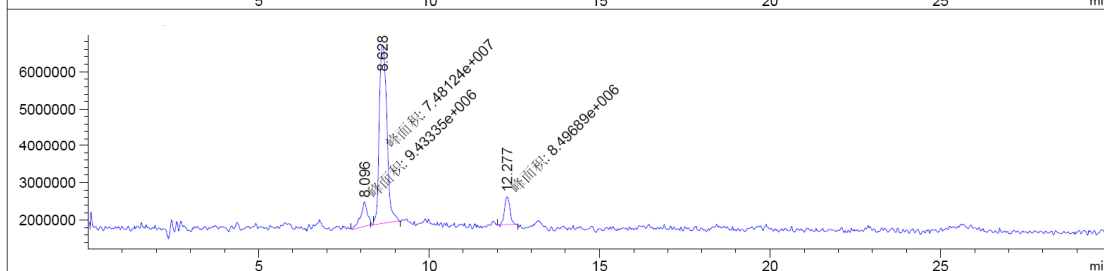

**1c) Selected ion**

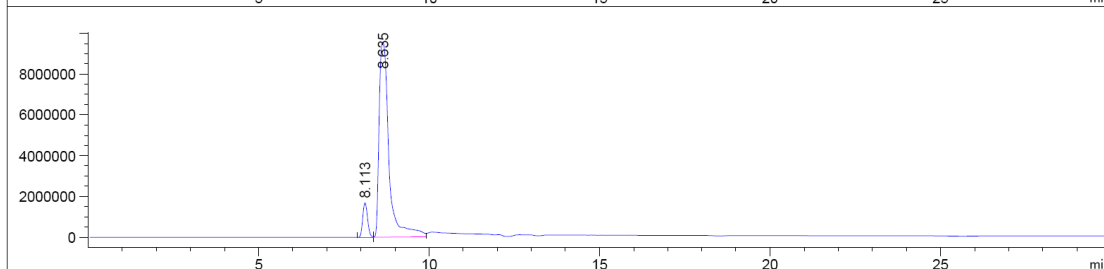

## NMR Spectra for all new products

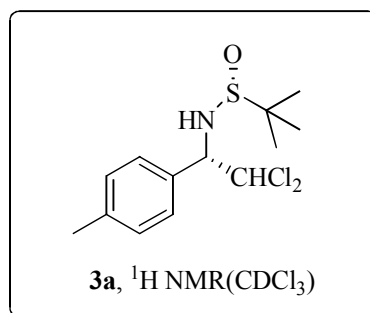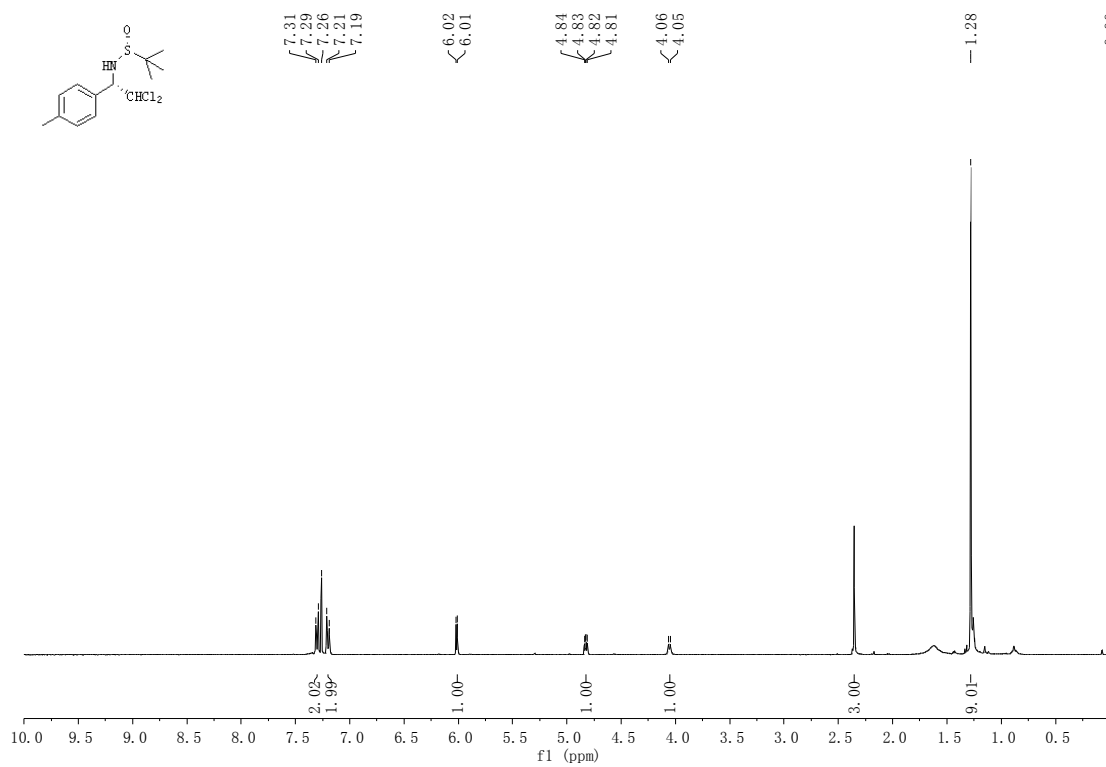

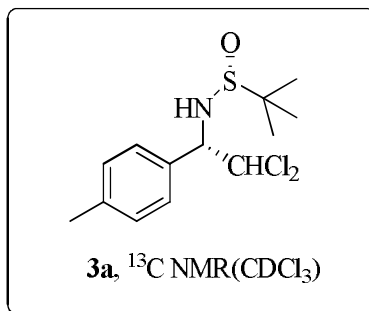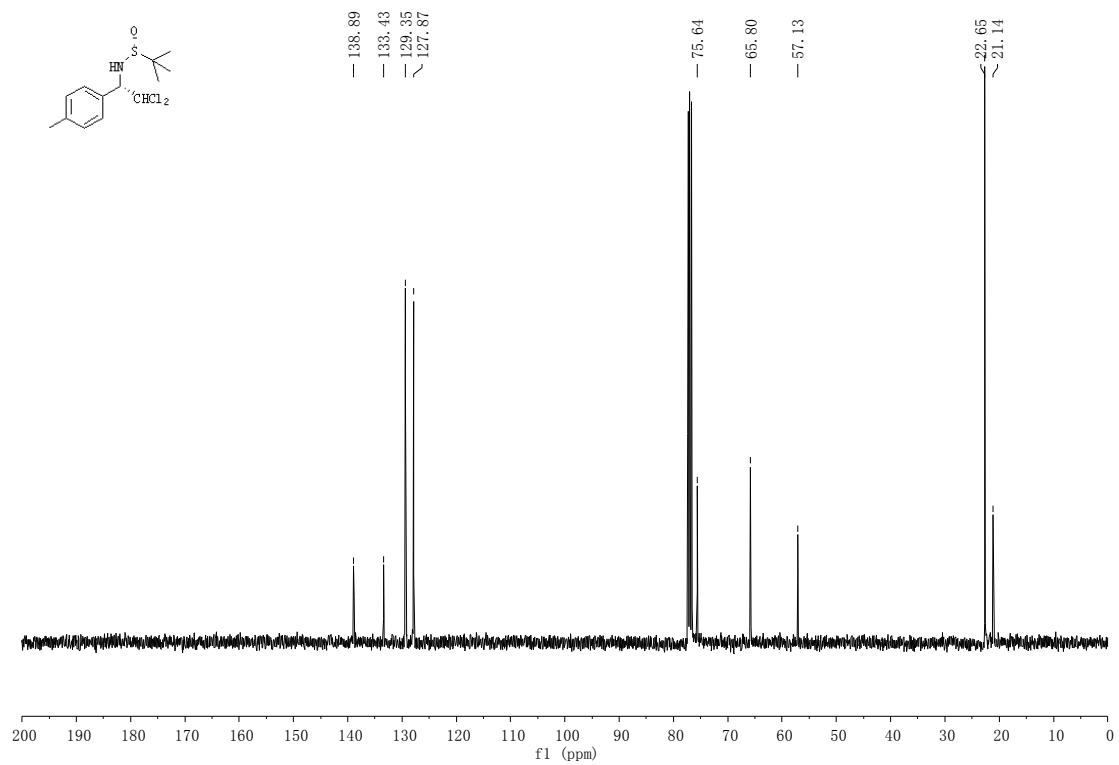



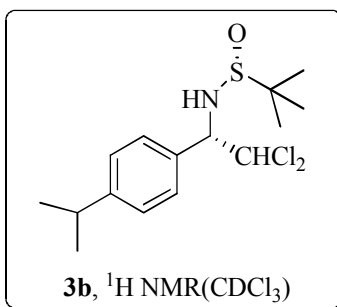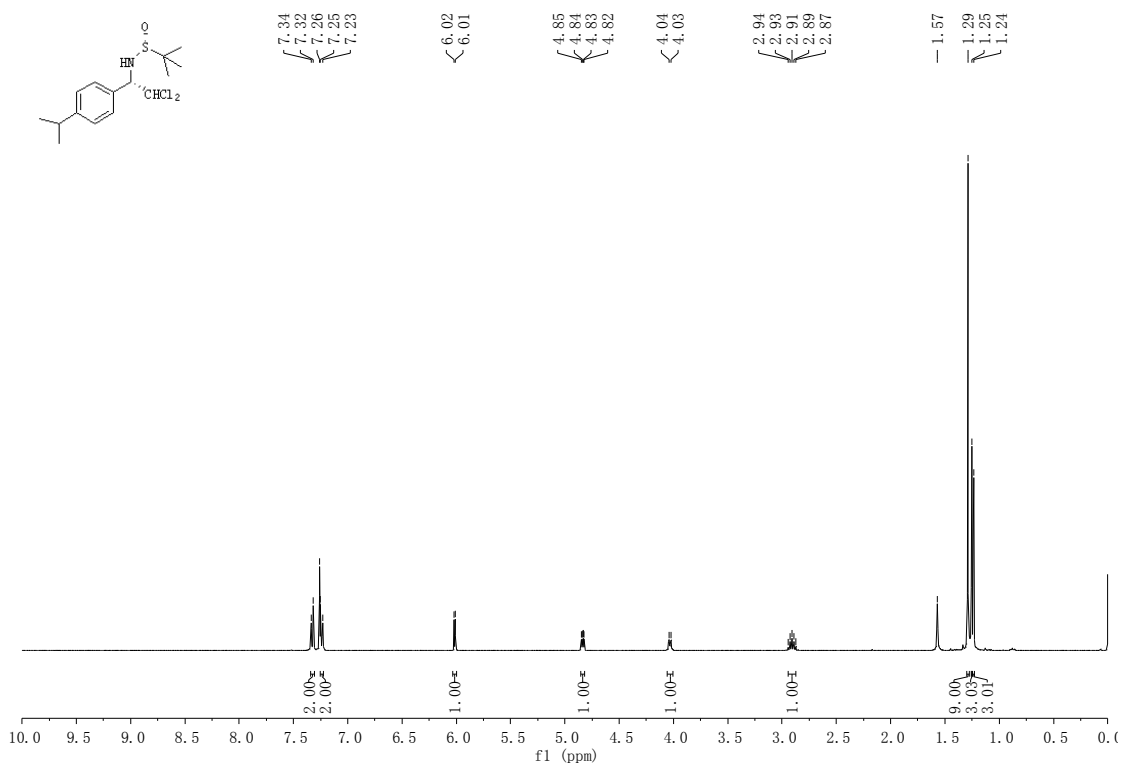

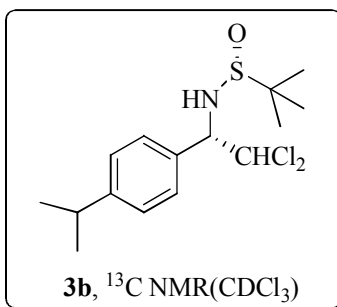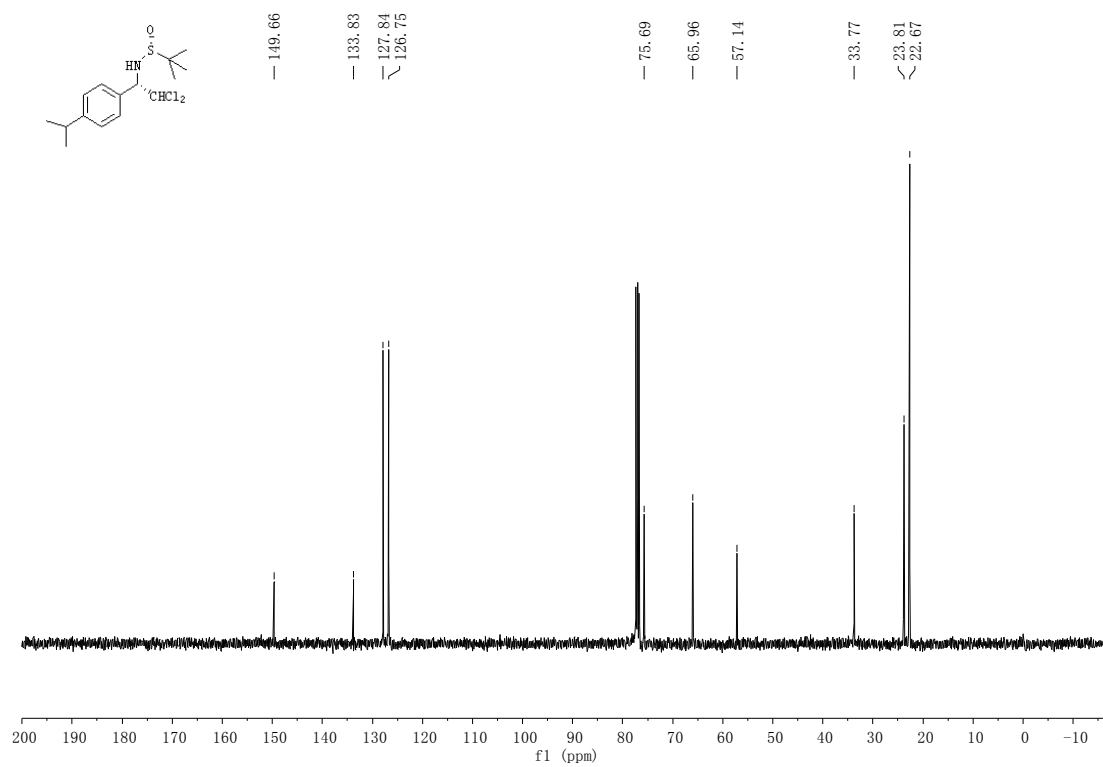

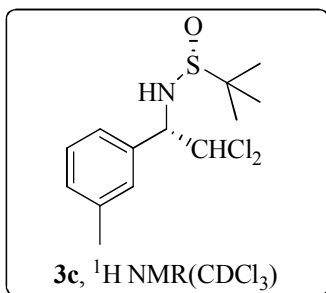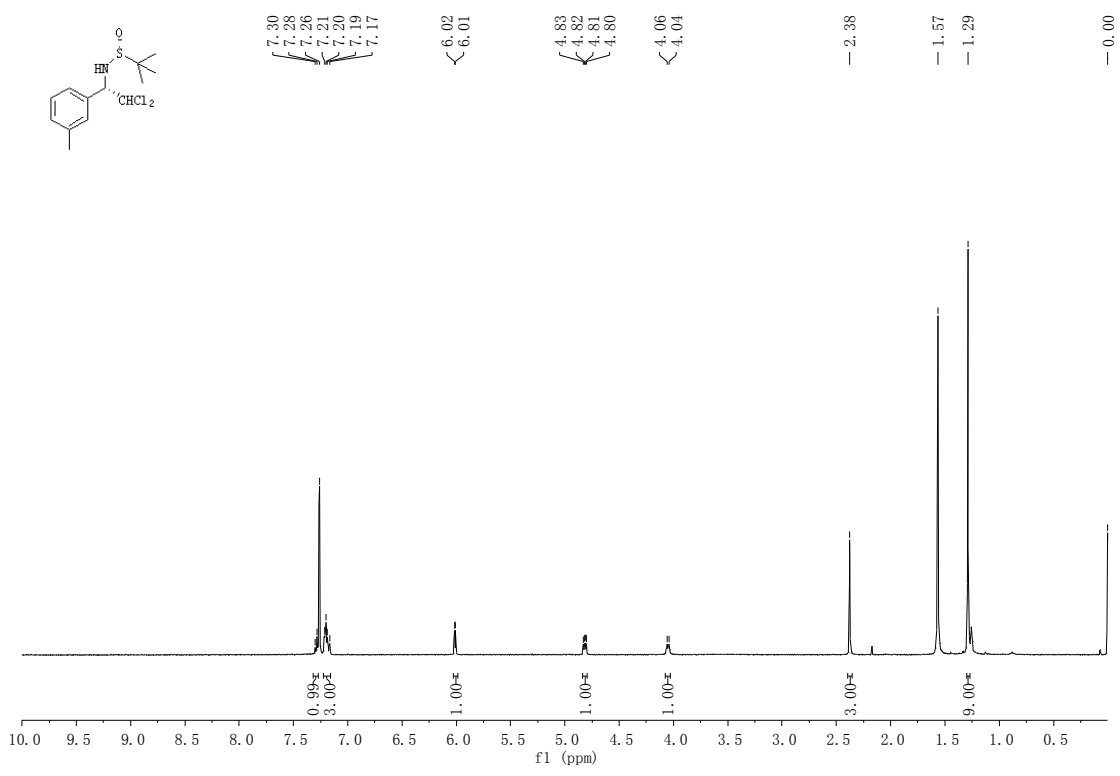

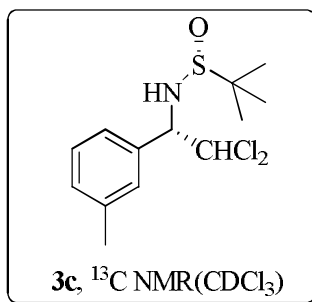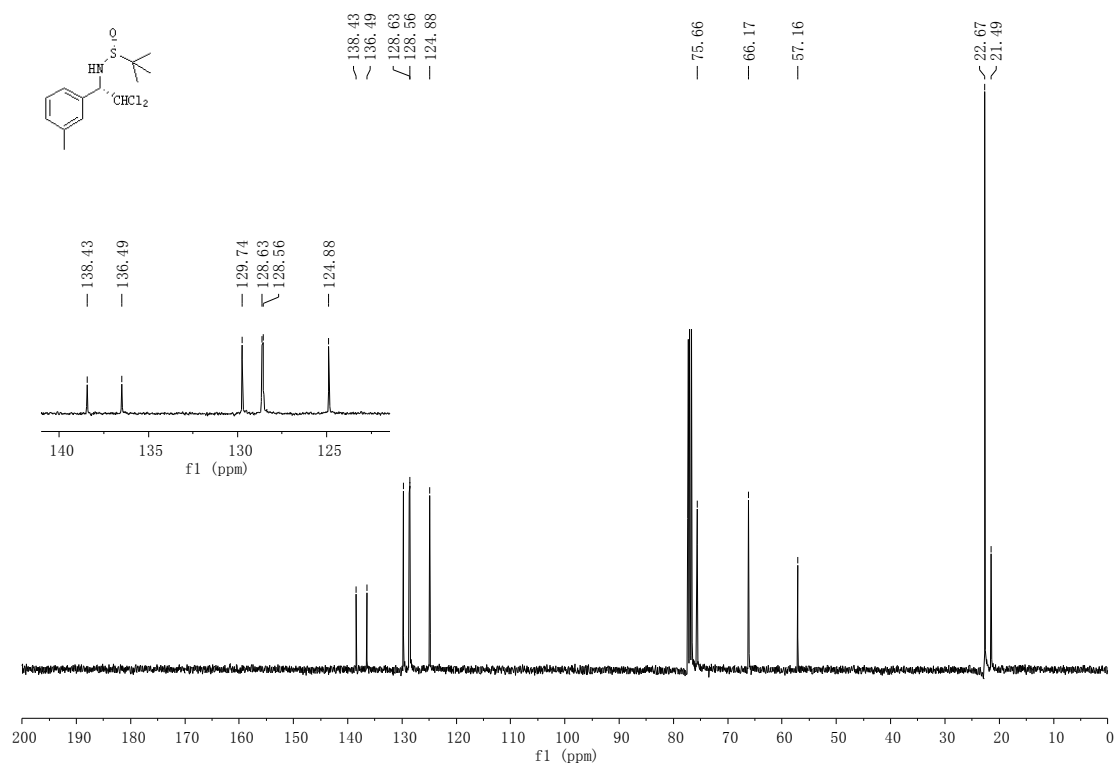

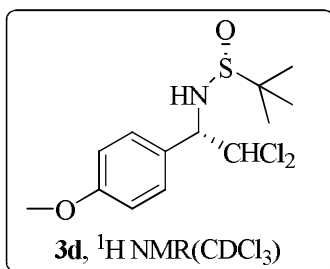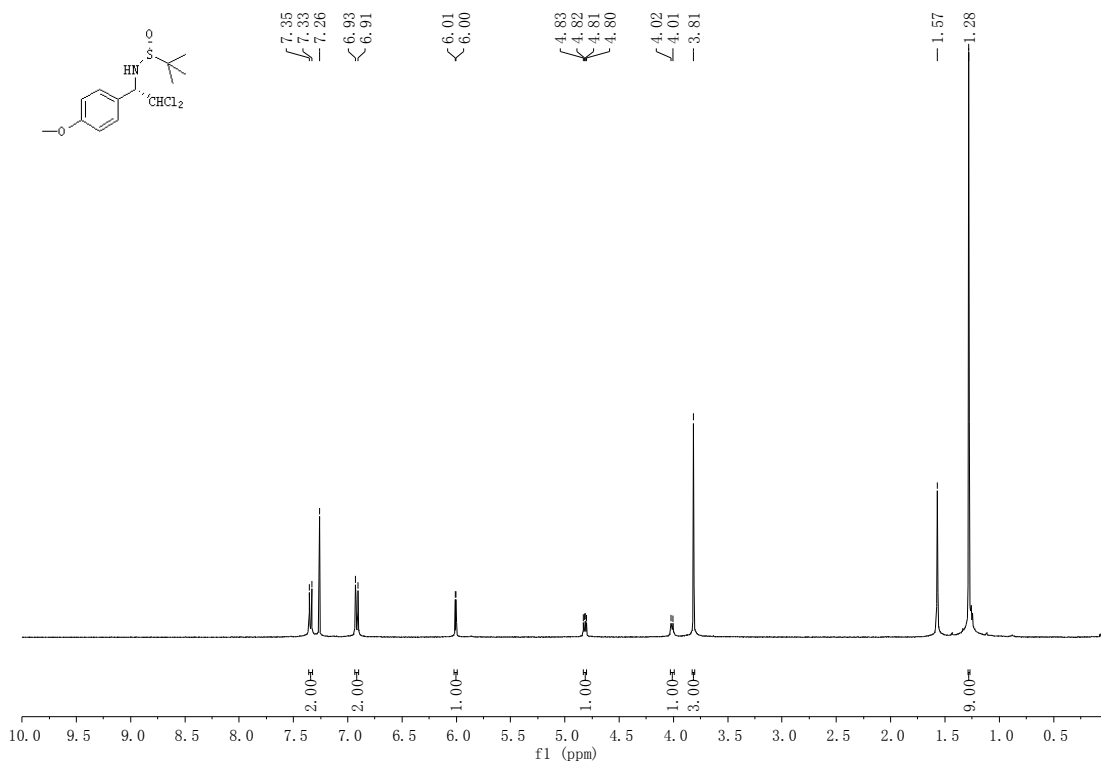

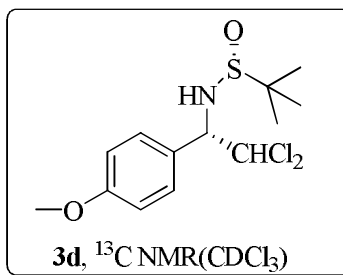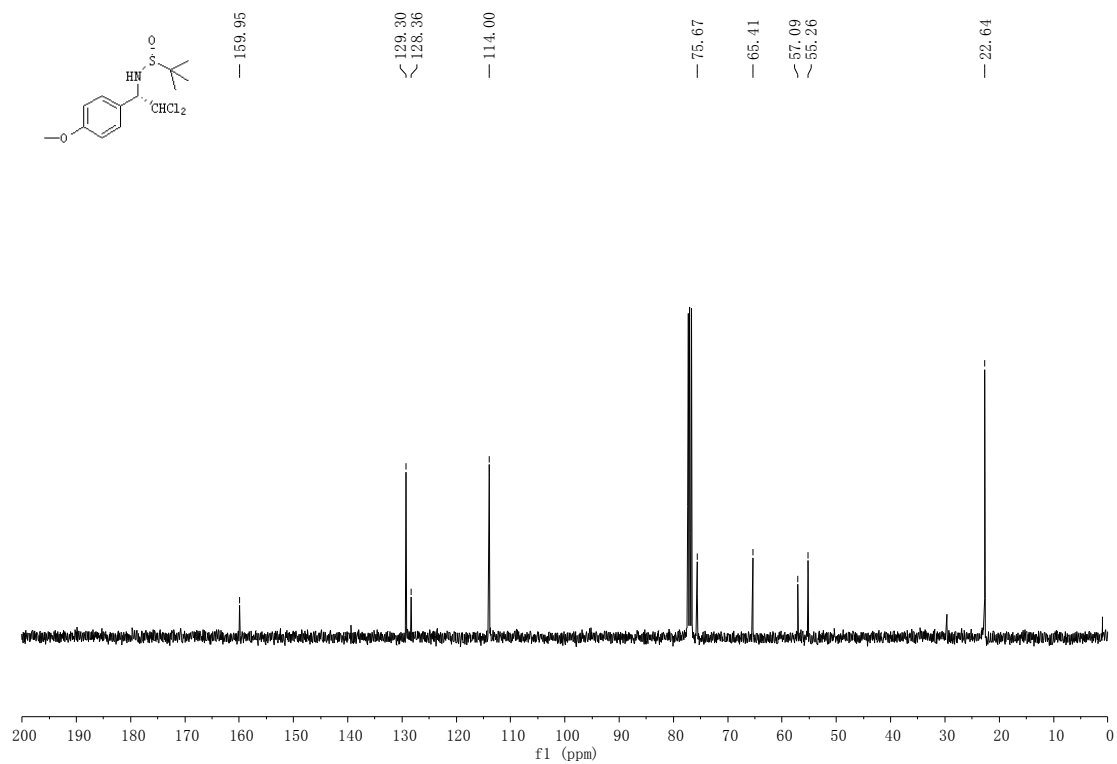

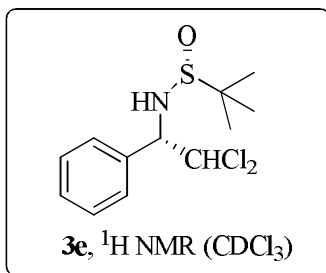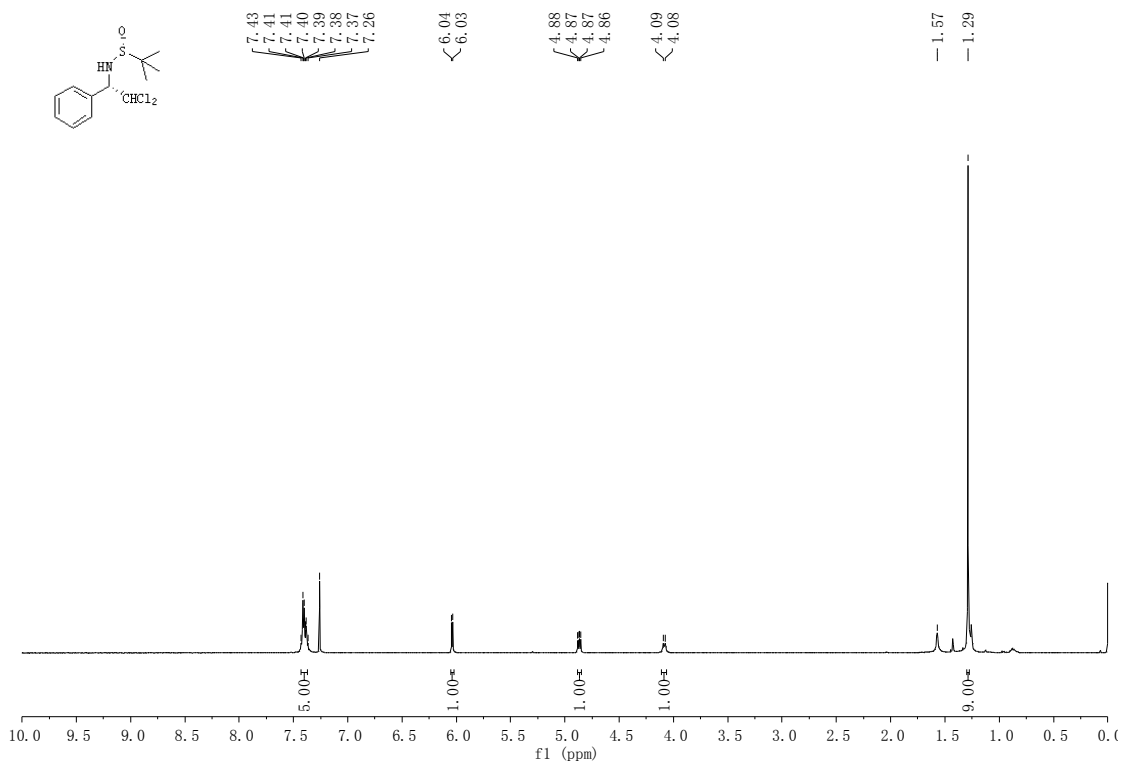

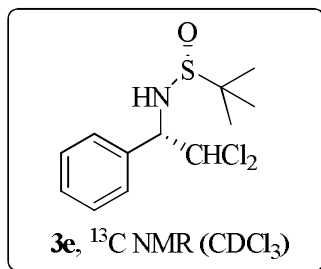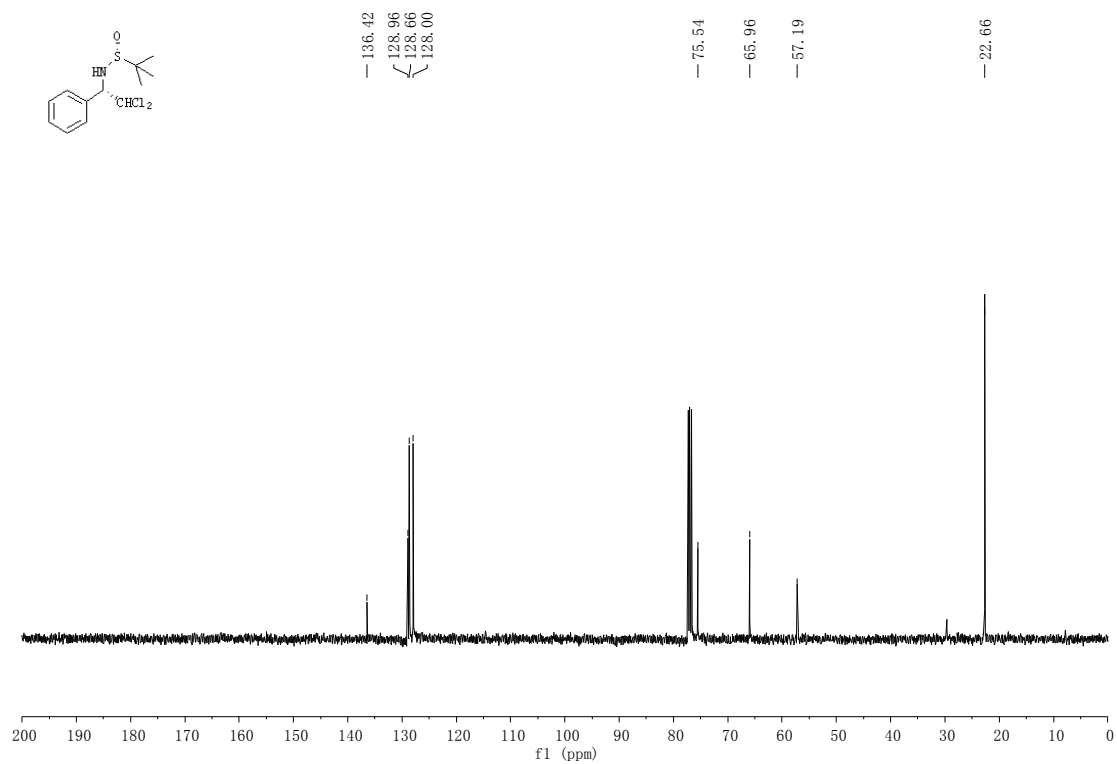



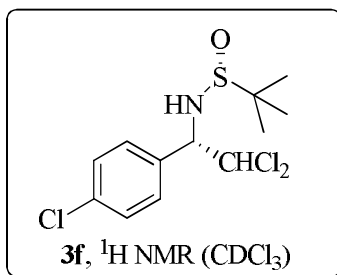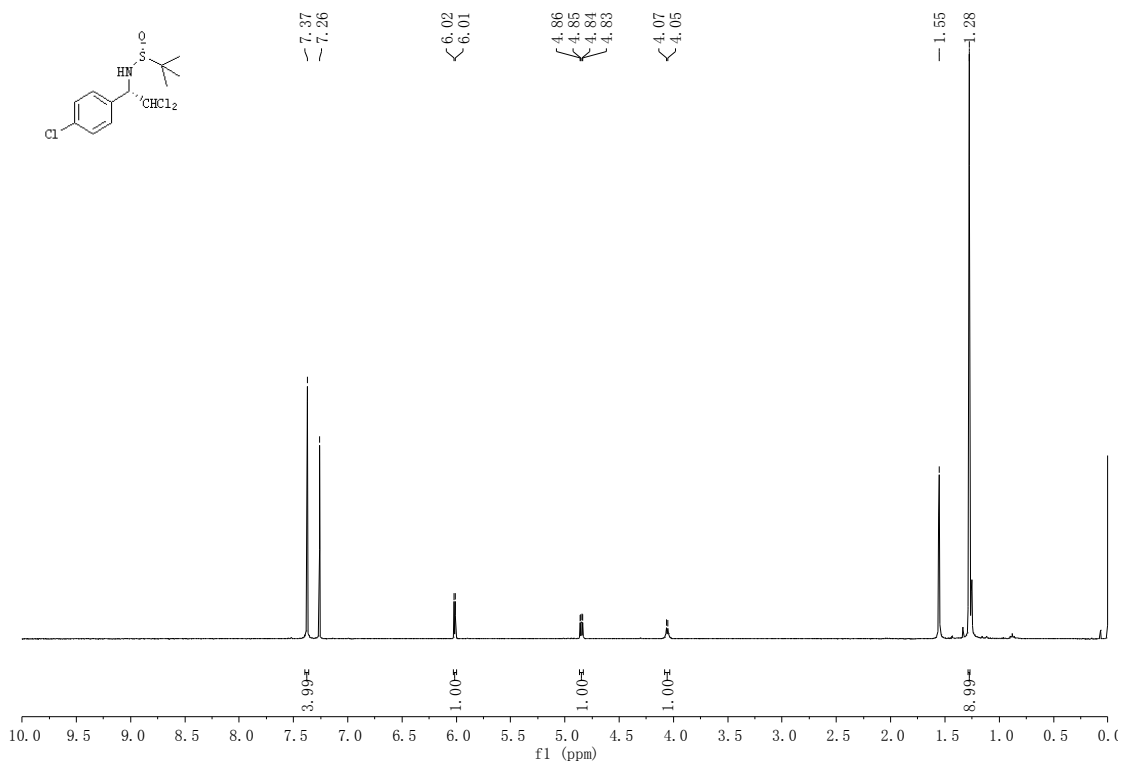

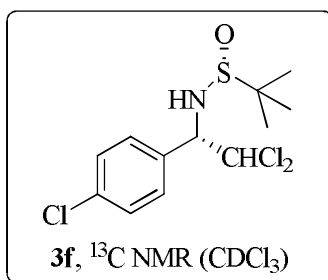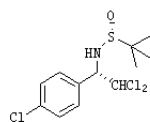

135.02  
134.72  
129.52  
128.83

75.11  
65.14  
57.26

22.60

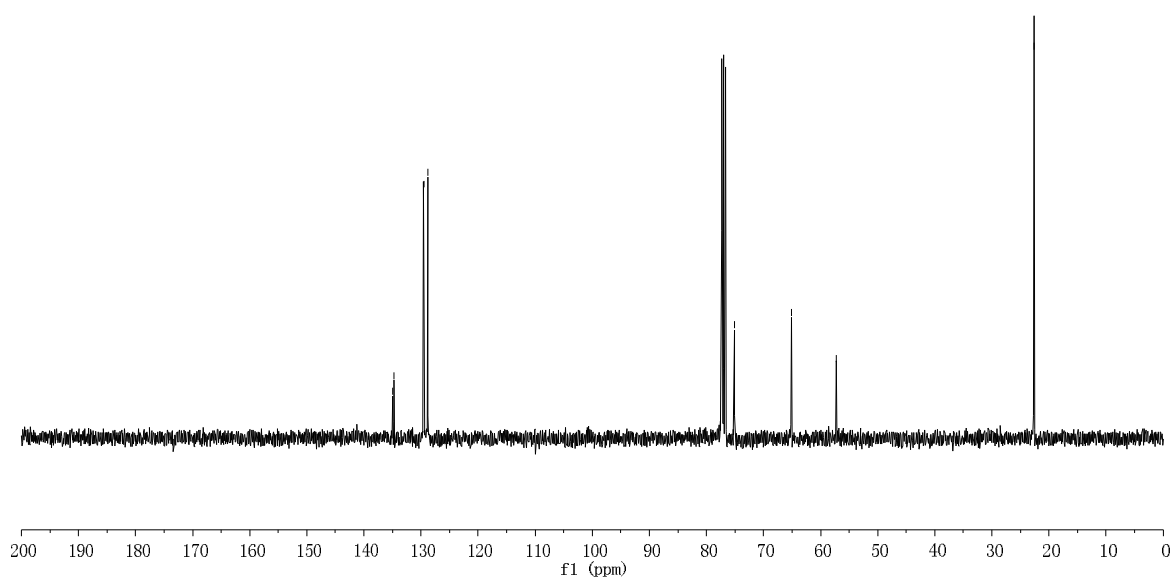

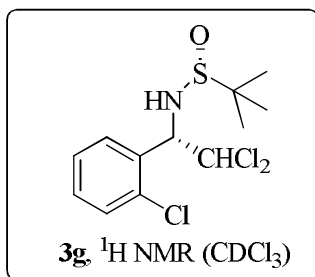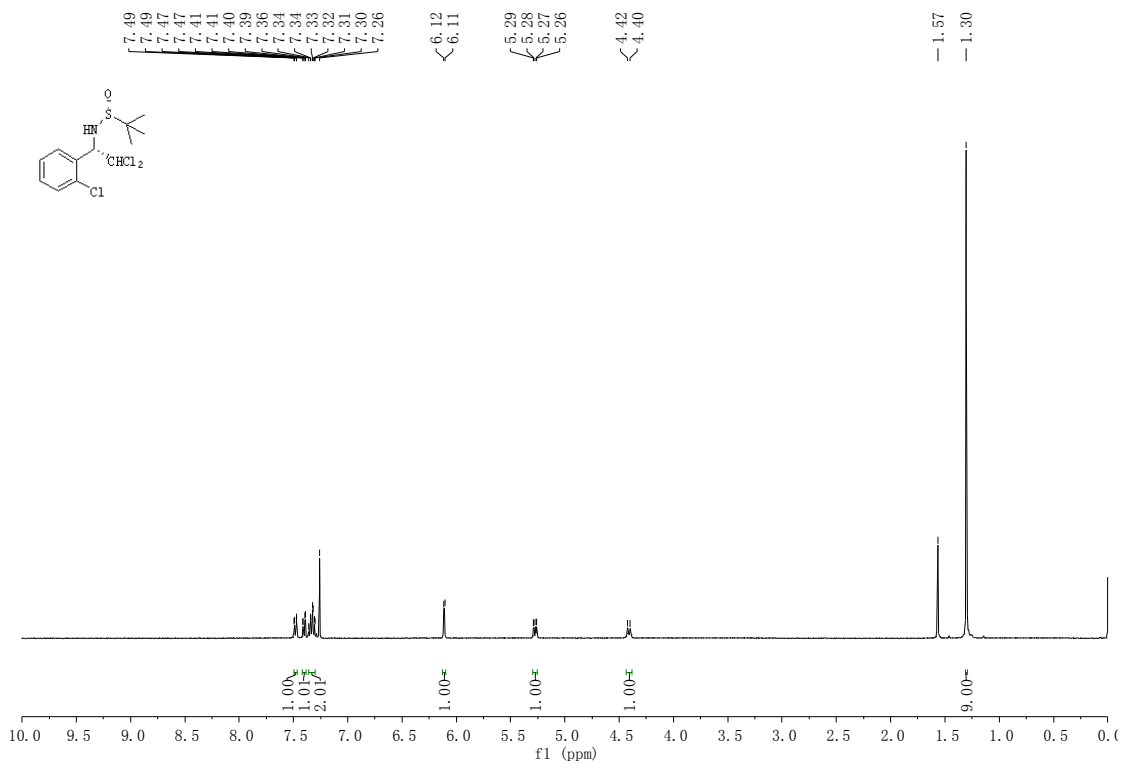

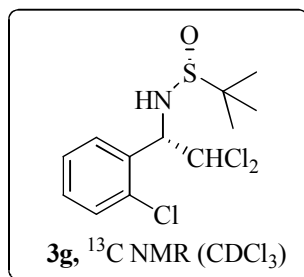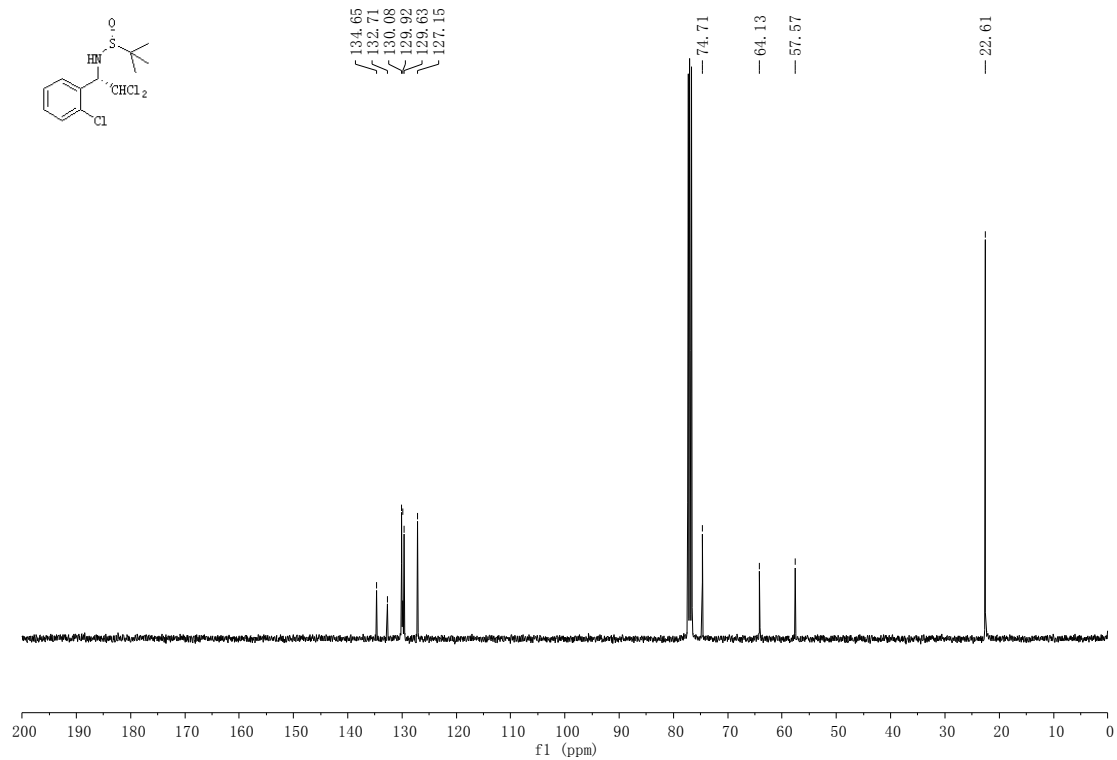

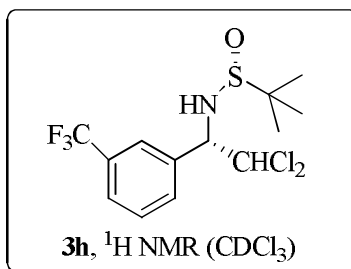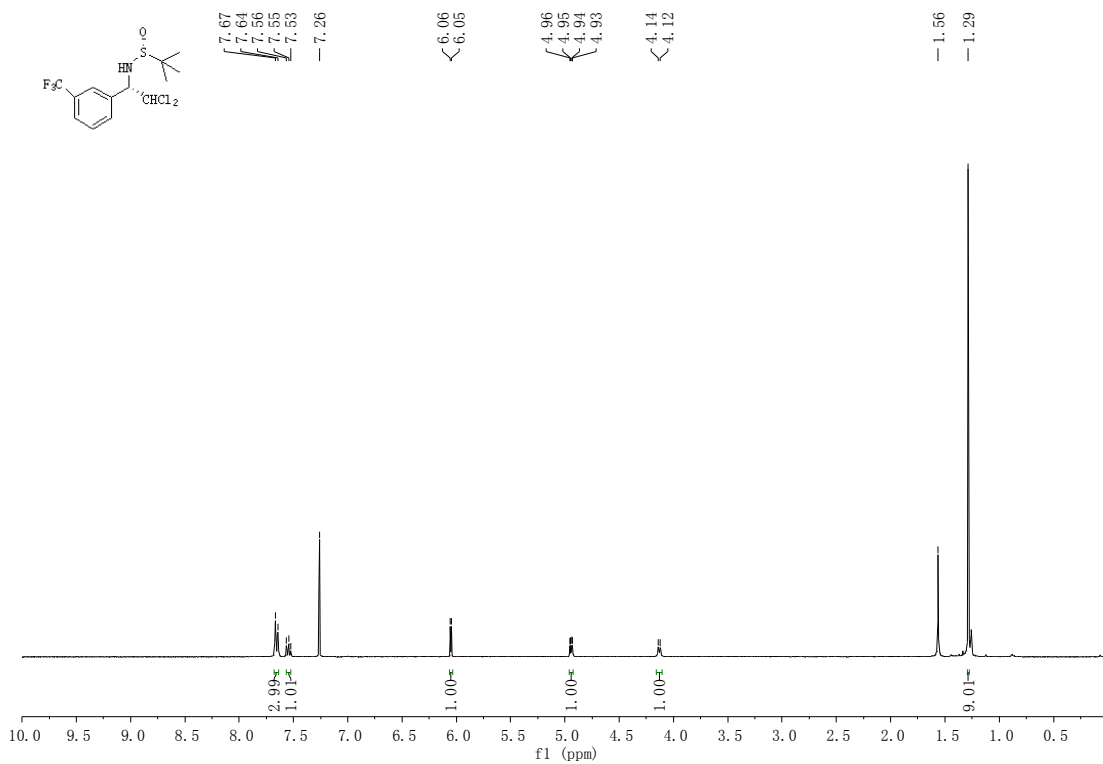

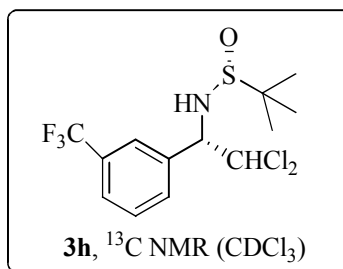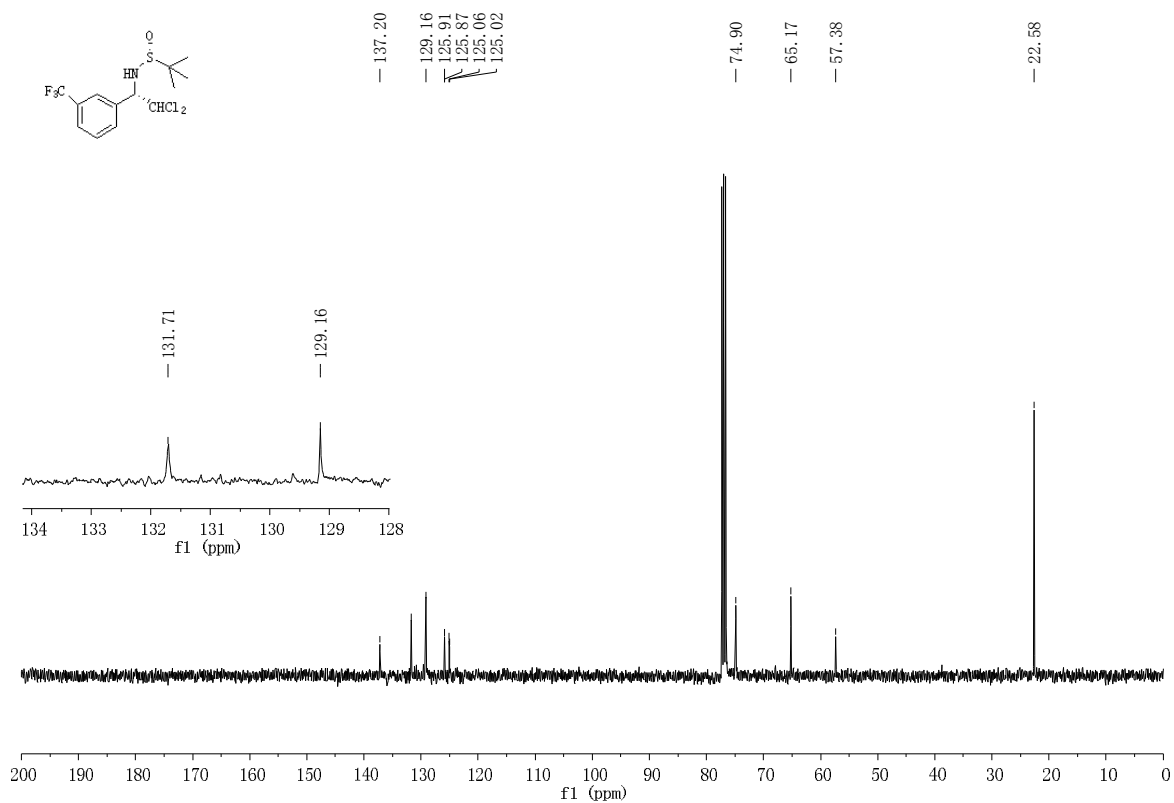

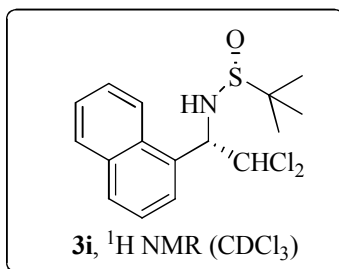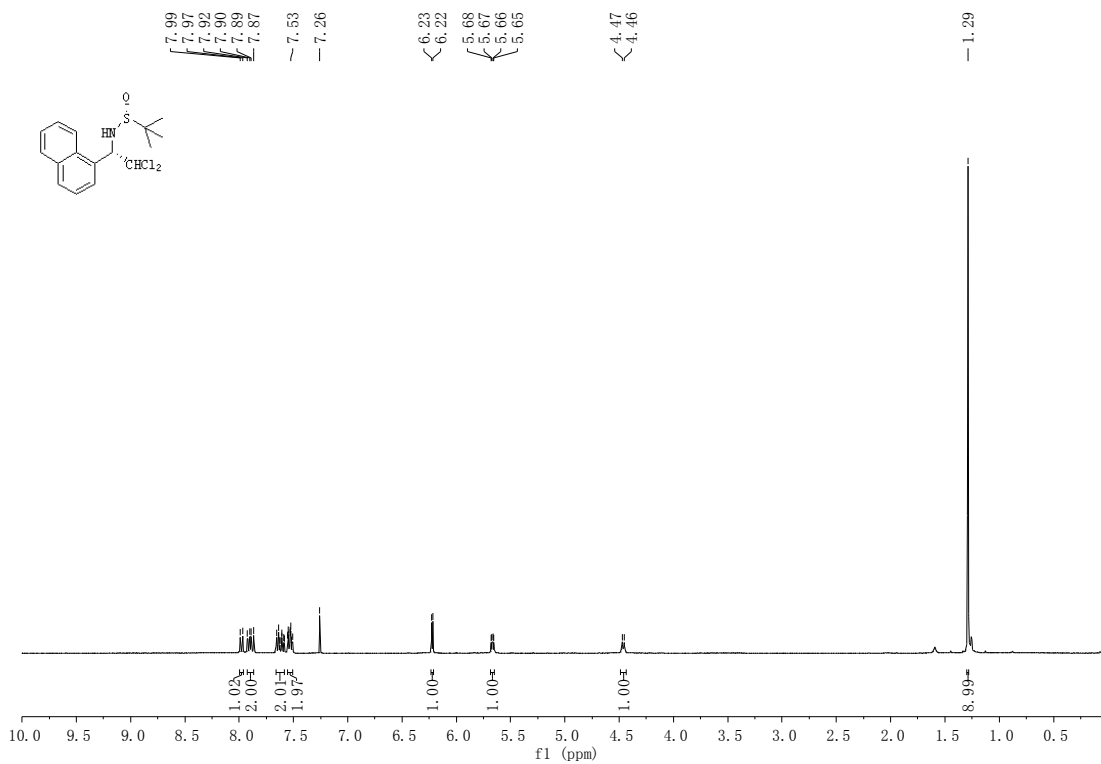

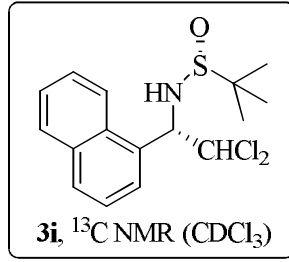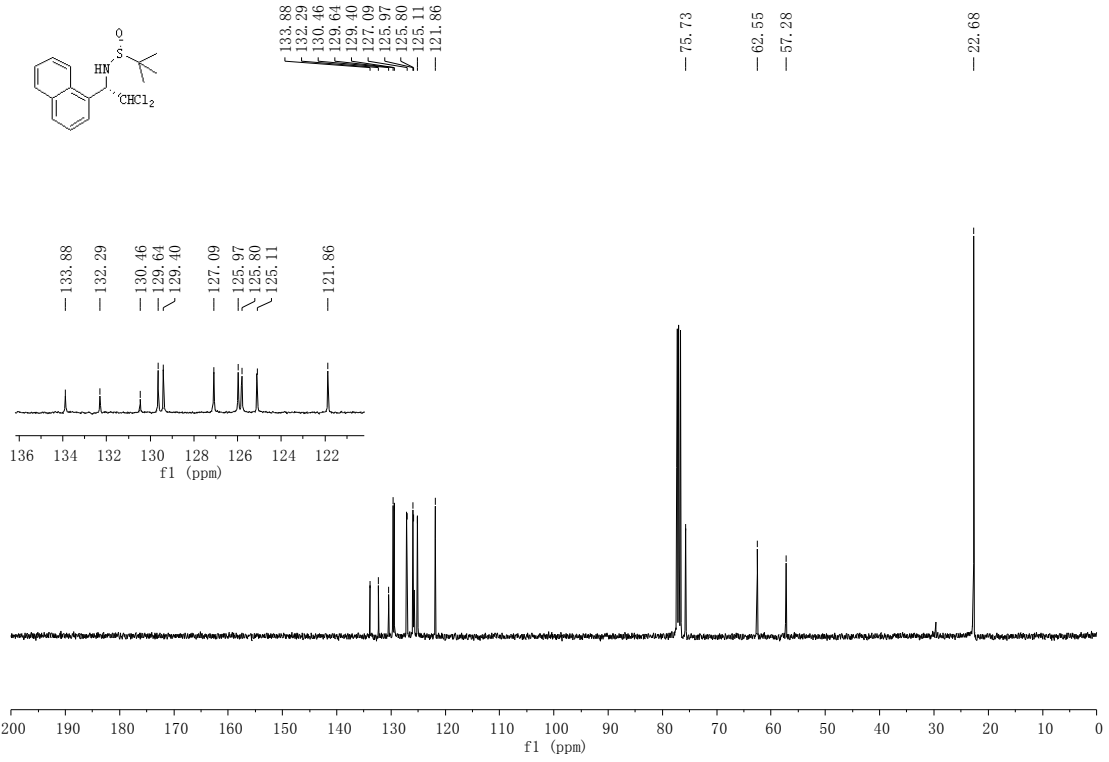



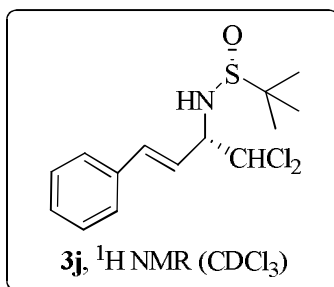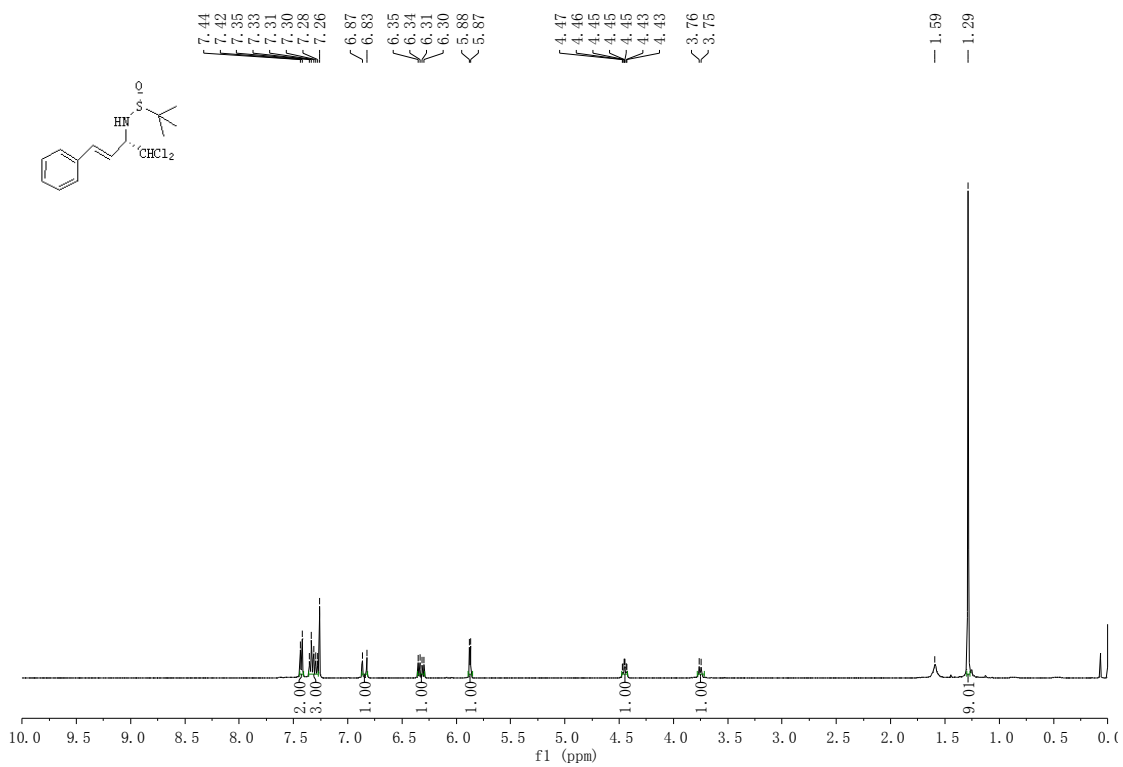

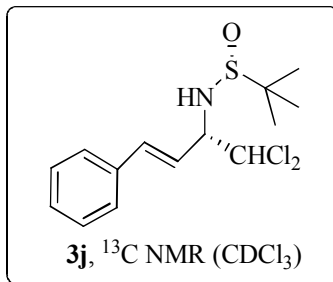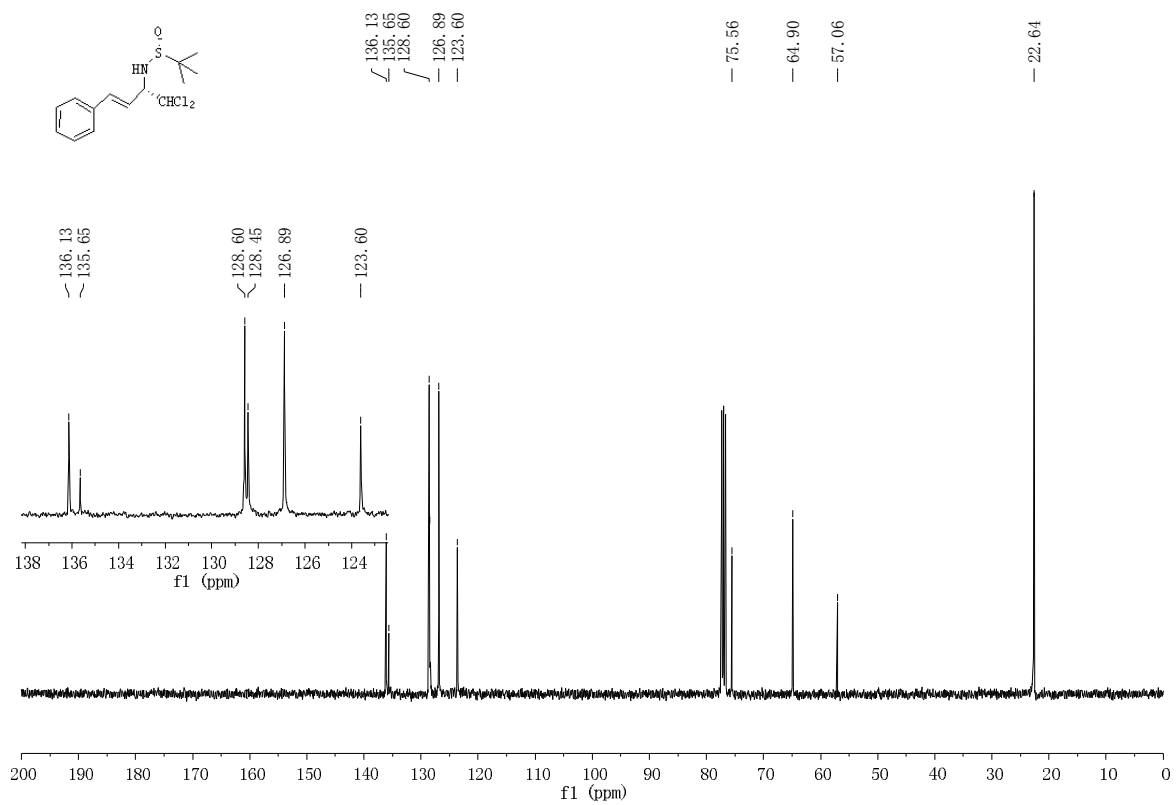

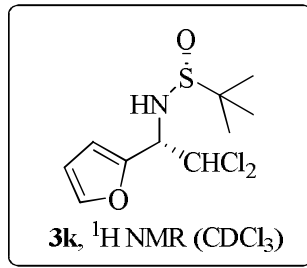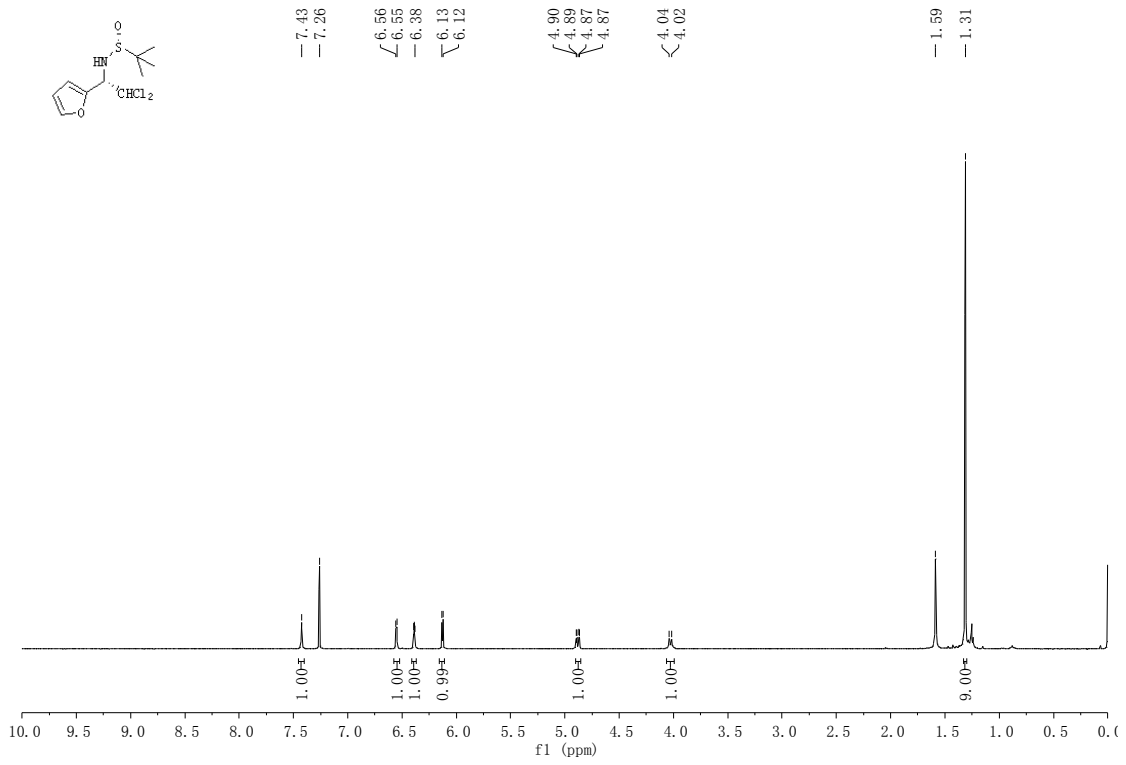

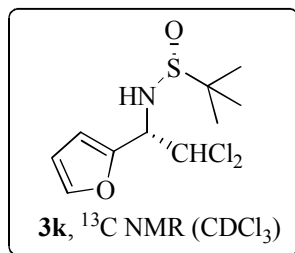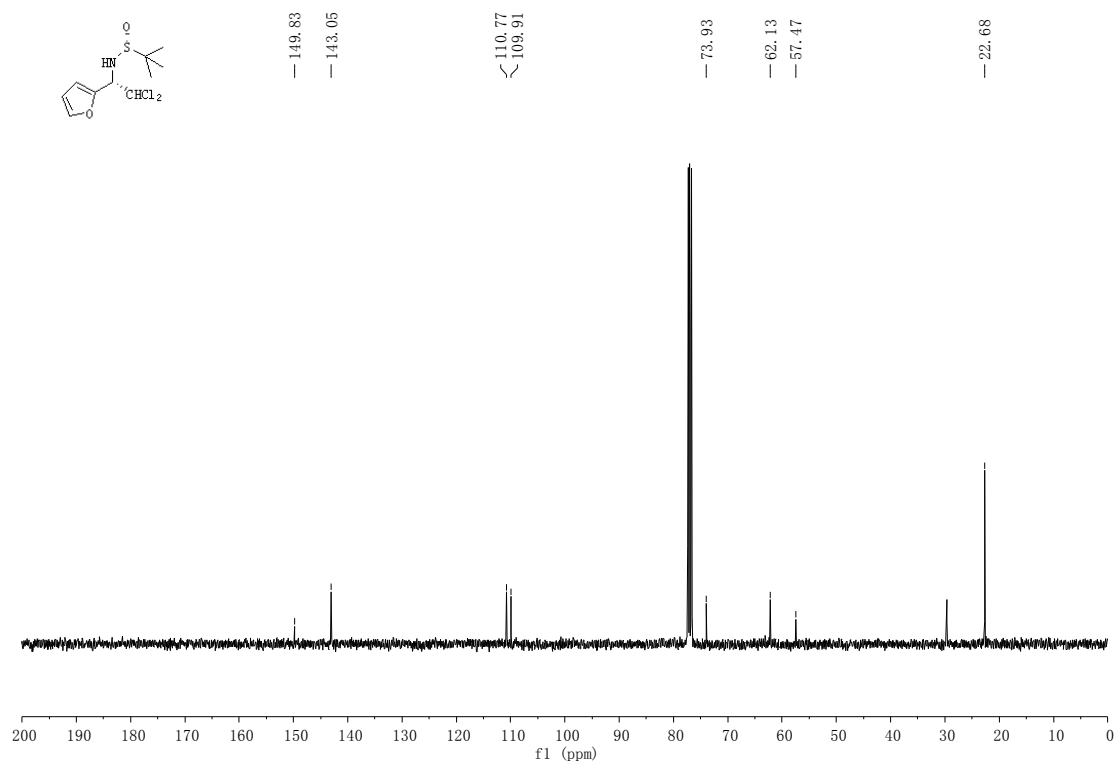

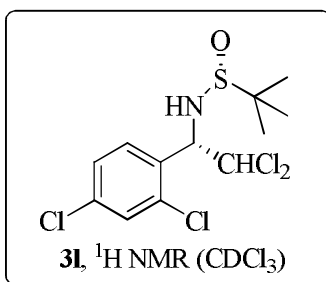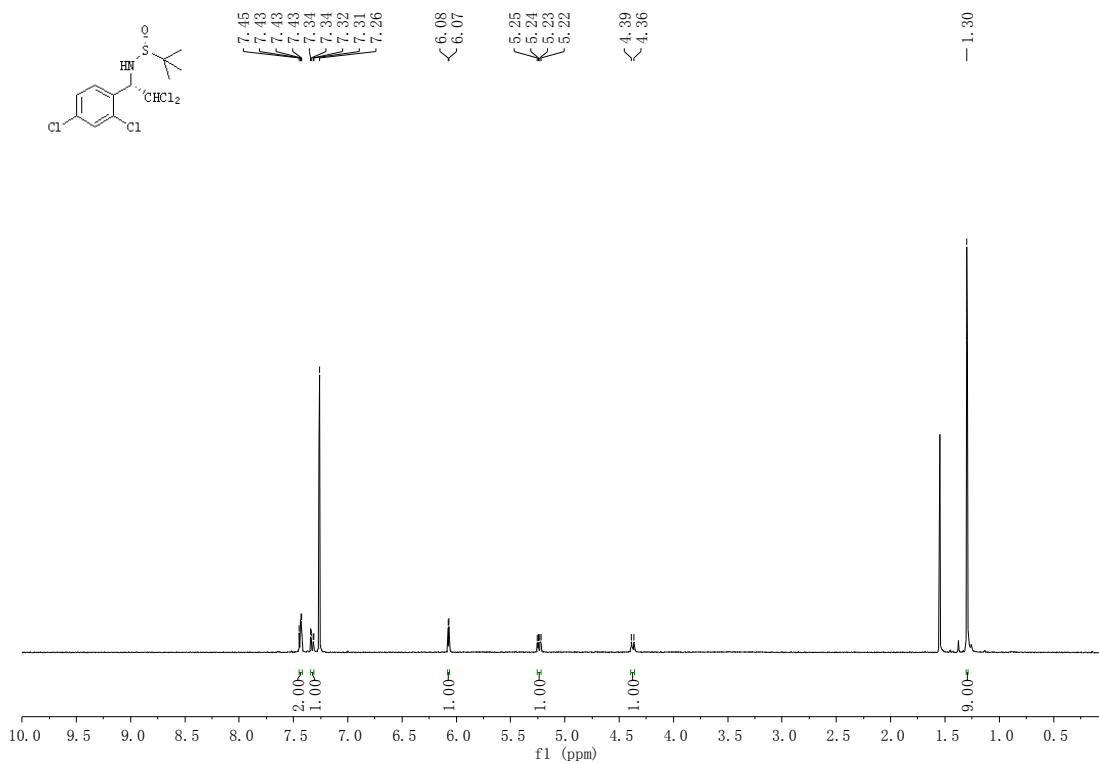

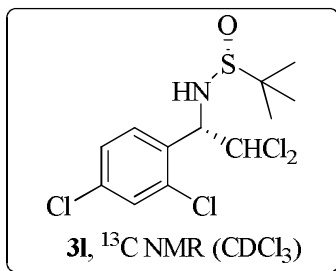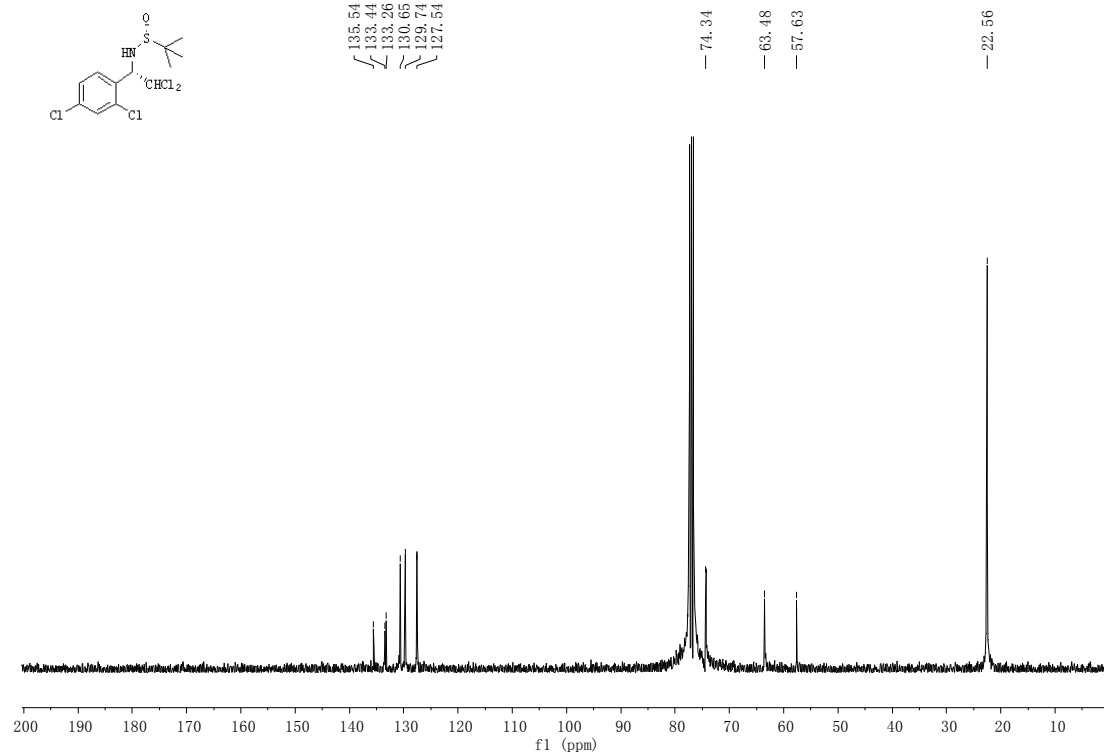

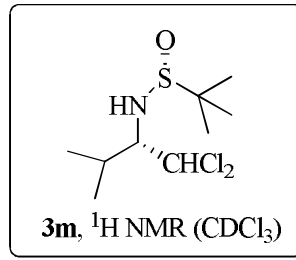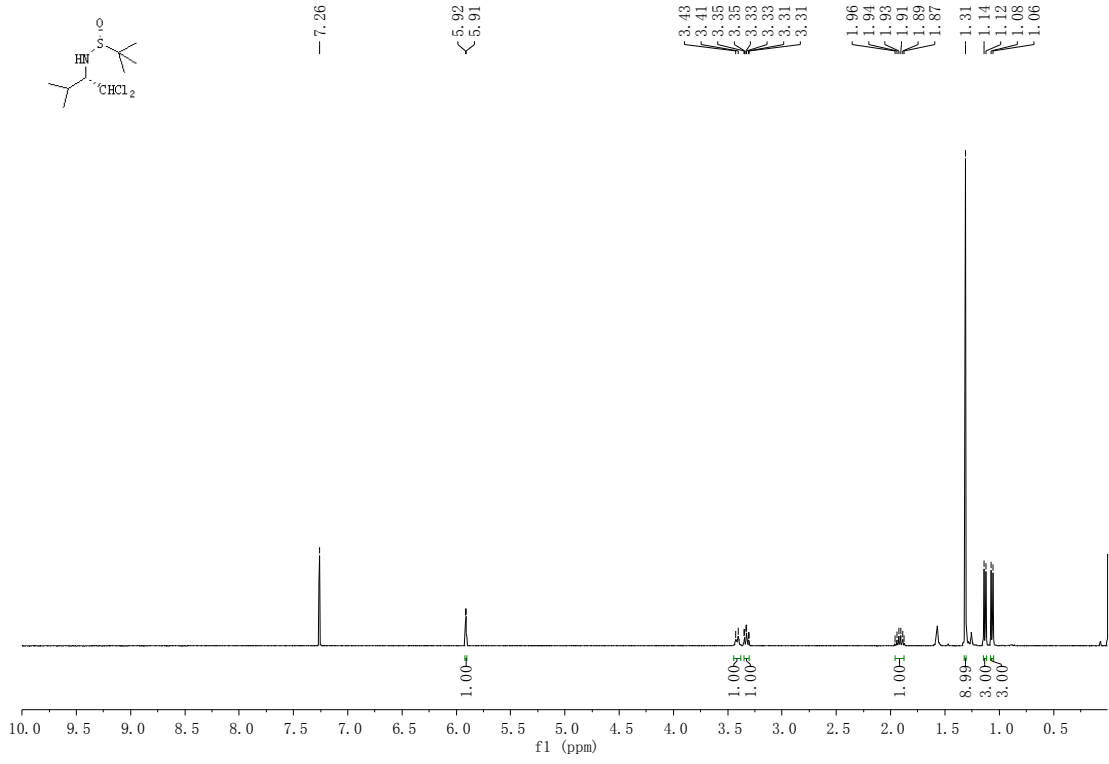

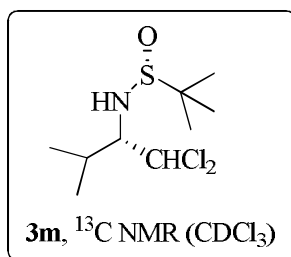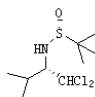

- 75.77  
 - 69.69  
 - 57.44  
 - 31.77  
 - 23.06  
 - 19.86  
 - 19.44

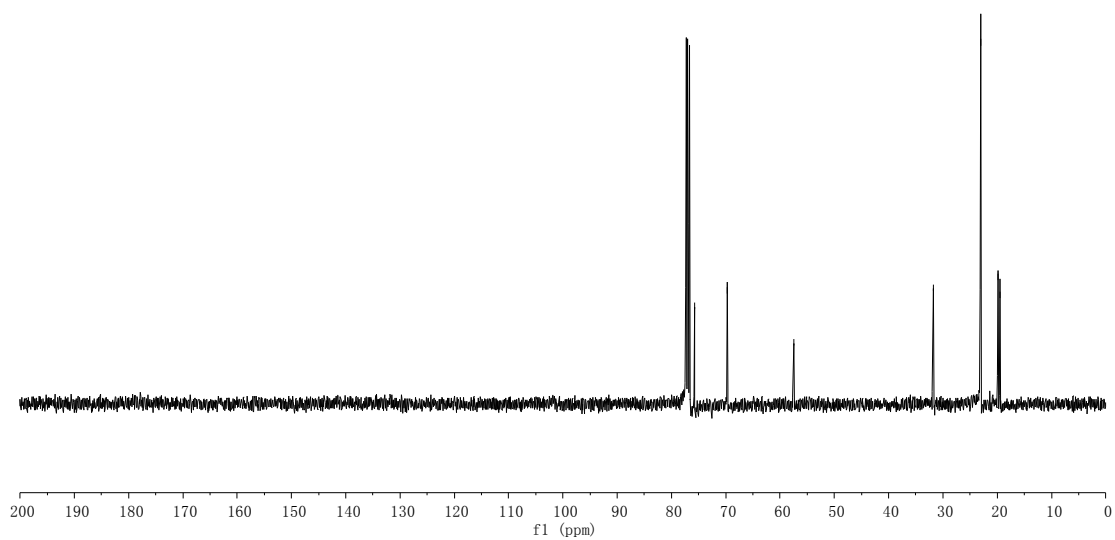



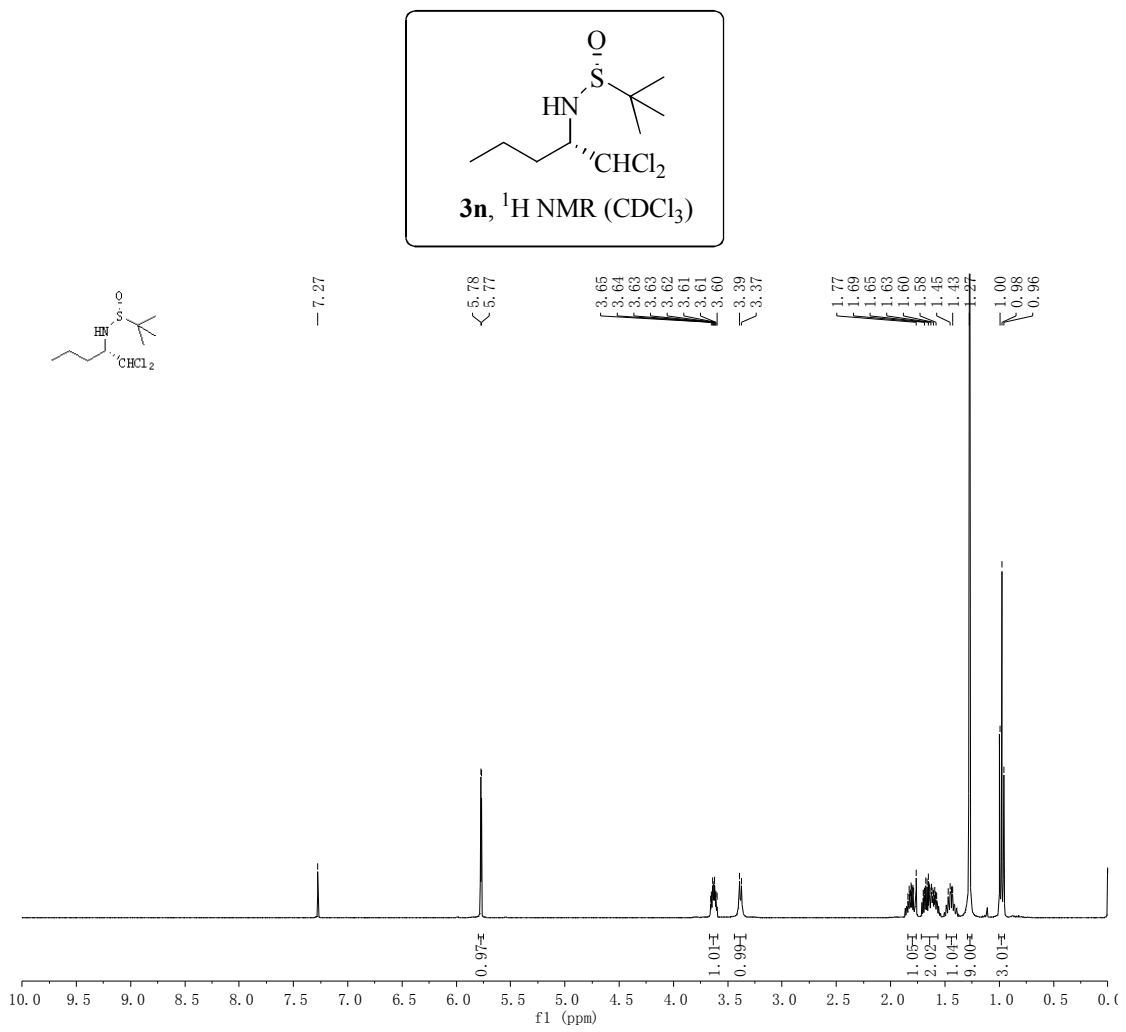

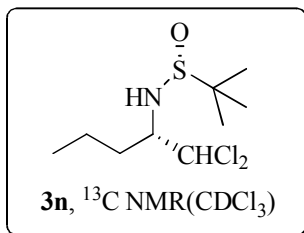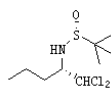

— 76.54  
 — 63.78  
 — 56.89  
 — 34.37  
 — 22.76  
 — 18.94  
 — 13.69

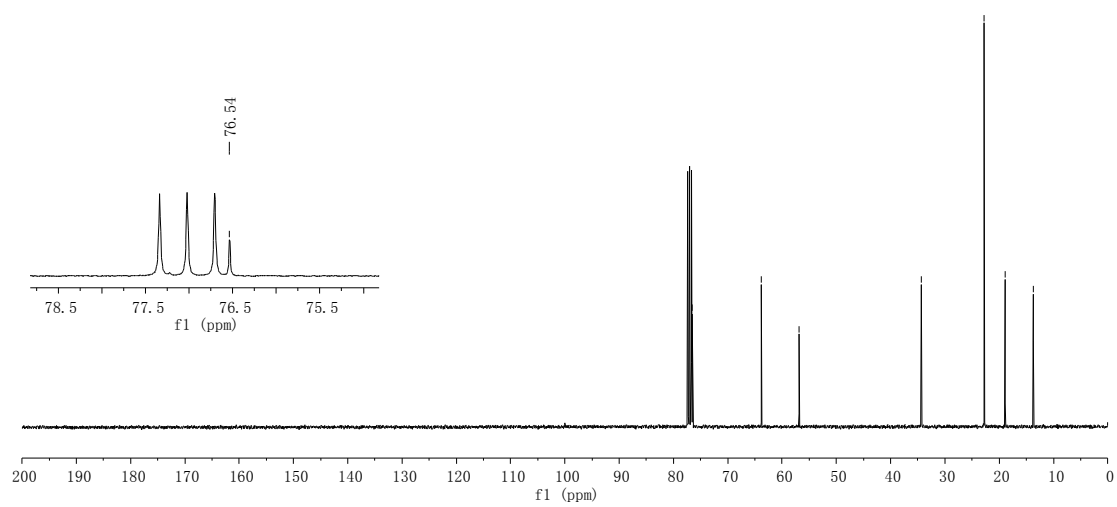

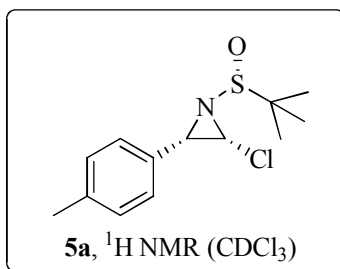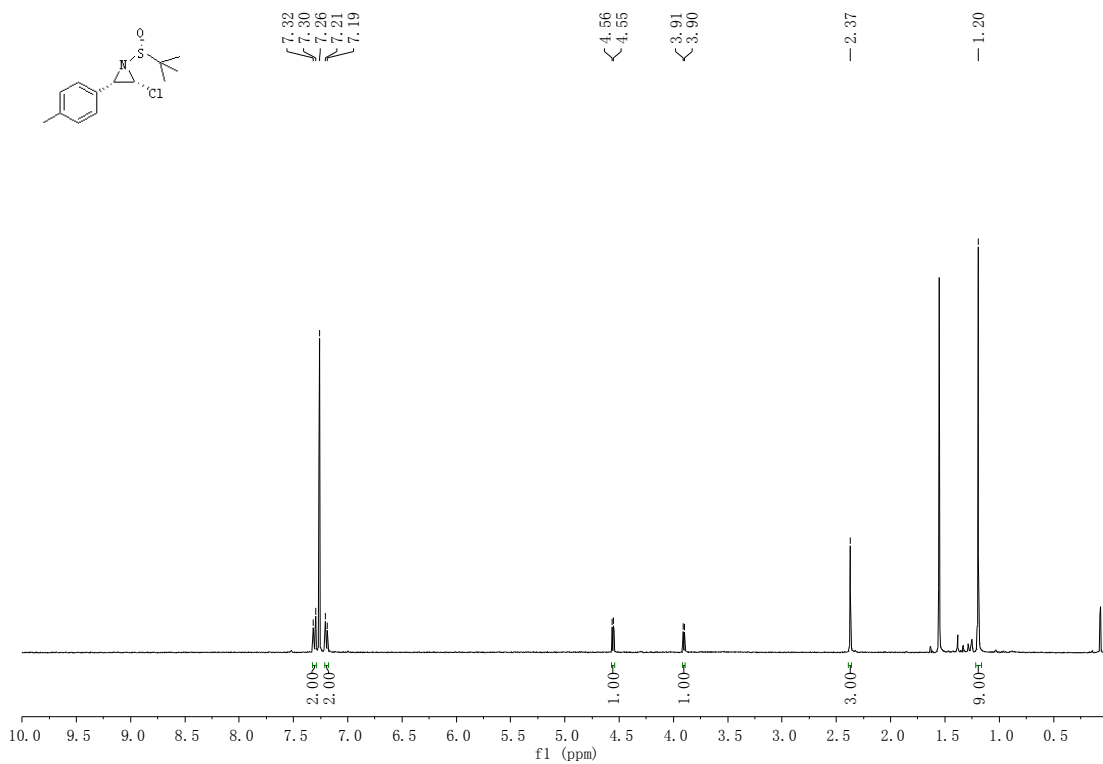

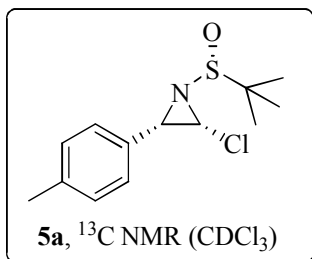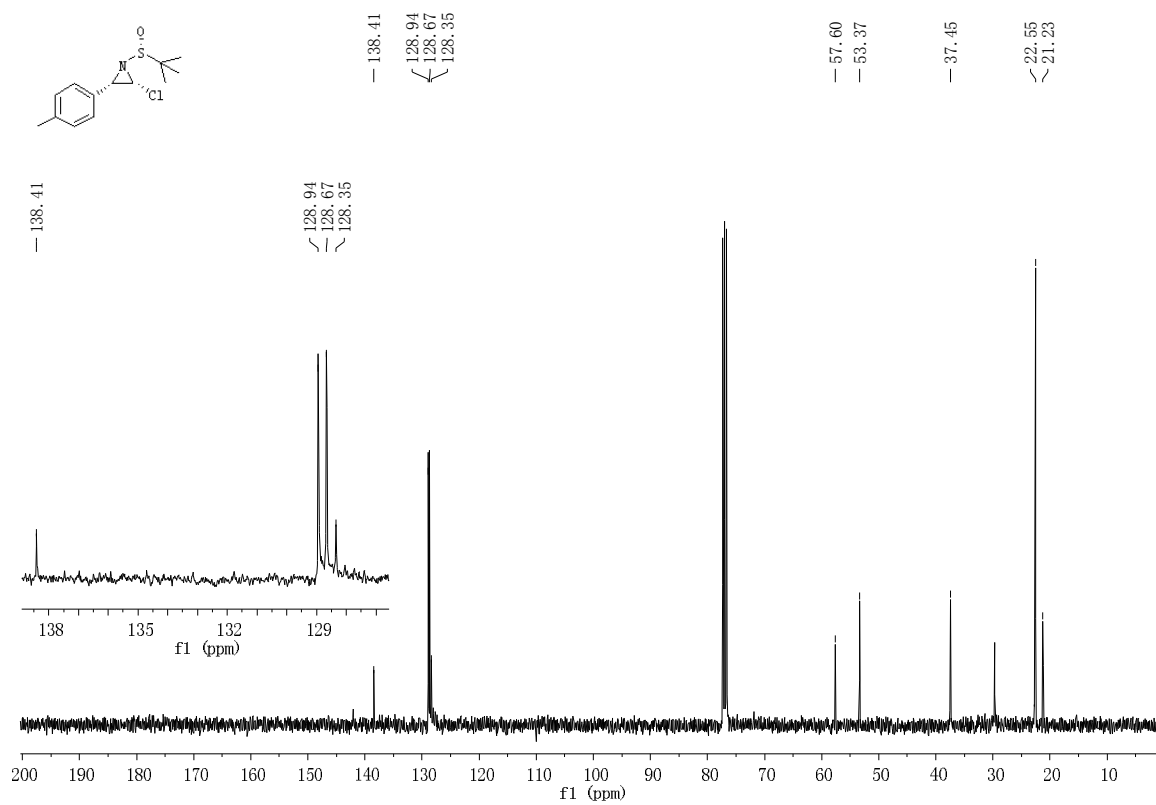

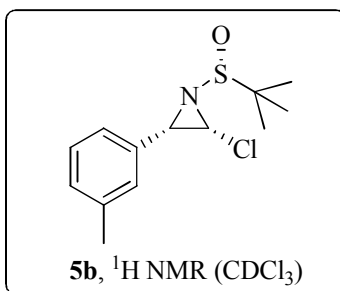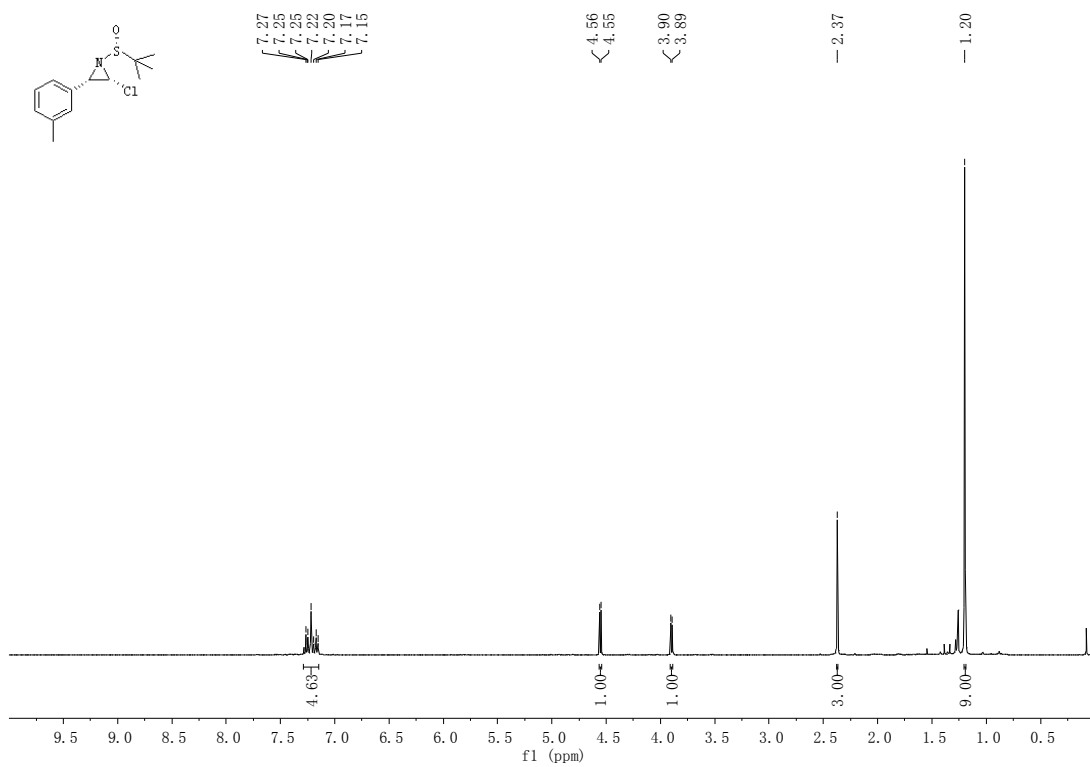

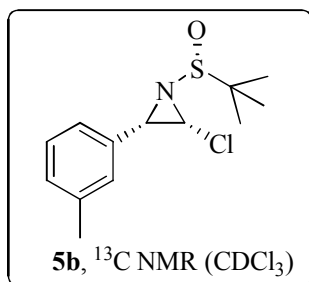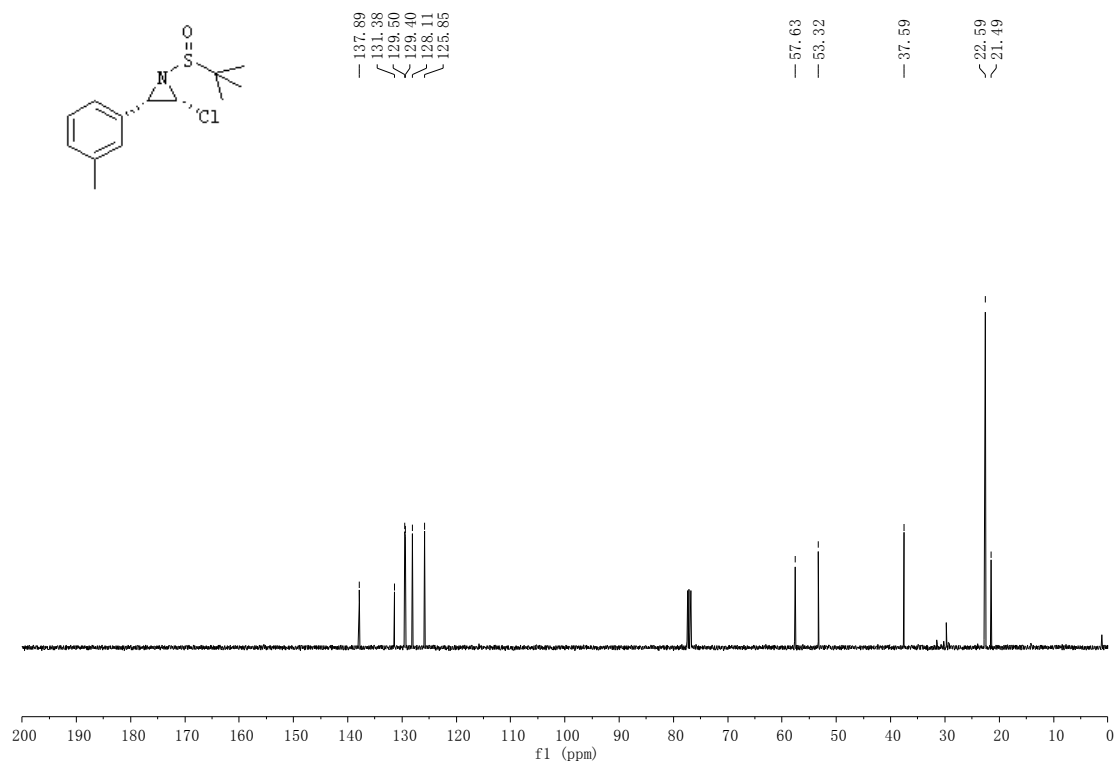

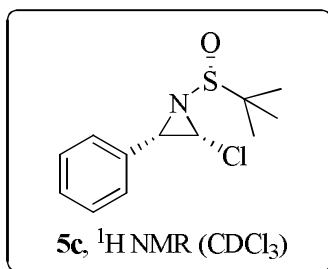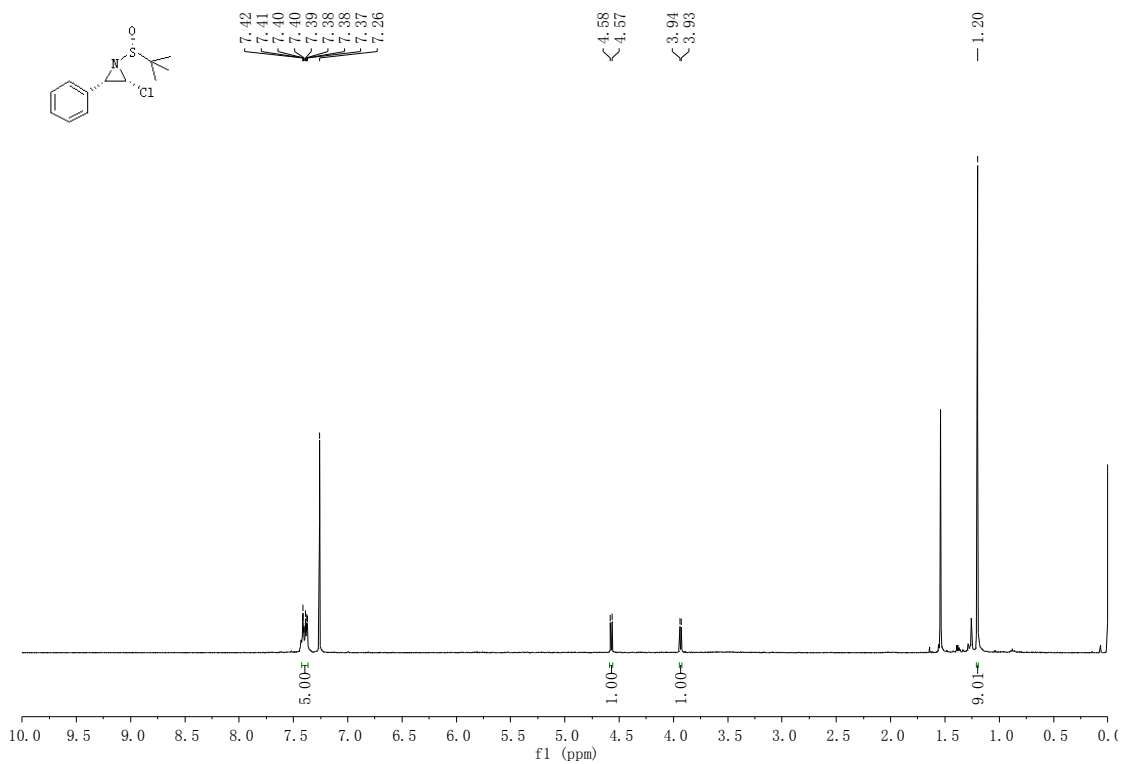

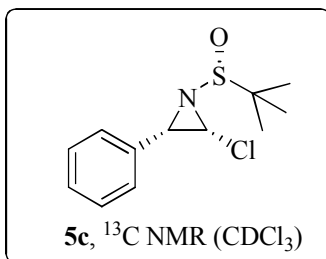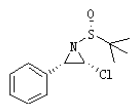

131.42  
128.77  
128.53  
128.18

57.64  
53.30

37.51

22.53

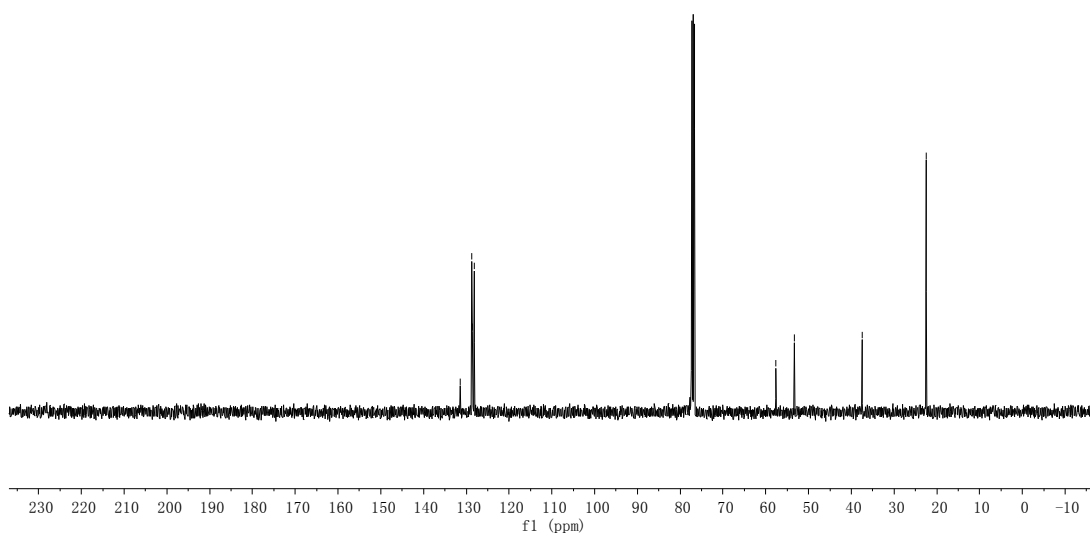



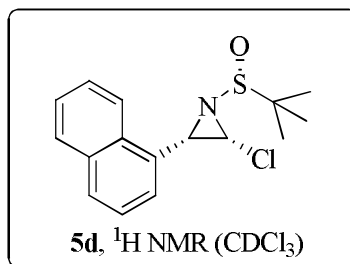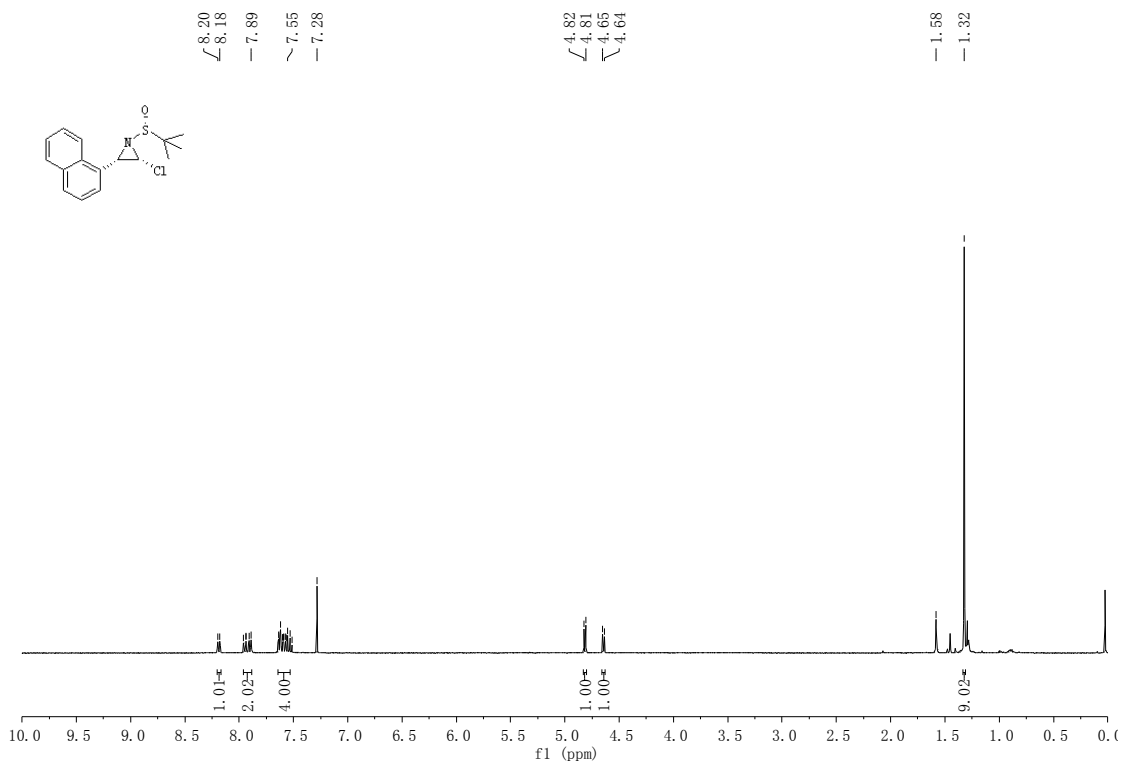

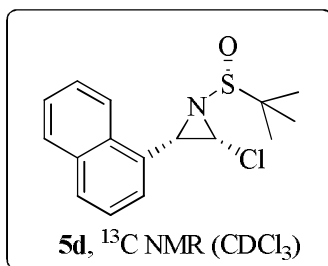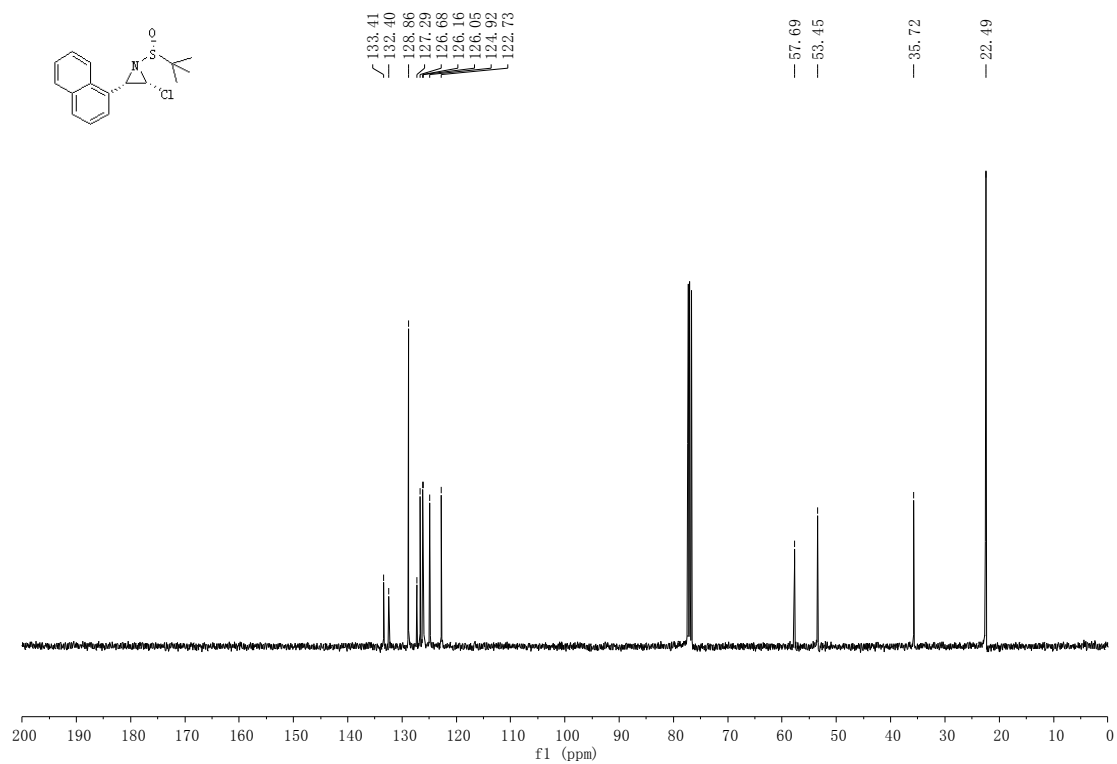

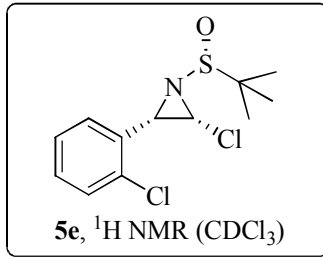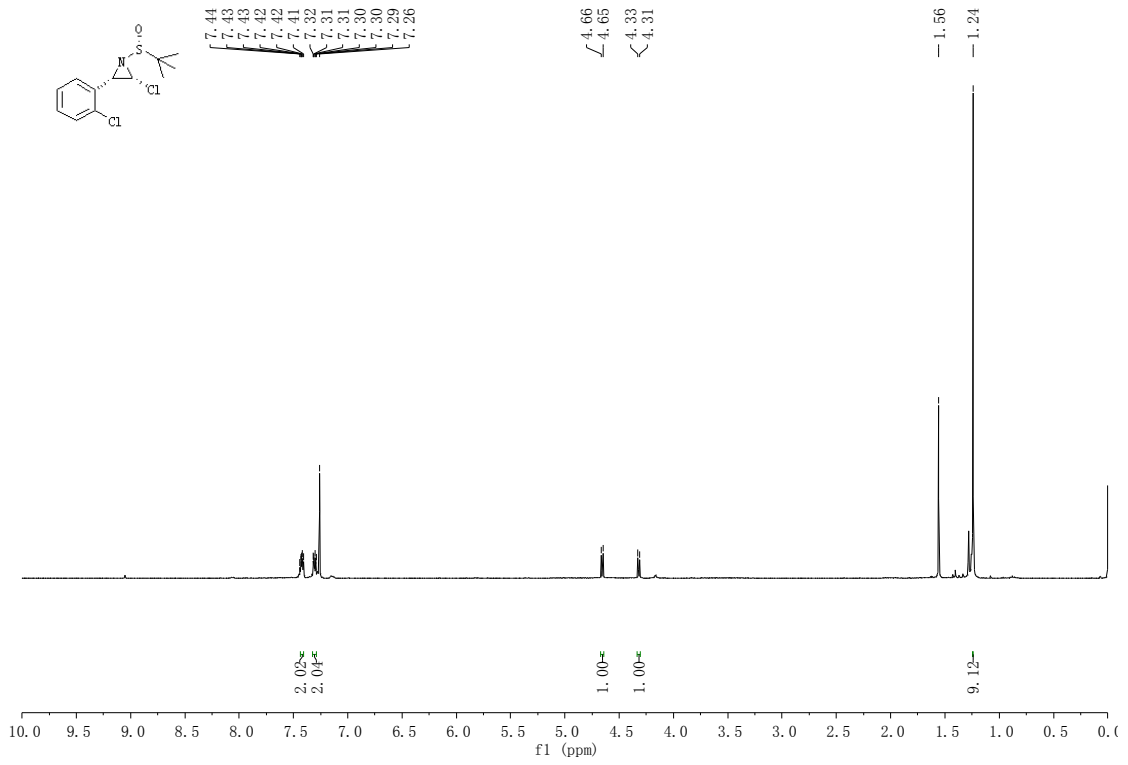

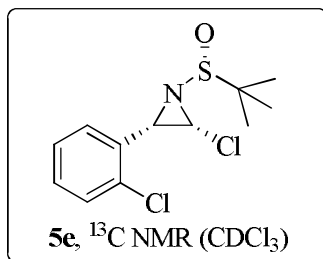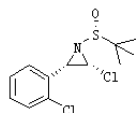

— 135.21  
 — 129.48  
 — 126.37

— 57.70  
 — 52.94

— 35.91

— 22.50

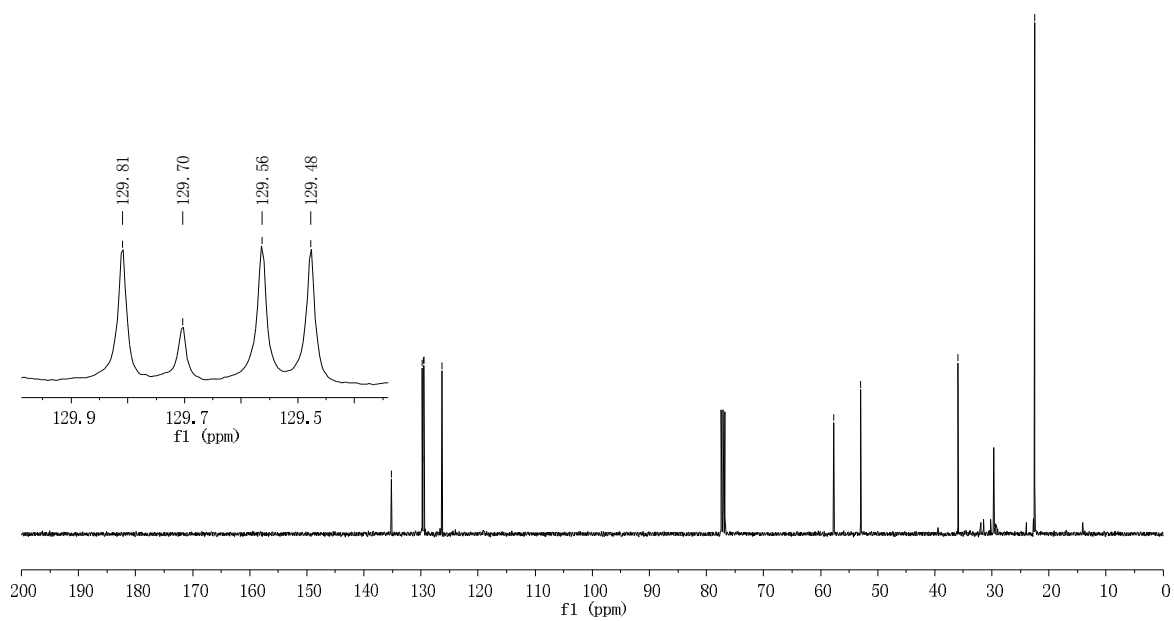

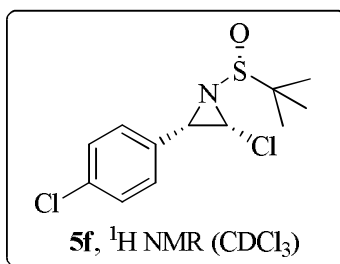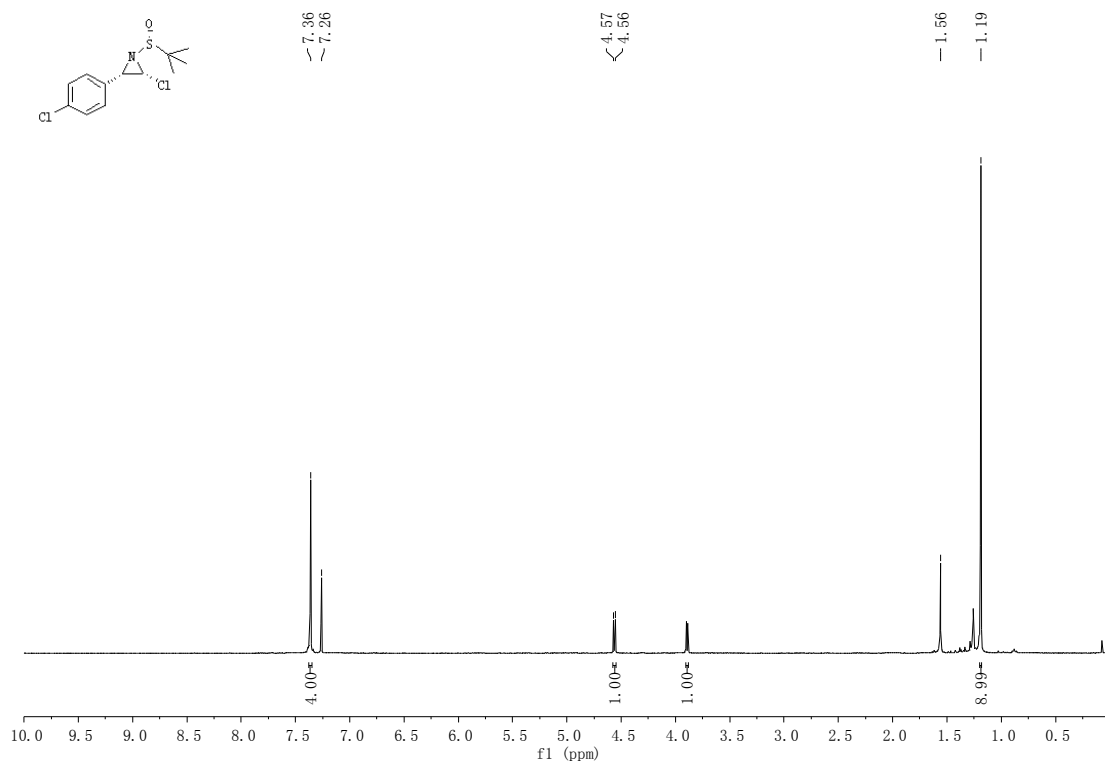

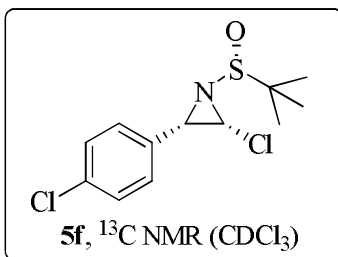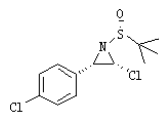

129.75  
129.52  
129.44  
126.31

57.68  
52.90

35.88

22.48

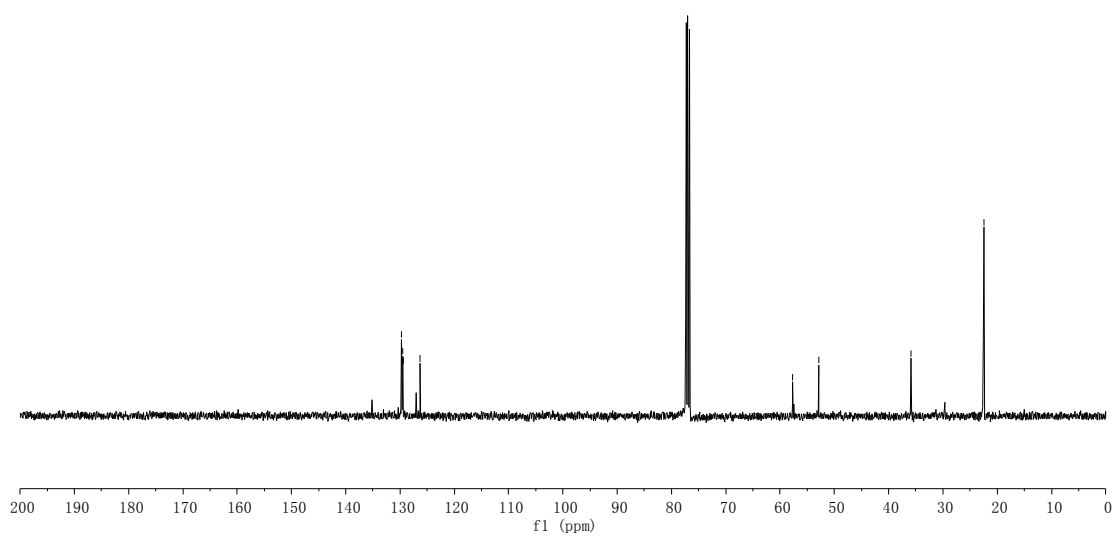

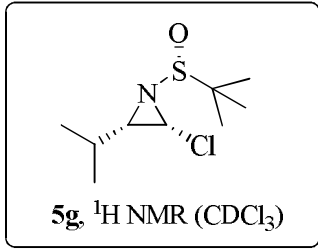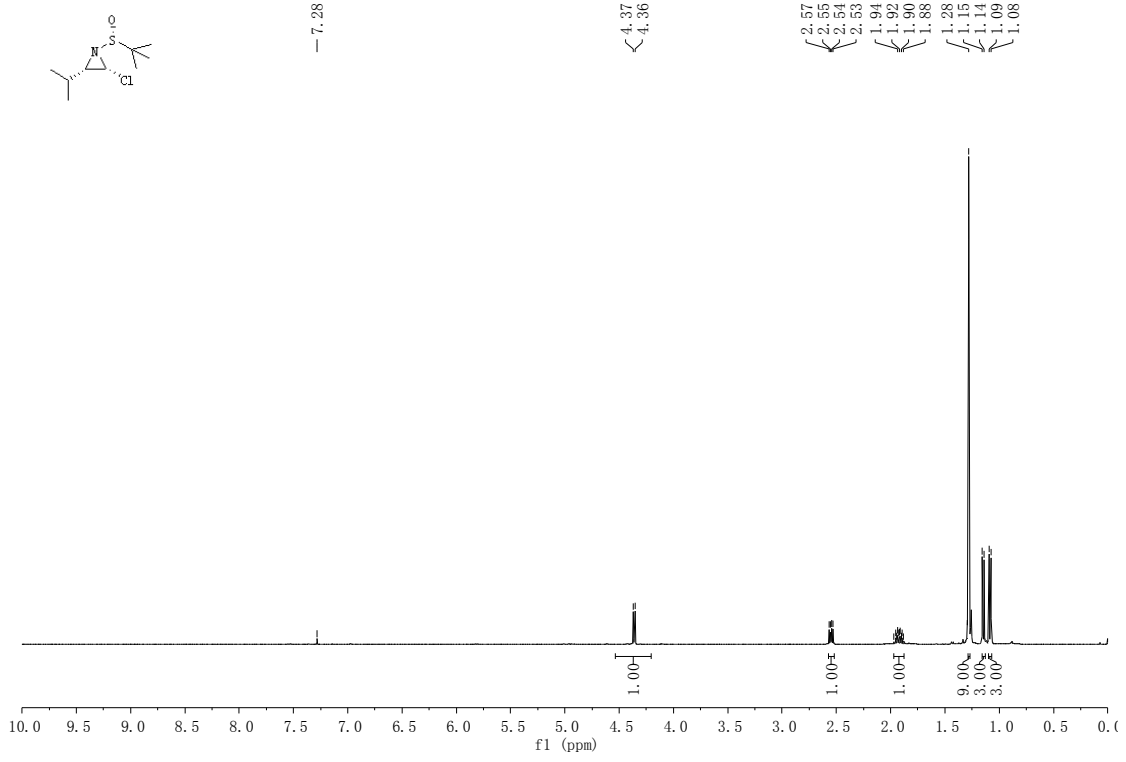

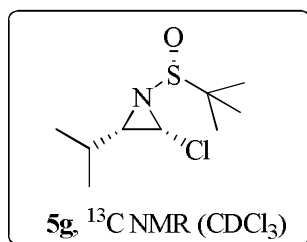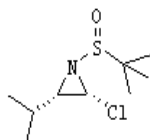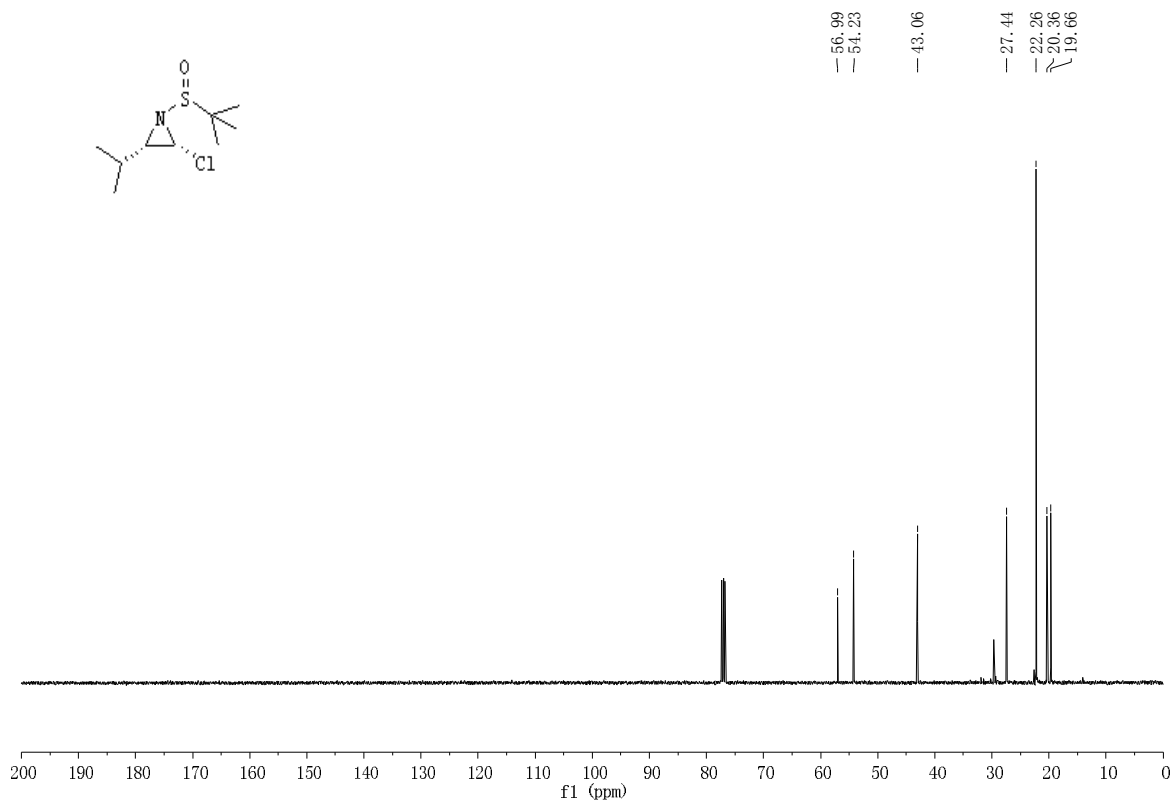



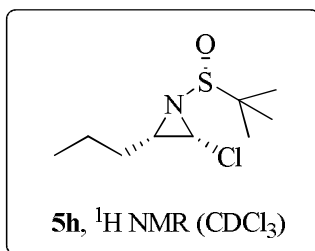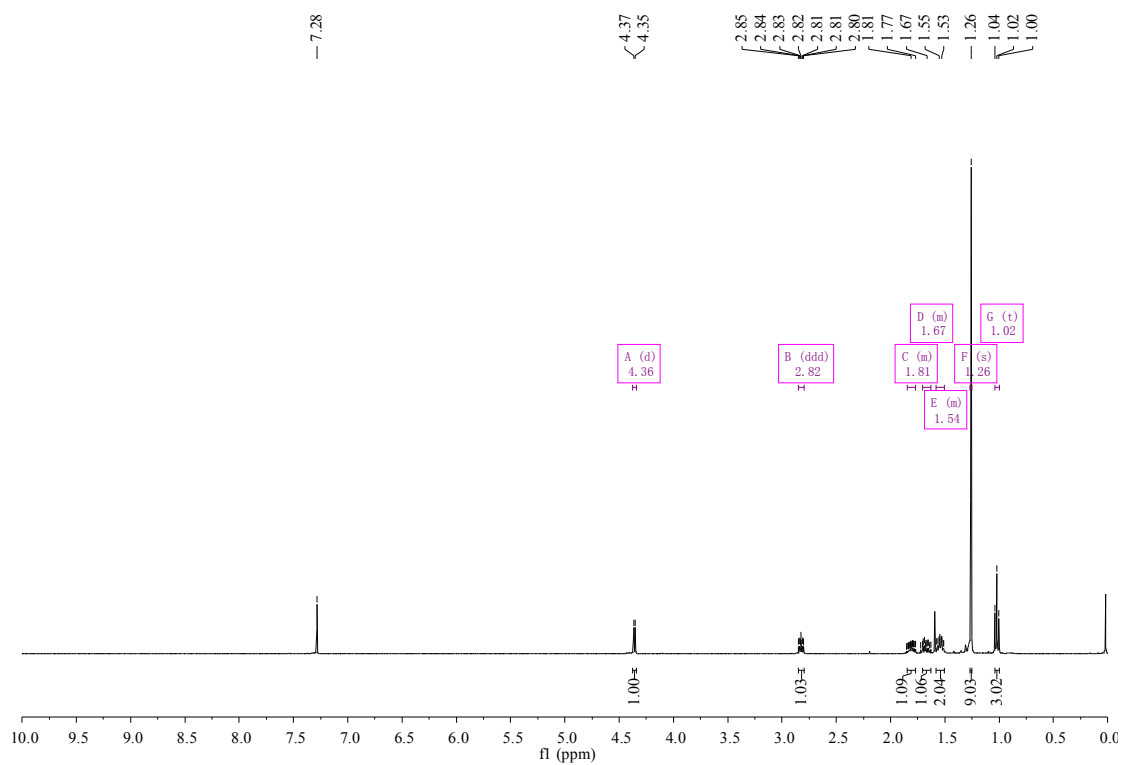

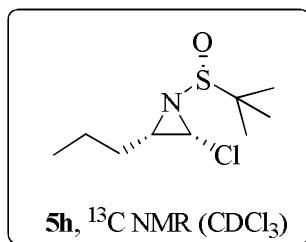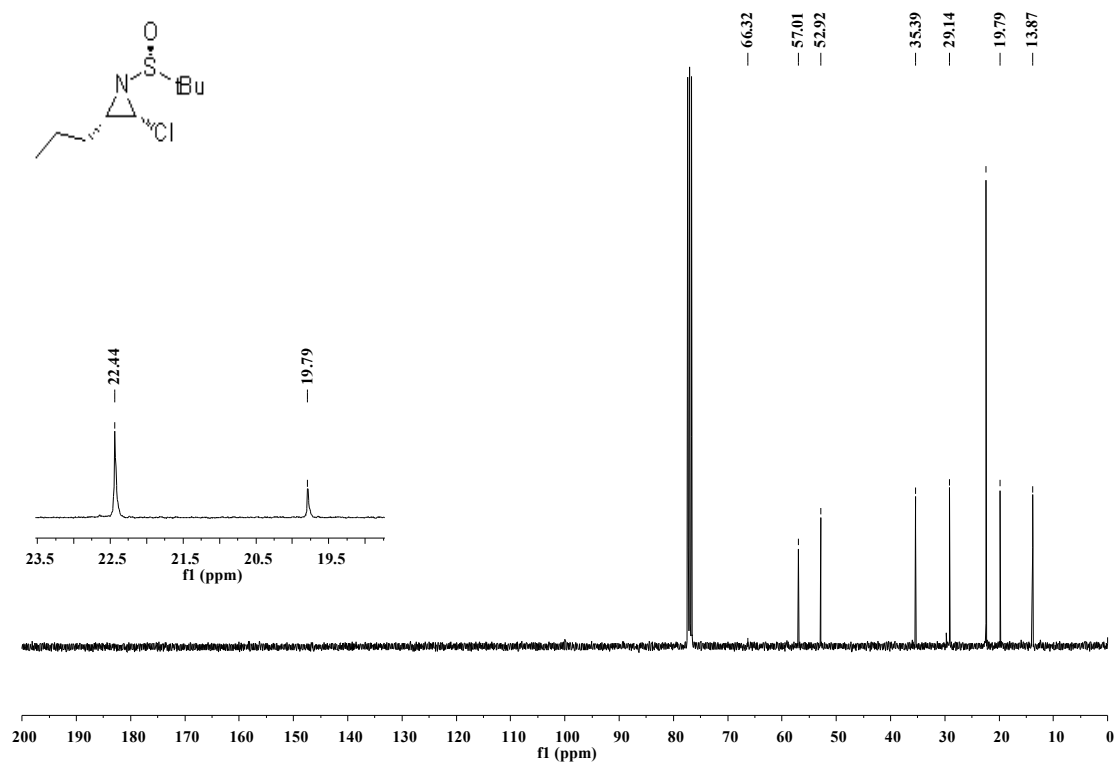

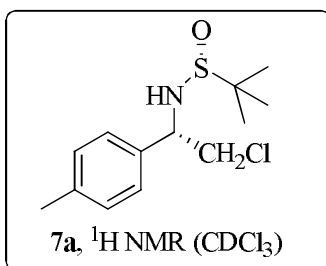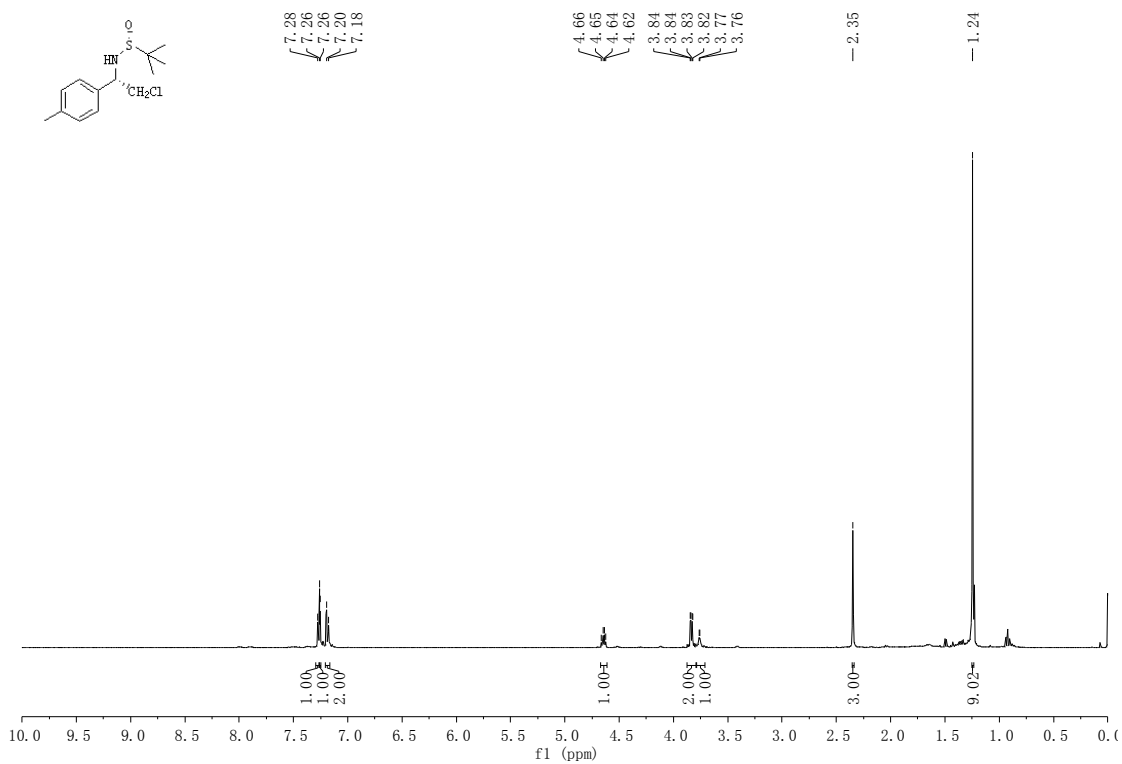

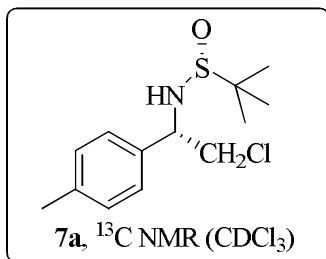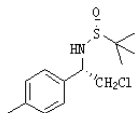

< 138.41  
 < 135.96  
 < 129.51  
 < 127.16

< 59.37  
 < 56.41  
 < 48.41

< 22.56  
 < 21.12

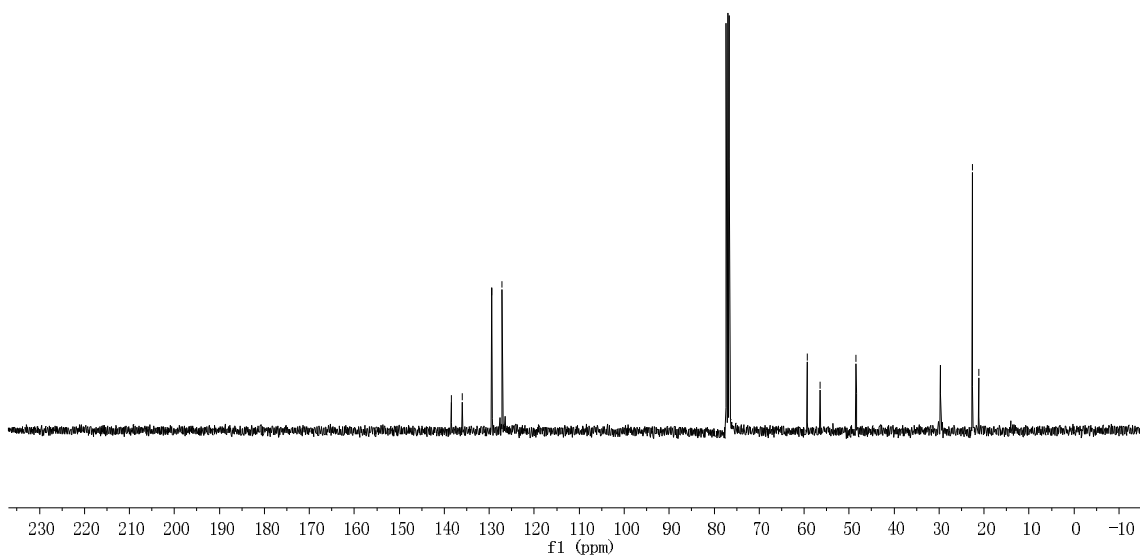

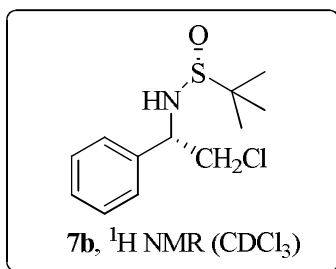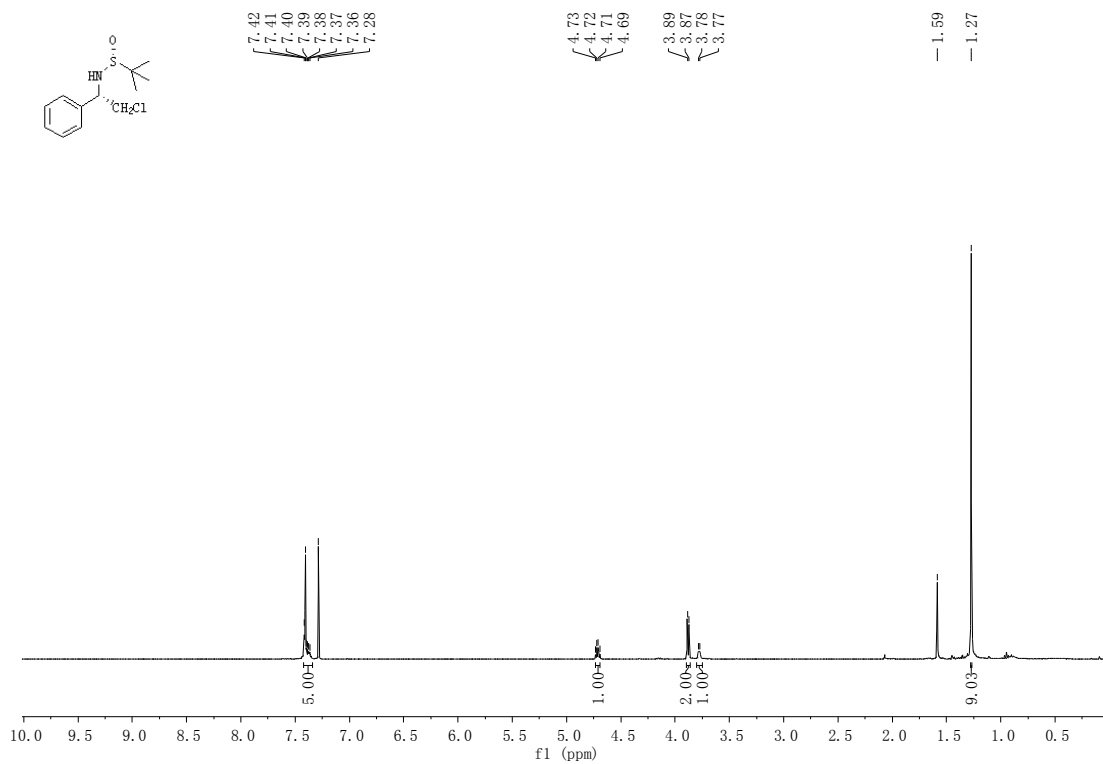

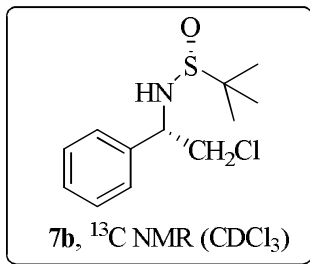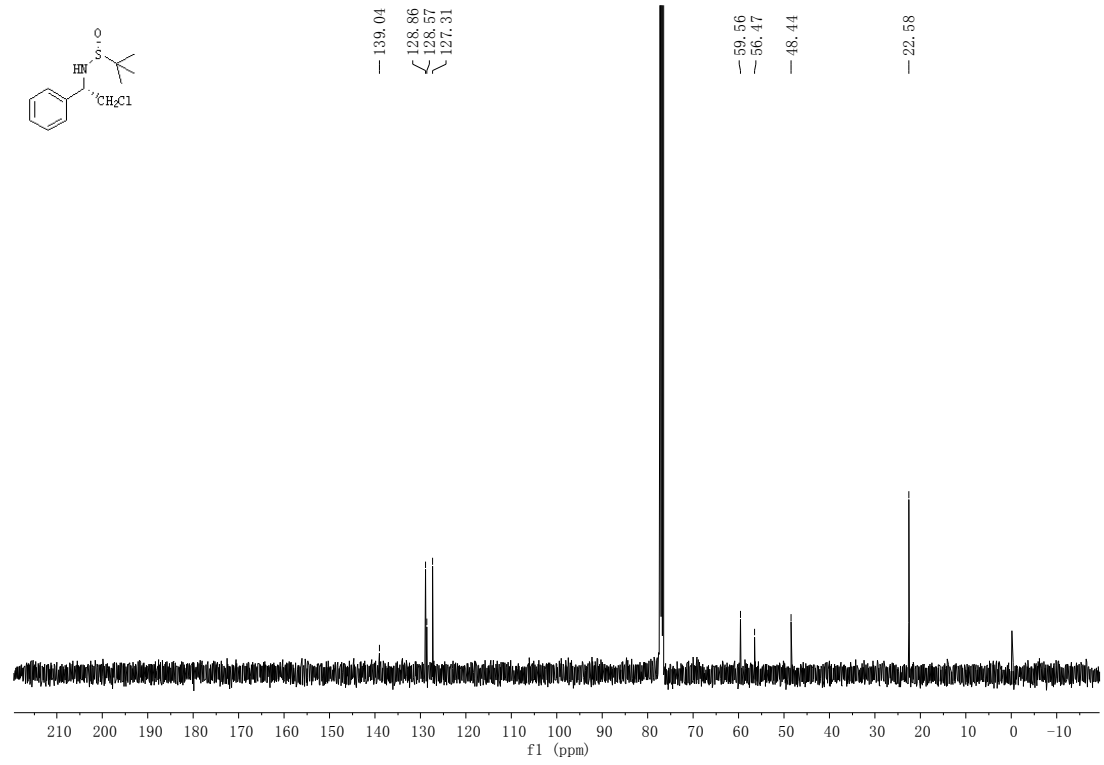

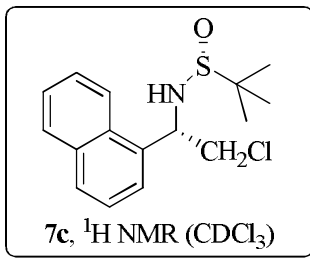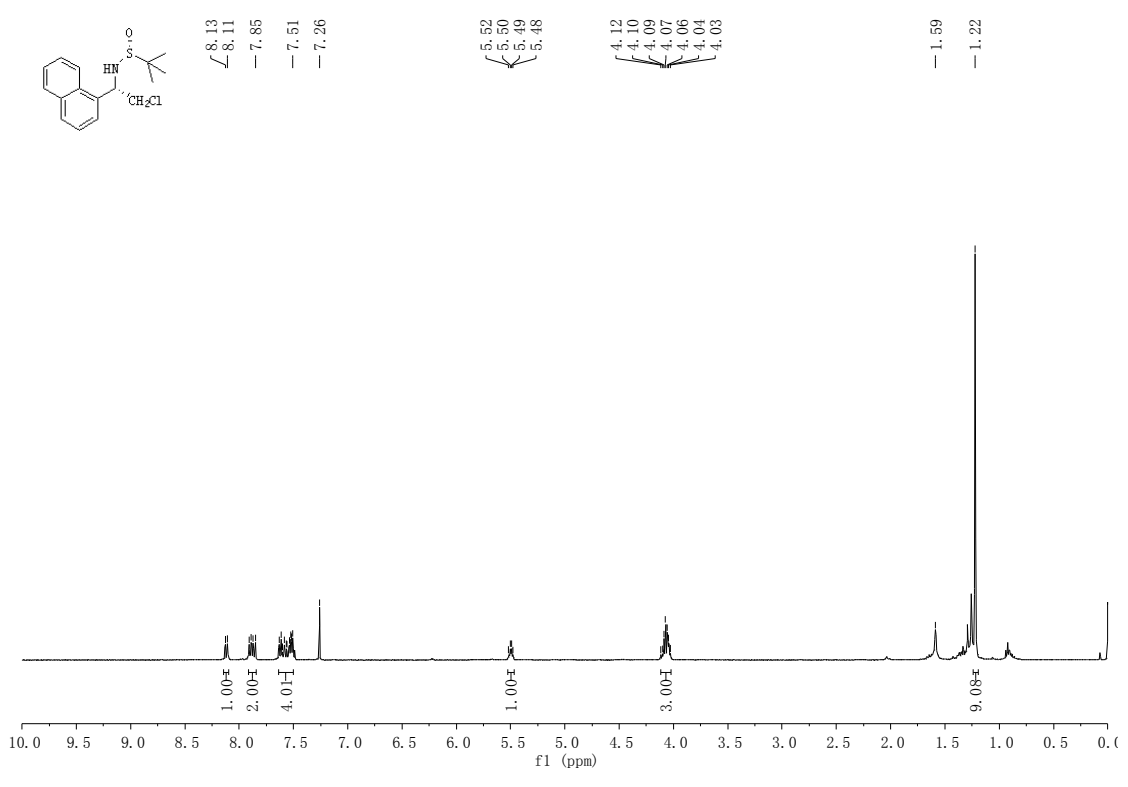

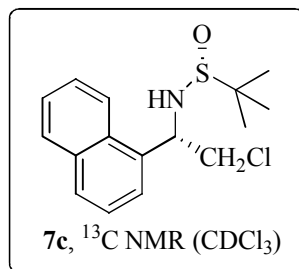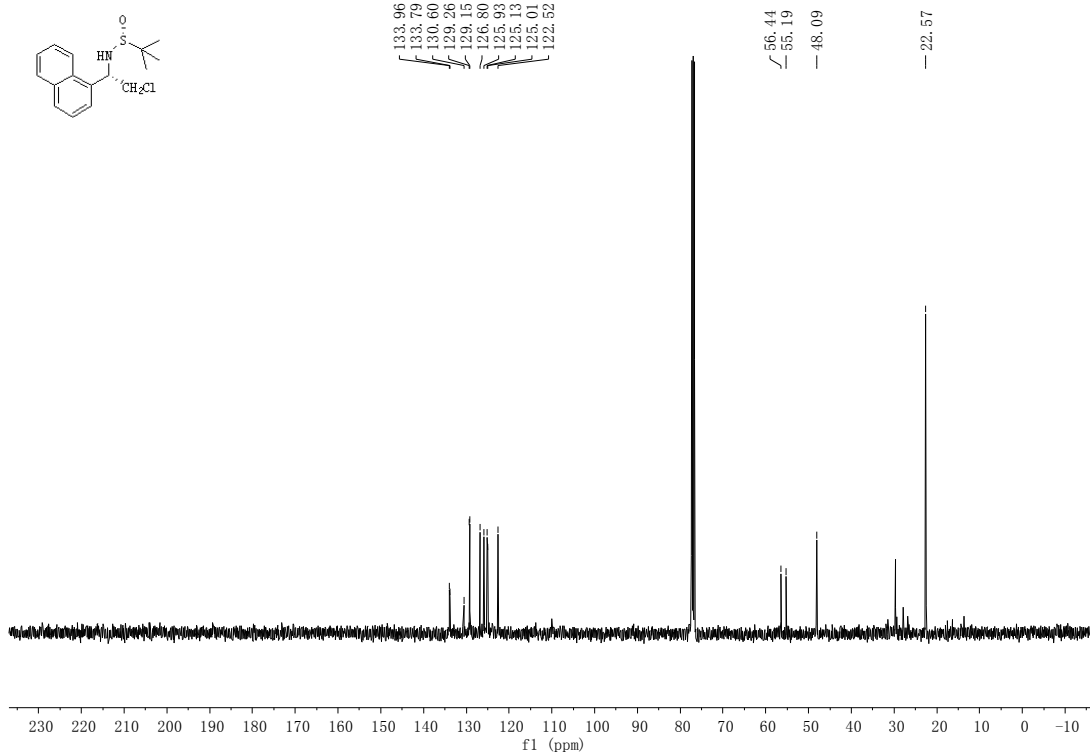



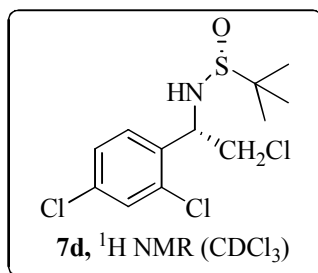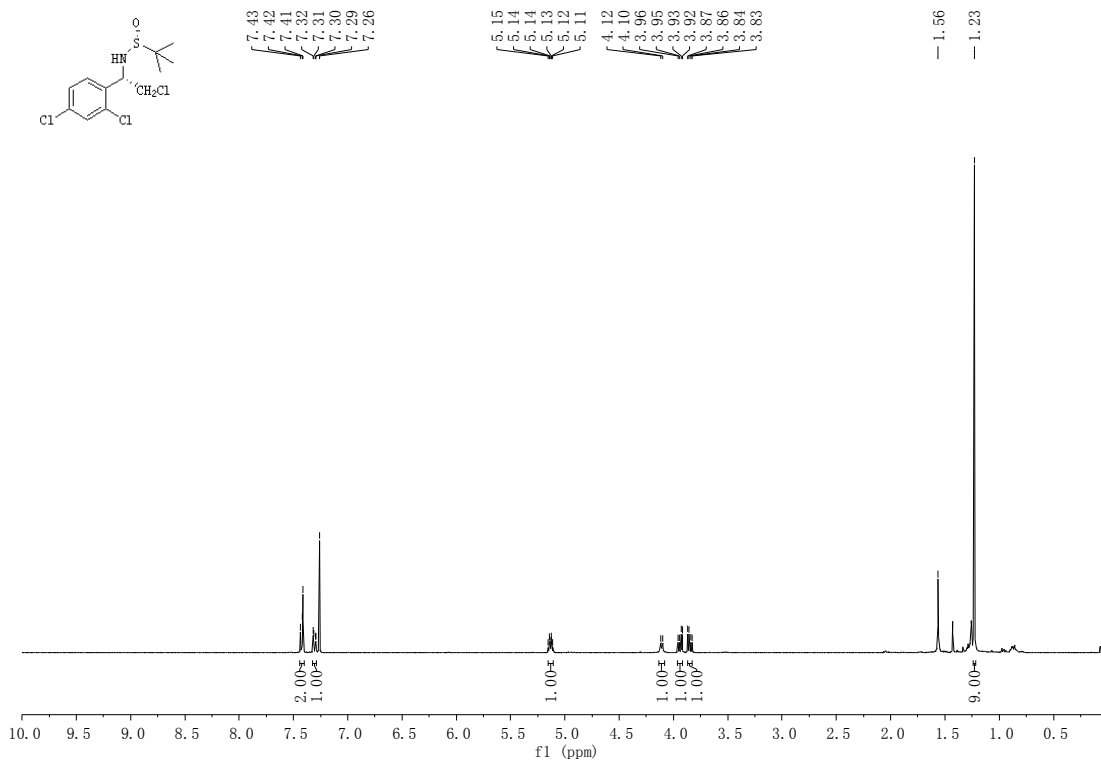

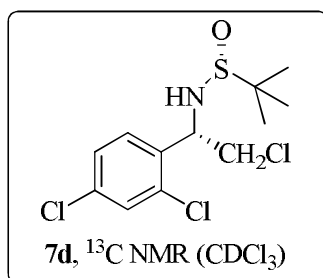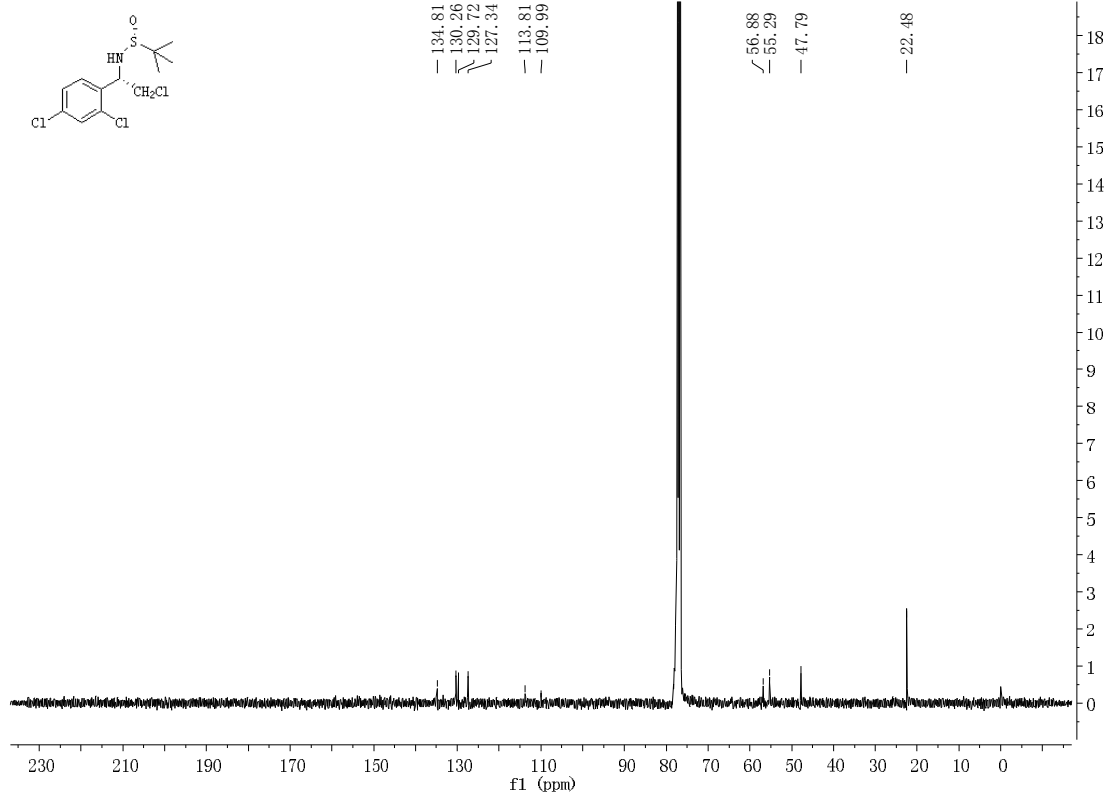

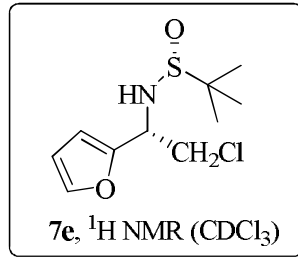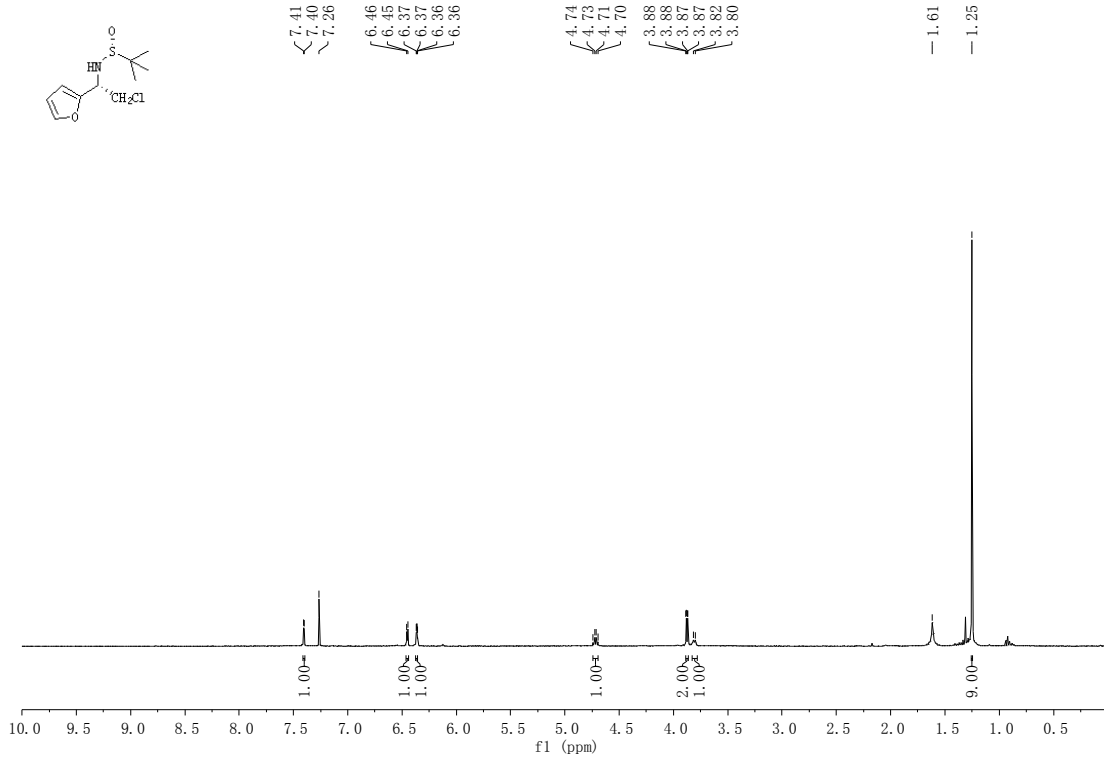

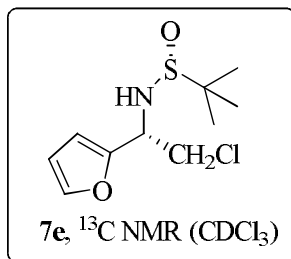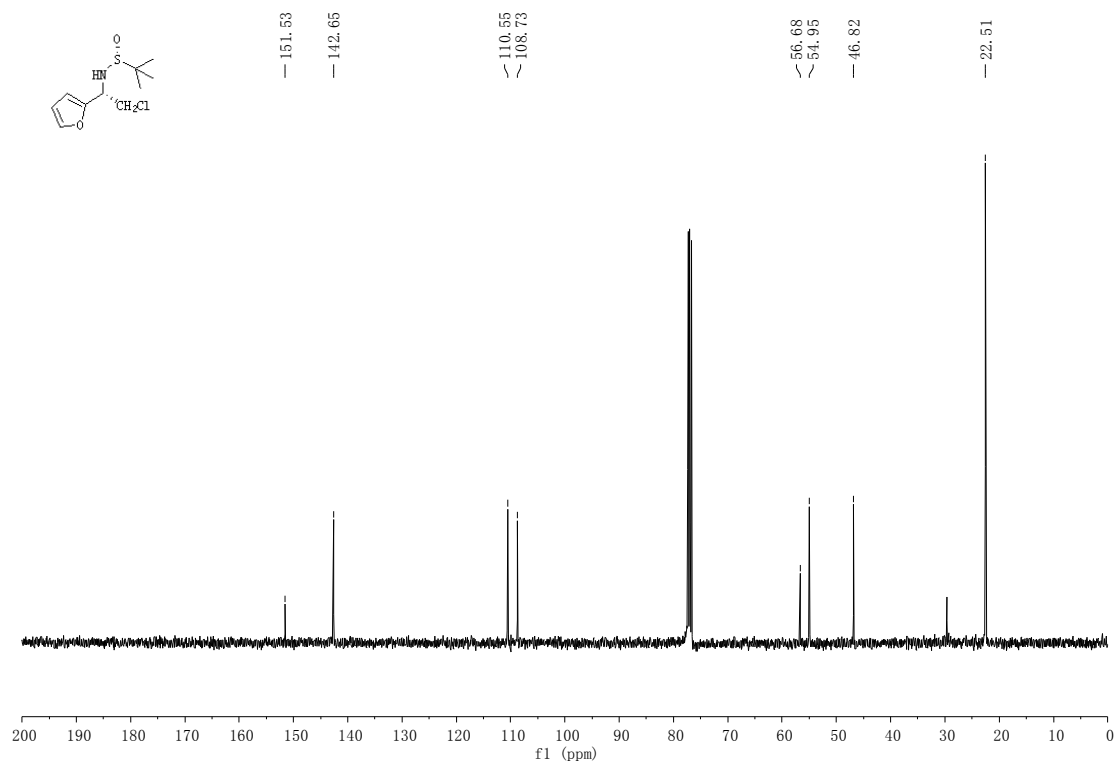

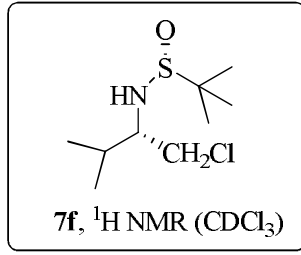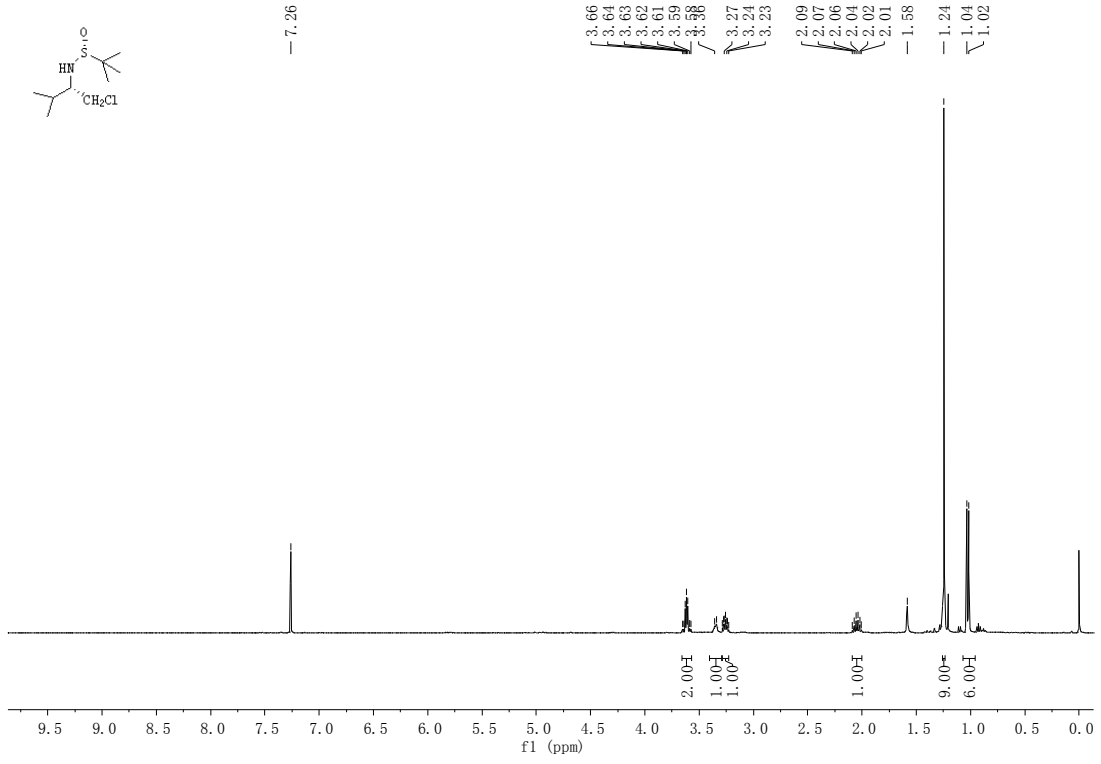

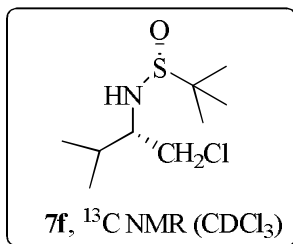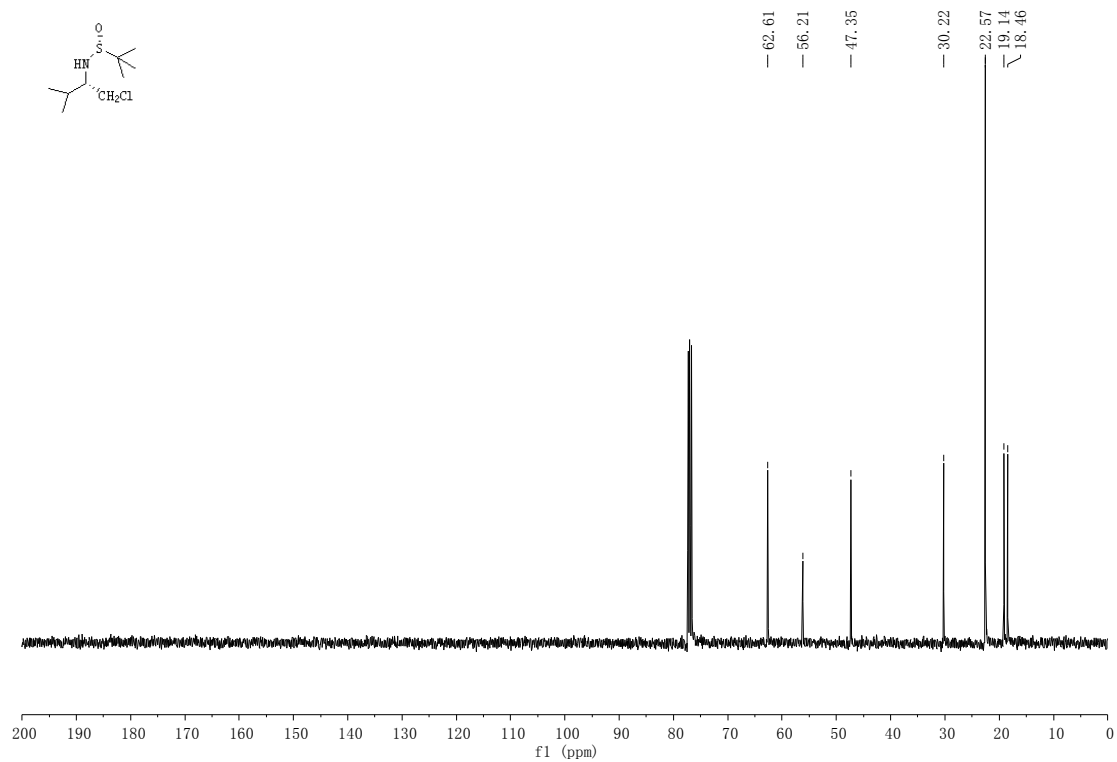

Supplement: c4ra00471j1.pdf [file c4ra00471j1.pdf]
